# Supplementary material for: The imaginary eruption. Volcanic activity through kids’ eyes
Source: Copernicus journal article supplement (doi:10.5194/gc-2022-2), 2022-02-01
Supplement: Supplementary file 1 [file gc-2022-2-supplement-version4.pdf]

## **Supplement 1 - Whole stories**

Selected examples of the stories collected during the workshop Eruzione Immaginaria organized by the Edurisk project. Each story is composed by 4 frames: the story's settings; volcanic unrest; the eruption; and the epilogue.

Drawings were realized by the pupils of primary and secondary schools listed in Table 1. The schools' enrolment into the project was discussed by schools' board and then presented to the families at the beginning of the school year, as a part of the school curriculum (Piano Triennale di Offerta Formativa). We did not collect any personal information about the participating students who always worked in pairs or small groups. Students were explicitly asked not to print their full names on their compositions. The production of text and drawings was not compulsory and students were free to decide the degree of their involvement in the exercise. The stories we collected were freely donated to be used for research purposes such as the present manuscript. Originals are kept into the Edurisk archives.

The supplement is provided as a portfolio, with examples of the collected materials.

**Supplement 1a.** Example story (frames 1-4) from Anonymous Student 1.

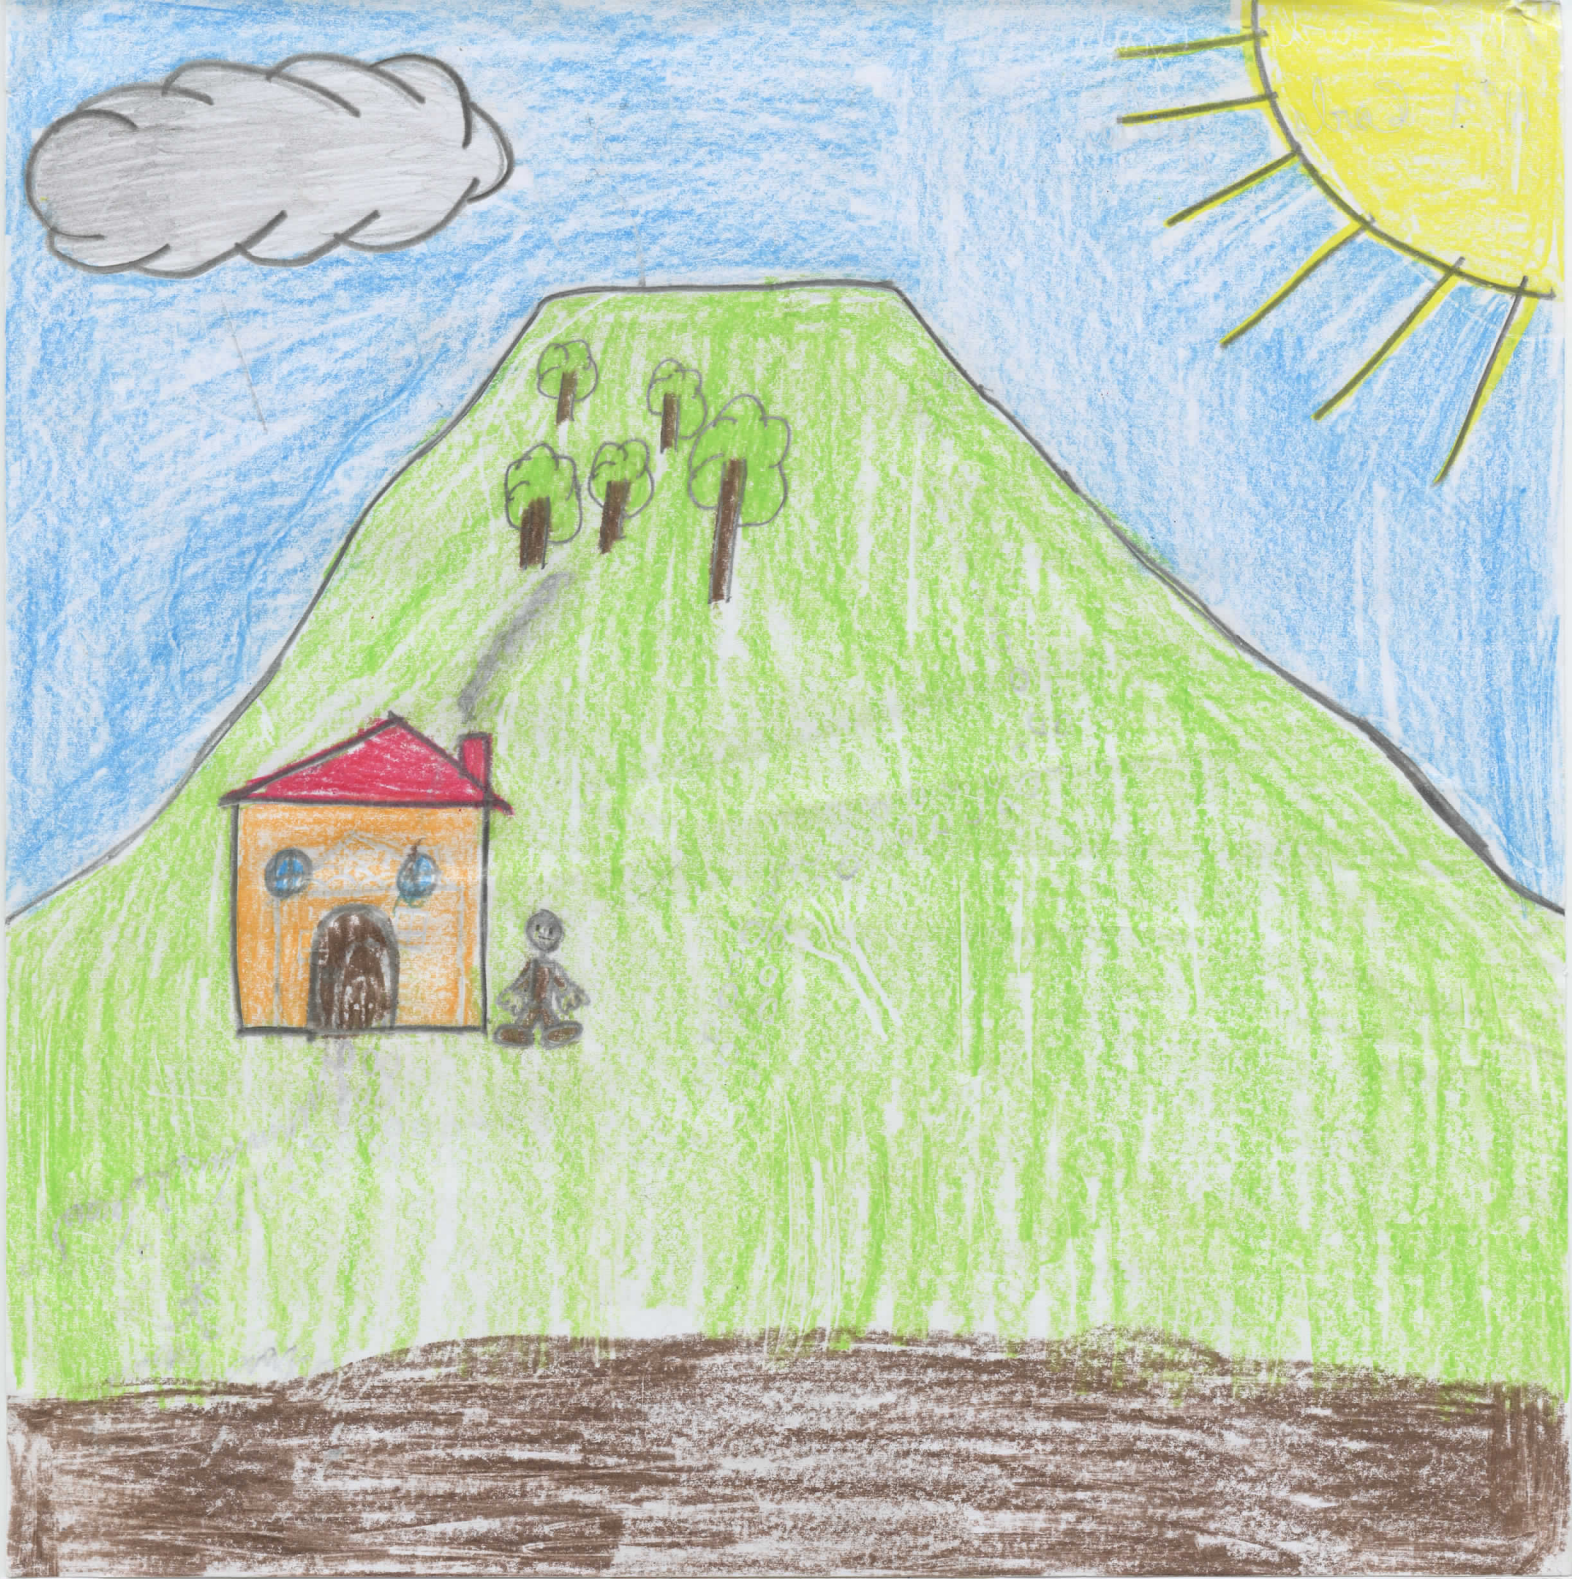

C'era una volta un mugnaio che visse vicino ad un vulcano.

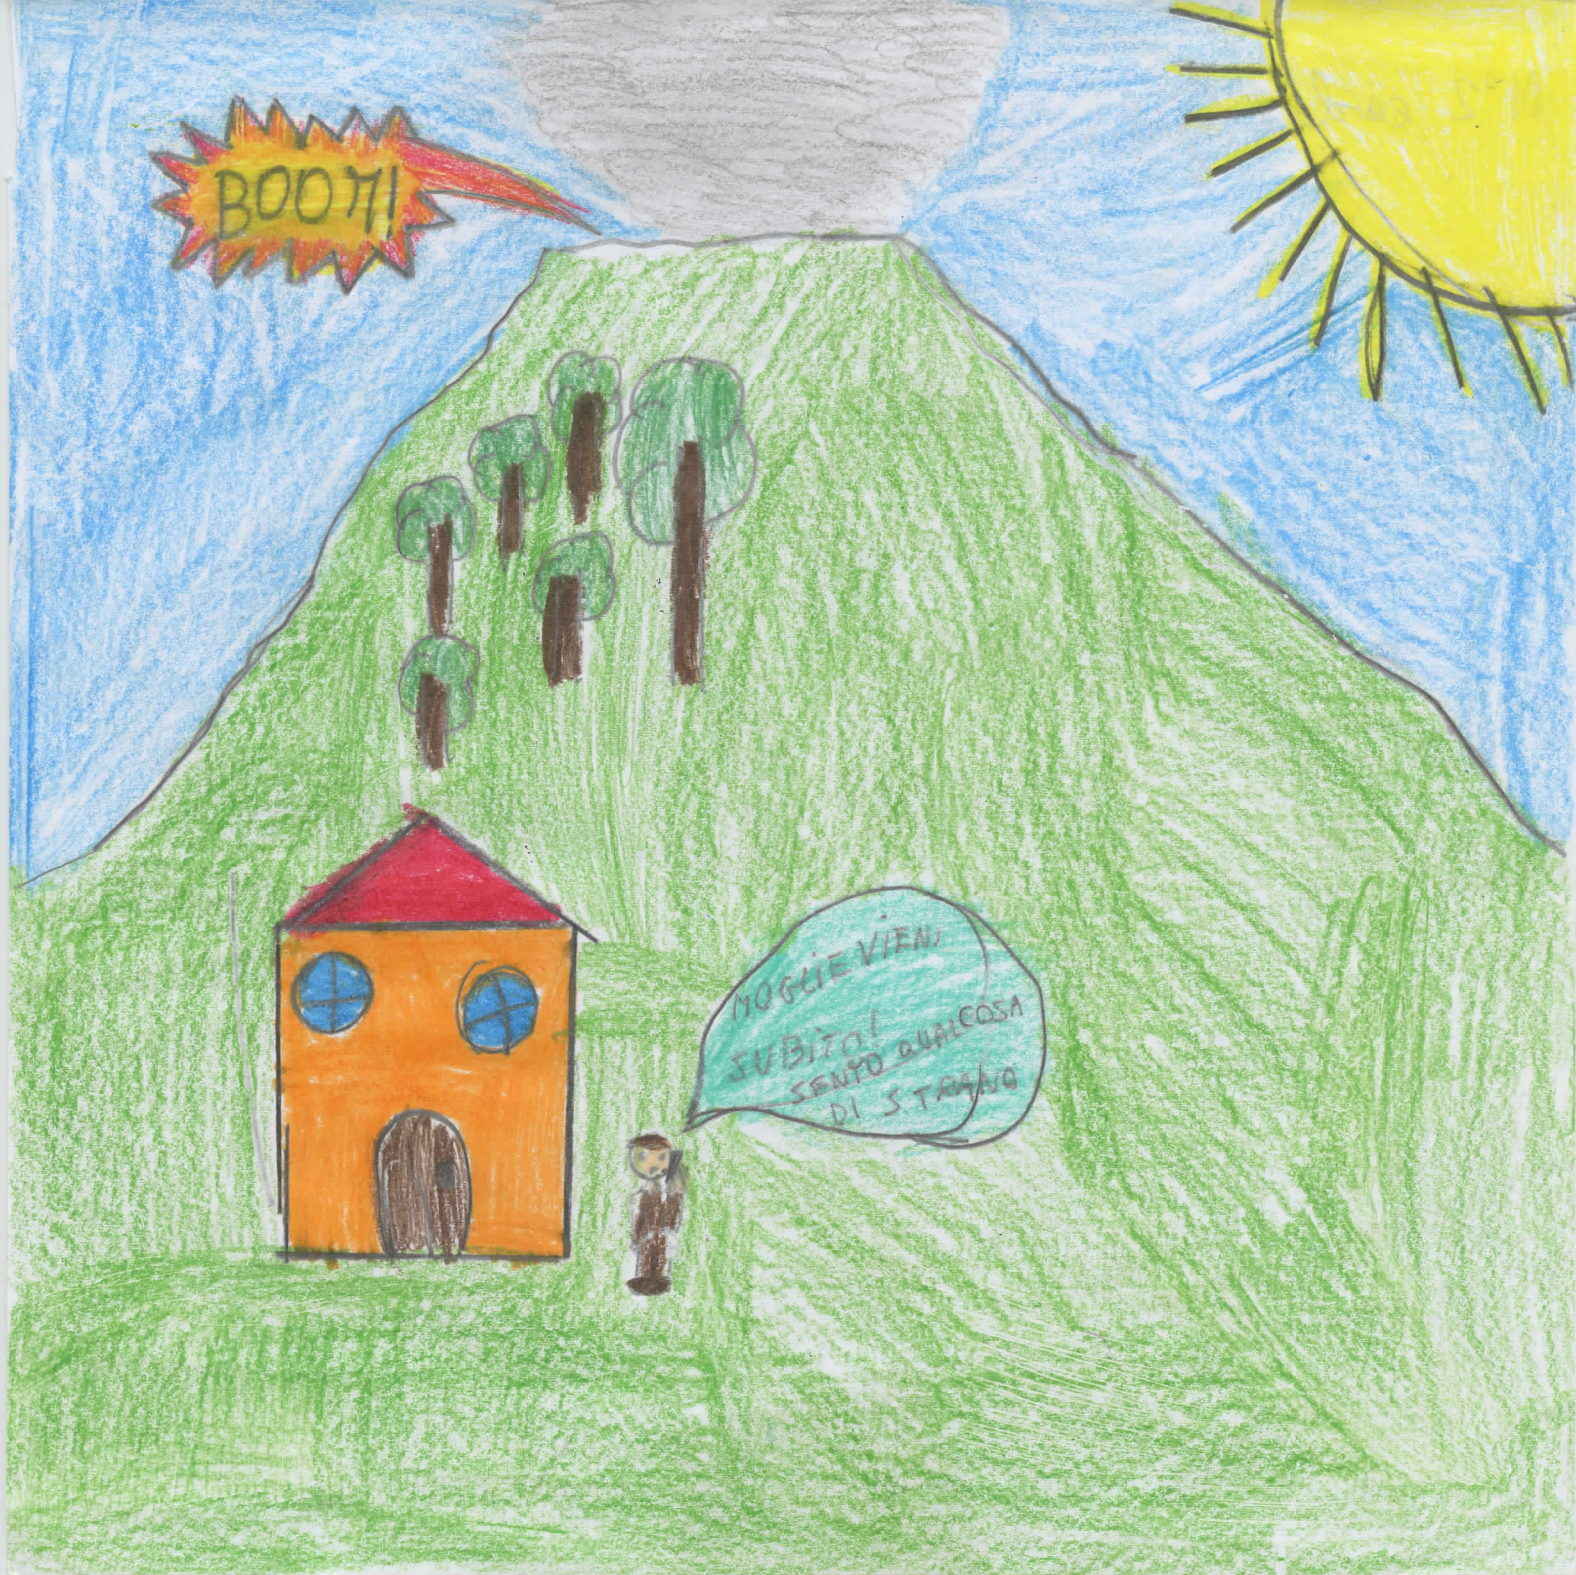

Il mugugnoio sente qualcosa di strano e chiama sua madre.

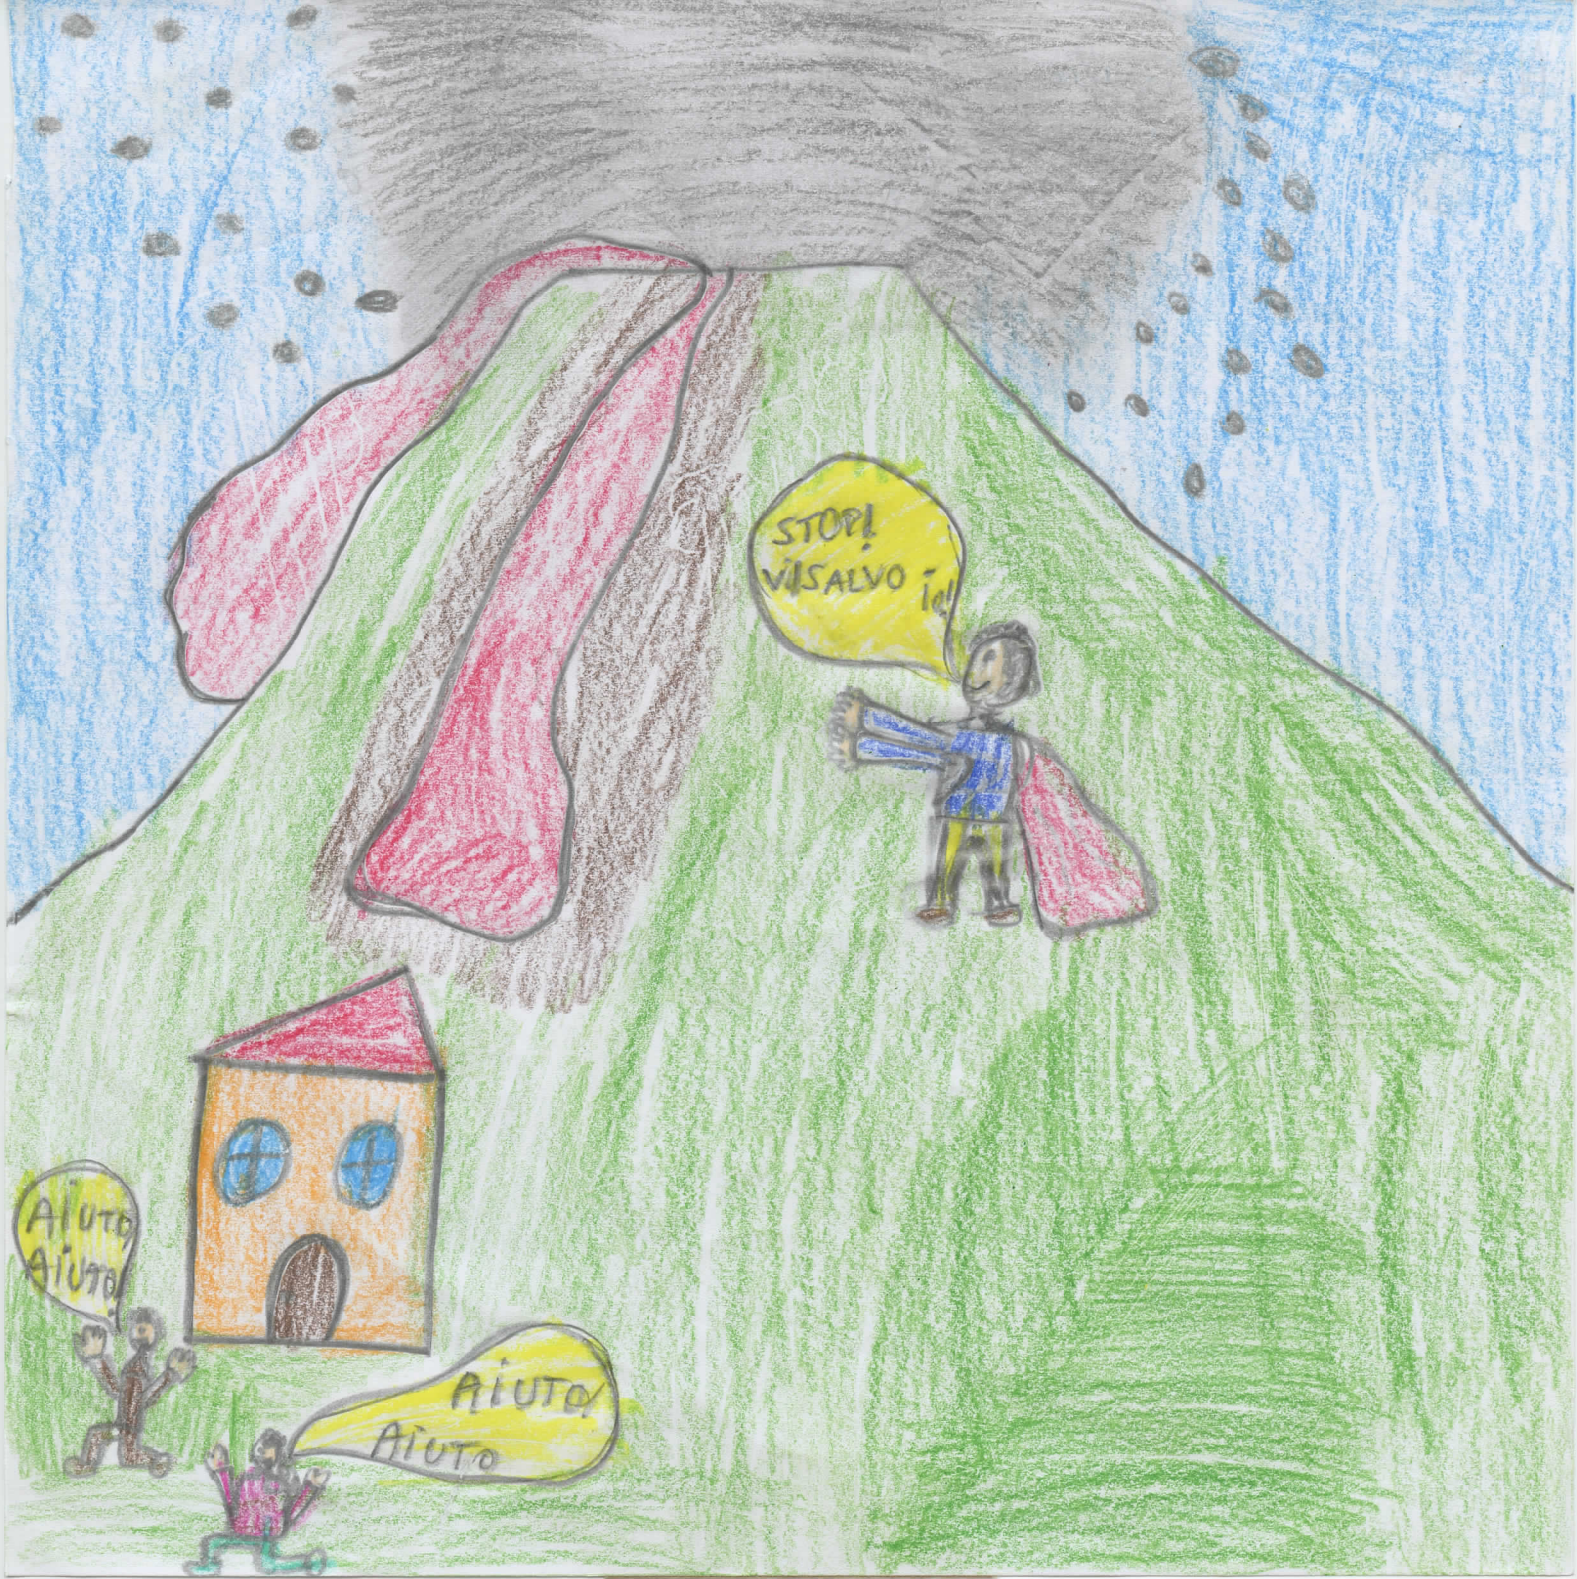

Dall'improvviso il vulcano eruttò il magma e la moglie scappò, nel frattempo  
arrivò una creatura magica che chiese se supercule bloccò  
la lava e li salvò

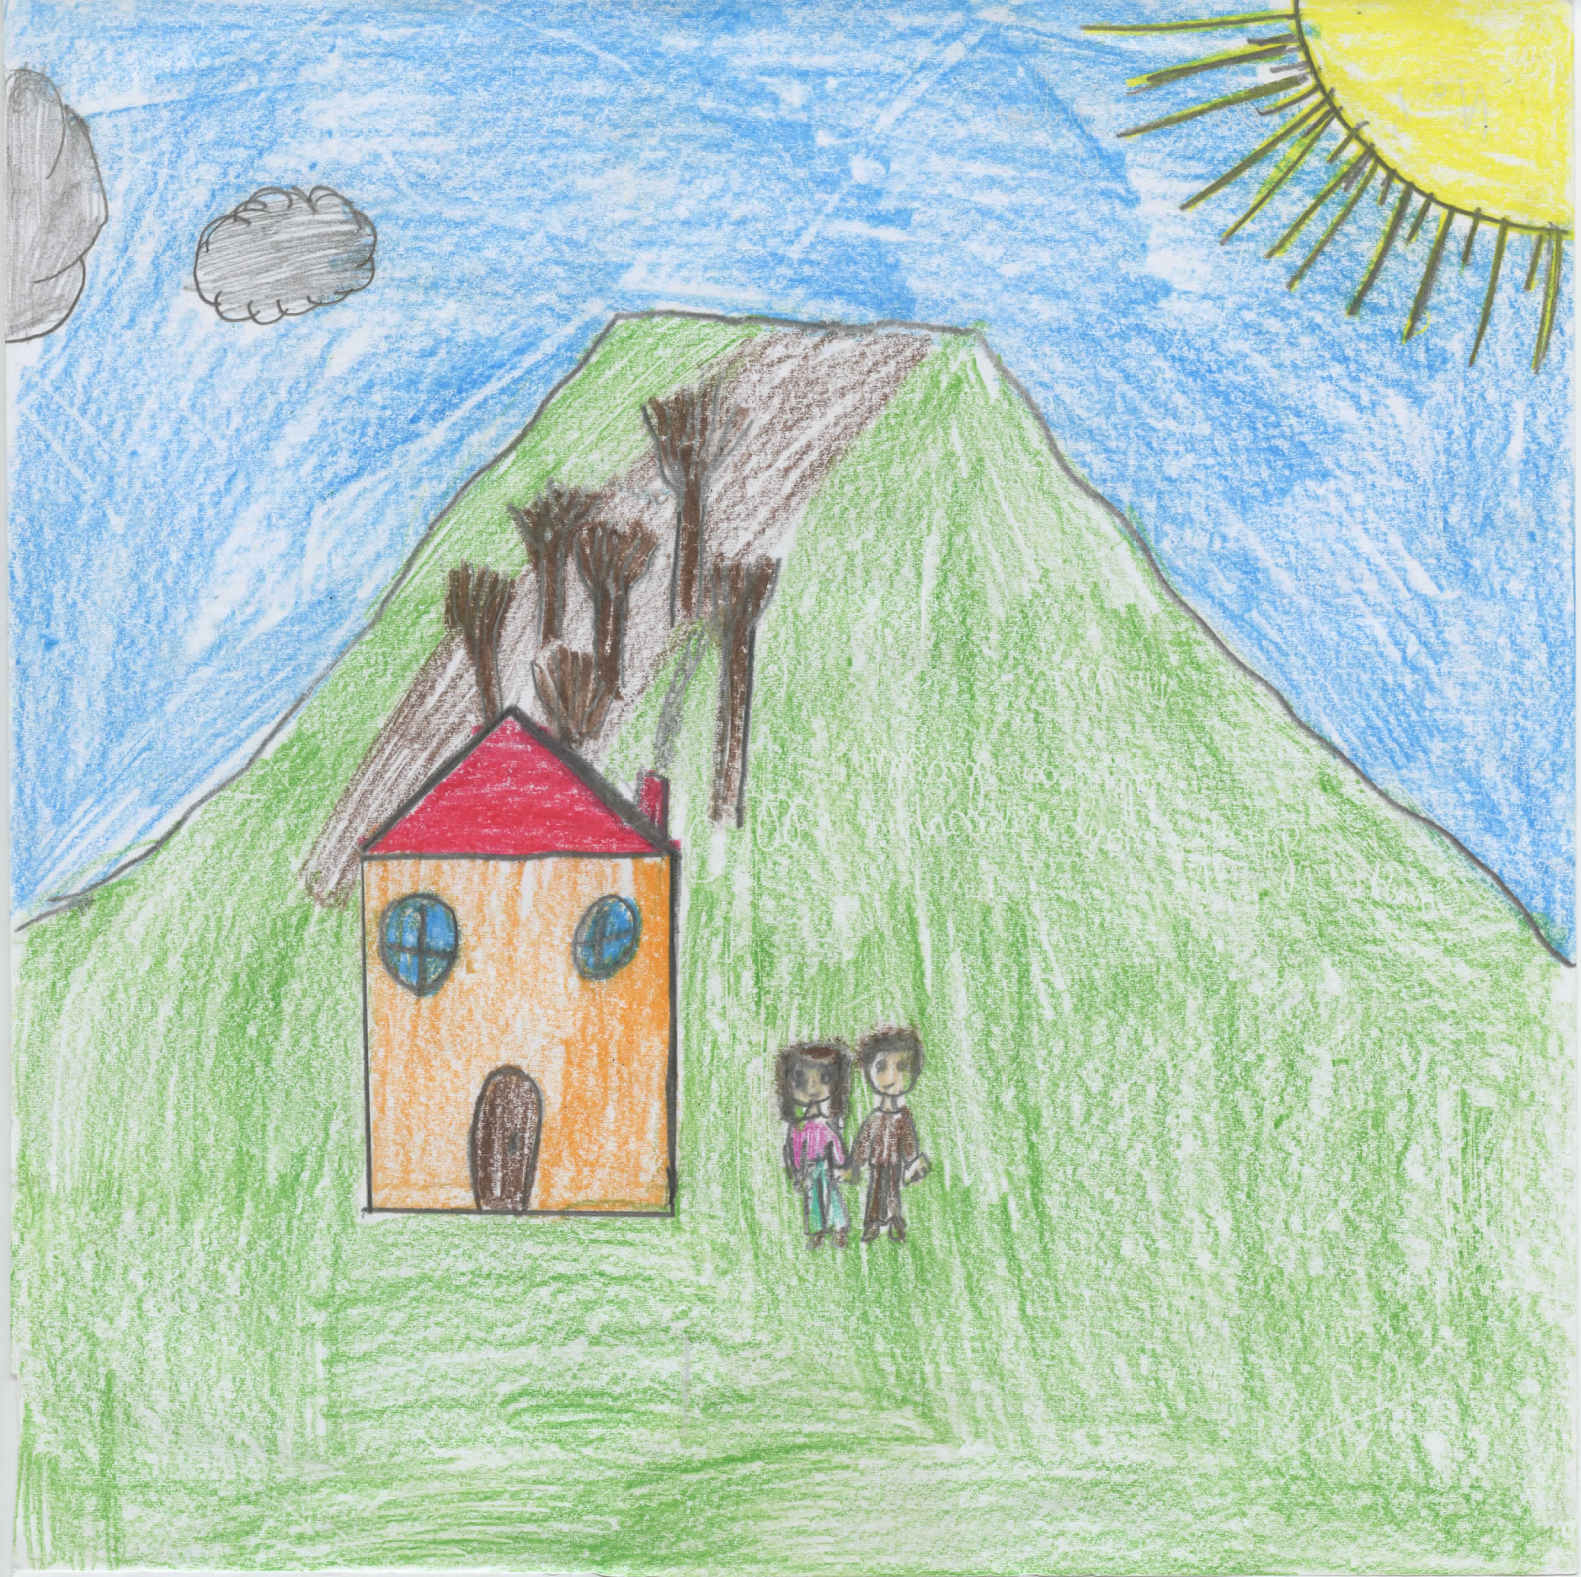

L'eruzione finì il mugnaio e sua moglie tornarono <sup>o cose</sup> ~~alla~~ ~~vissuta~~  
tutti felici e contenti.

**Supplement 1b.** Example story (frames 1-4) from Anonymous Student 2.

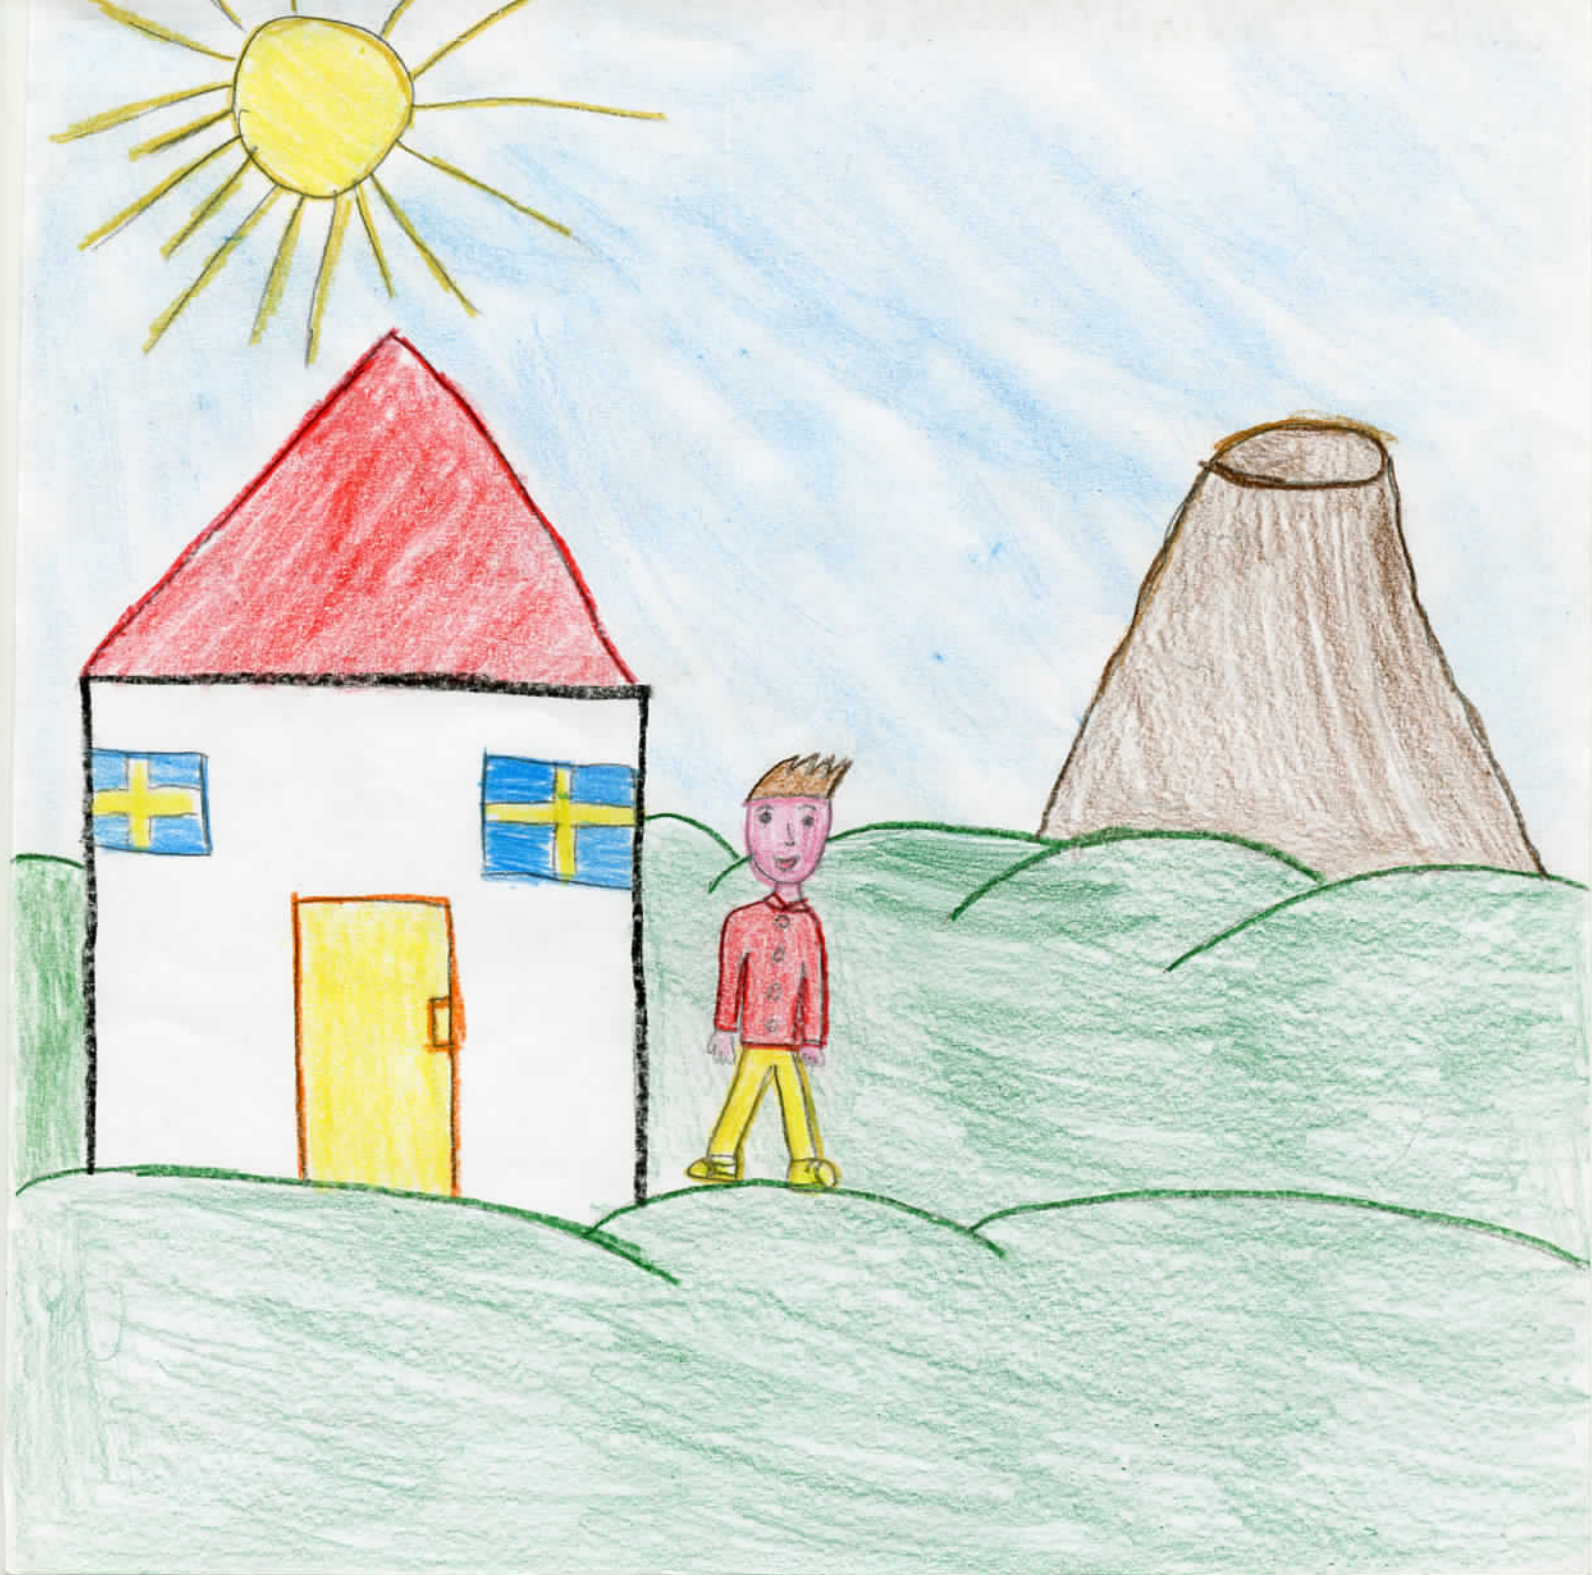

L'era una volta un bambino di nome Marco che visava vicino ad un vulcano, in una piccola casa.

Marco visava con i genitori, che lavoravano sempre, e quindi lui rimaneva quasi sempre da solo.

Lui era giocherellone, scherzoso e amava il calcio.



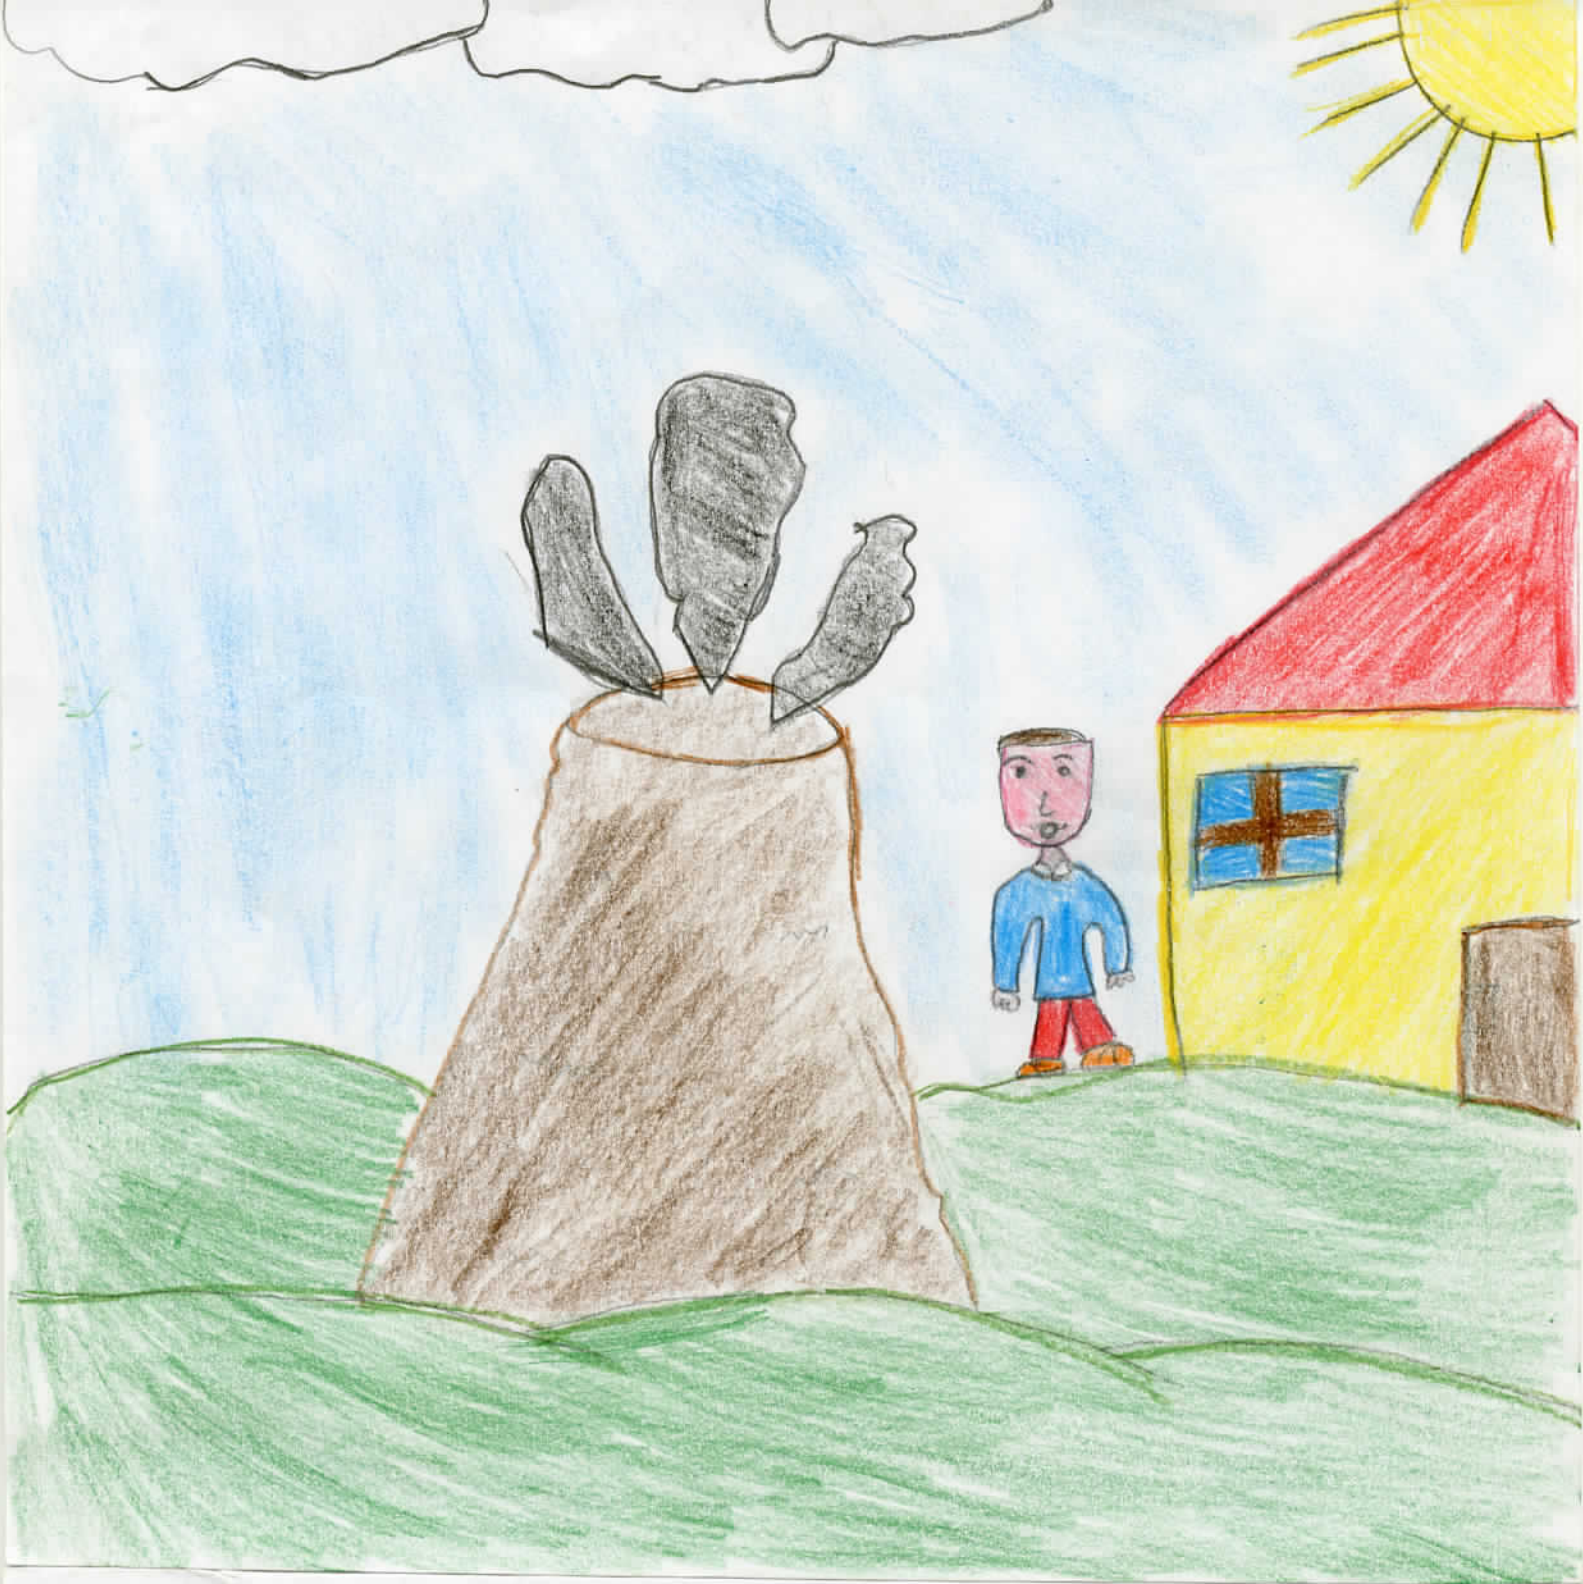

All' improvviso mentre il bambino guardava la TV. senti un odore di bruciato e si precipitò dall' amico e mentre andava vide il vulcano pieno di fumo e cominciò a correre. ~~Il bambino~~  
Dopo averlo detto al bambino lo disse a tutta la città e ritornò a casa impaurito.

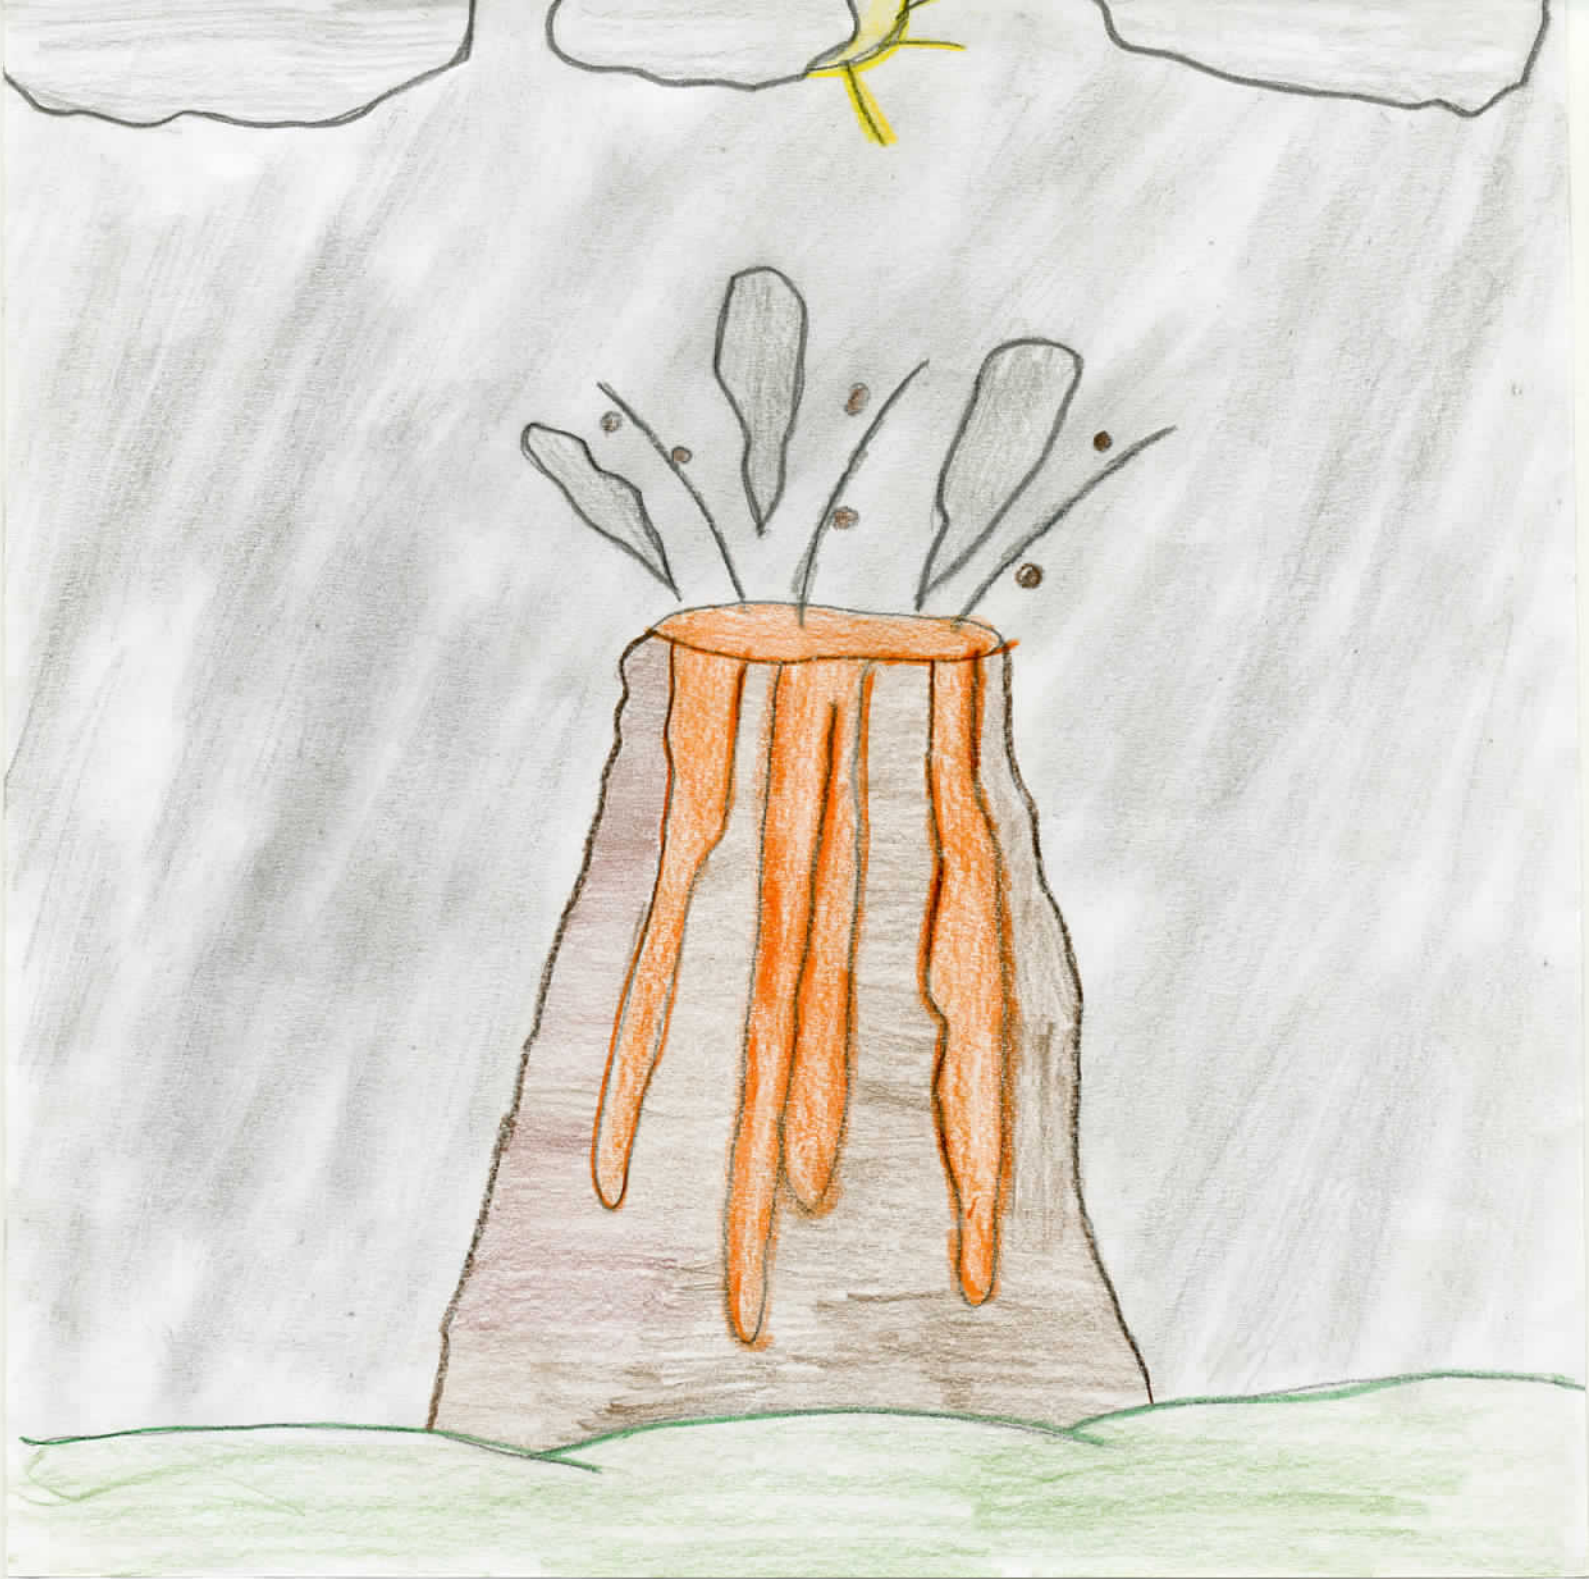

Stanza tornando da scuola e vide che il vulcano stava eruttando e si allarmò, cominciò ad urlare per tutta la città, mentre stanza eruttando la città, Marco incontrò il suo amico che lo aiutò a scappare via. Molta gente fu ferita e se ne andò e scampò il pericolo.

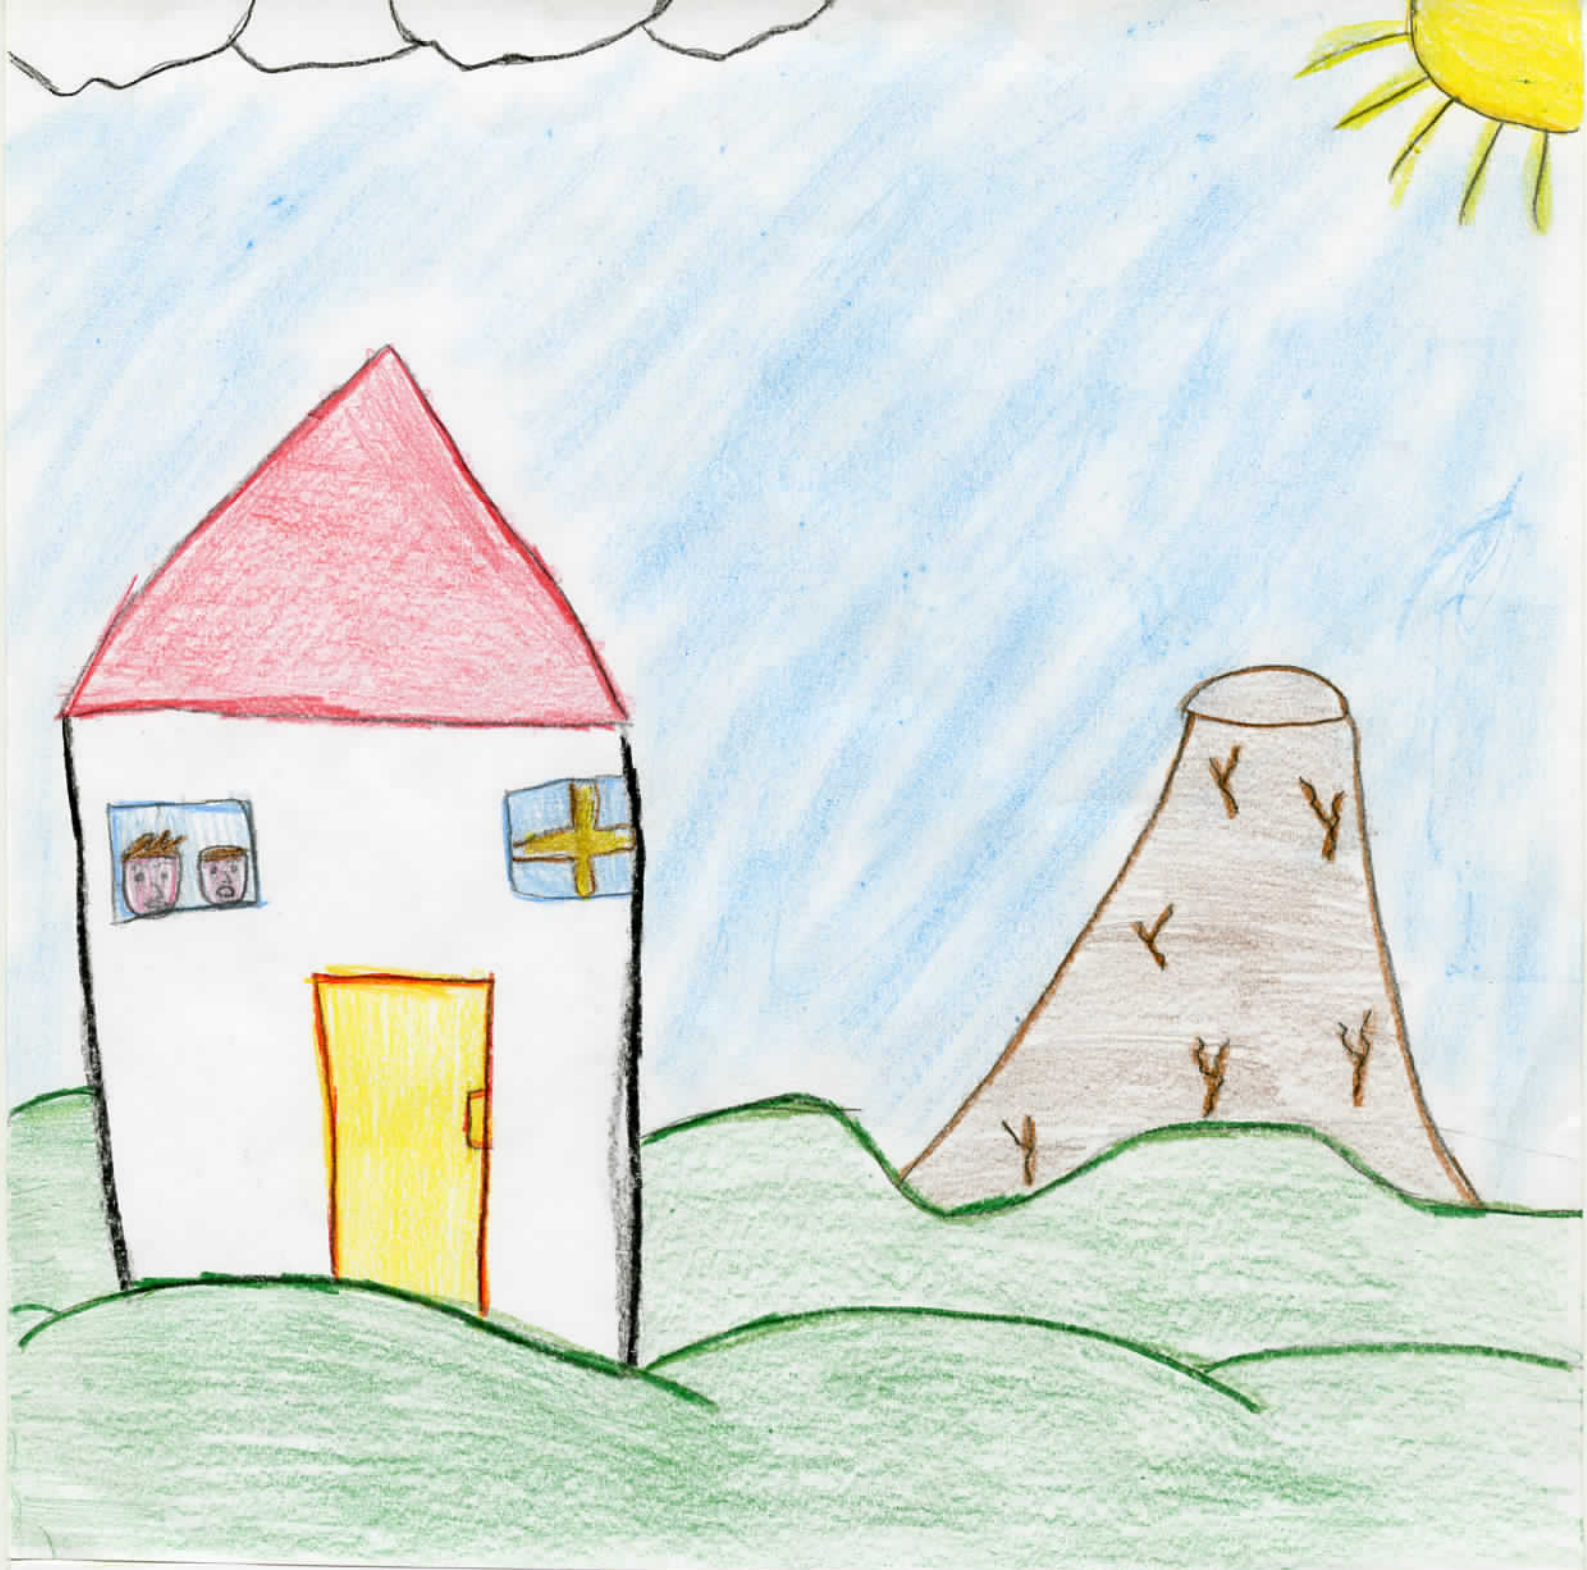

Marco e il suo amico erano chiusi dentro e assai impauriti, il Bombino vide dalla finestra, che il vulcano aveva finito di eruttare e ~~vide anche~~ che tutto il paesaggio era distrutto. Marco e il suo amico ~~erano~~ per fortuna erano ~~salvi~~ salvi ~~espressi~~. Il Bombino quando vide i genitori di ~~Salvatore~~ l'avventura di Marco finì qui.

**Supplement 1c.** Example story (frames 1-4) from Anonymous Student 3.

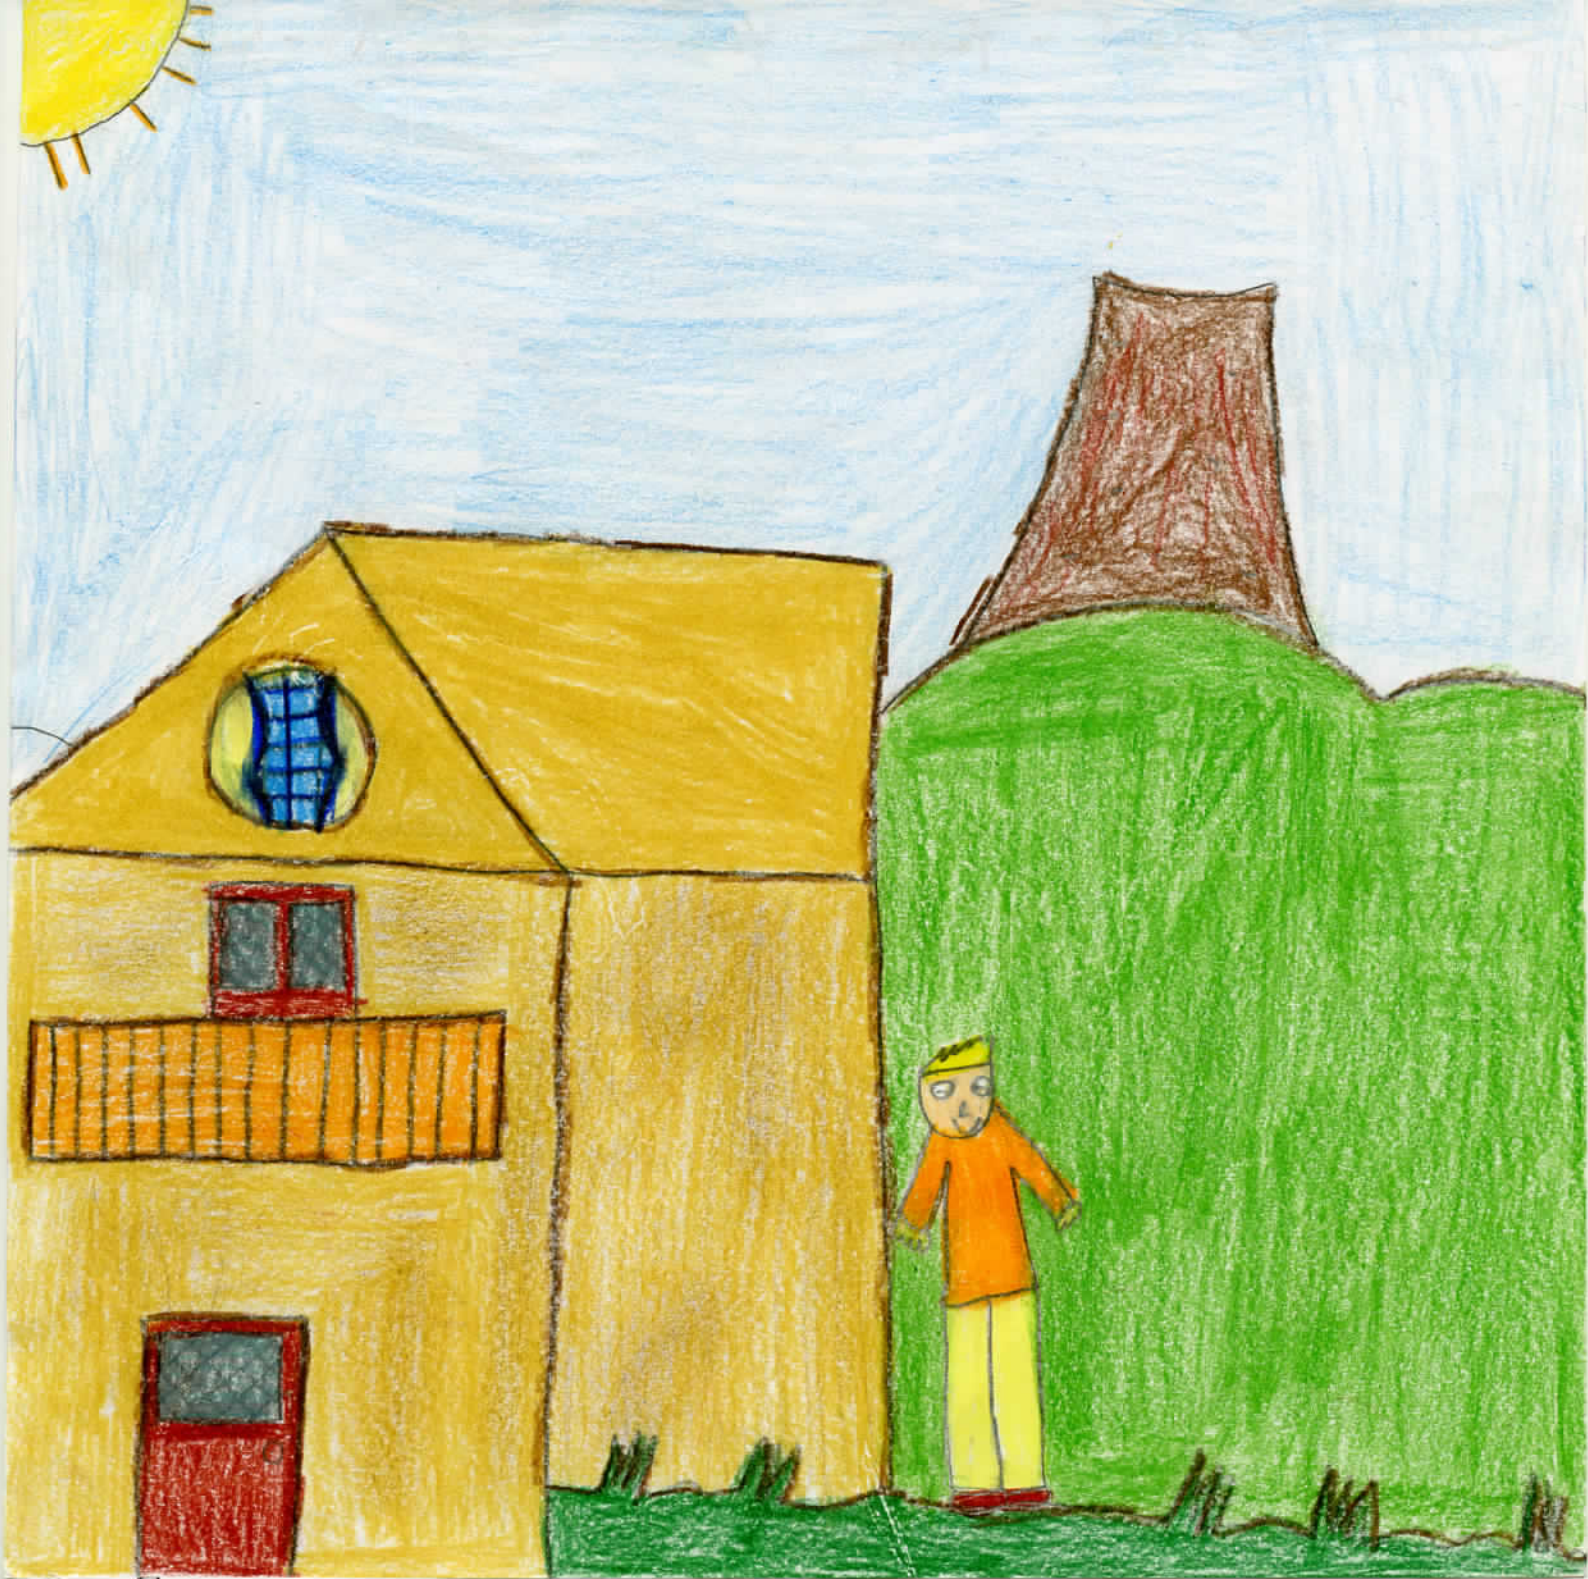

~~Questo ragazzo di nome Oscar vive vicino al vulcano di nome Etna.~~  
QUESTO ragazzo DI NOME OSCAR VIVE VICINO AL VULCANO  
DI NOME ETNA

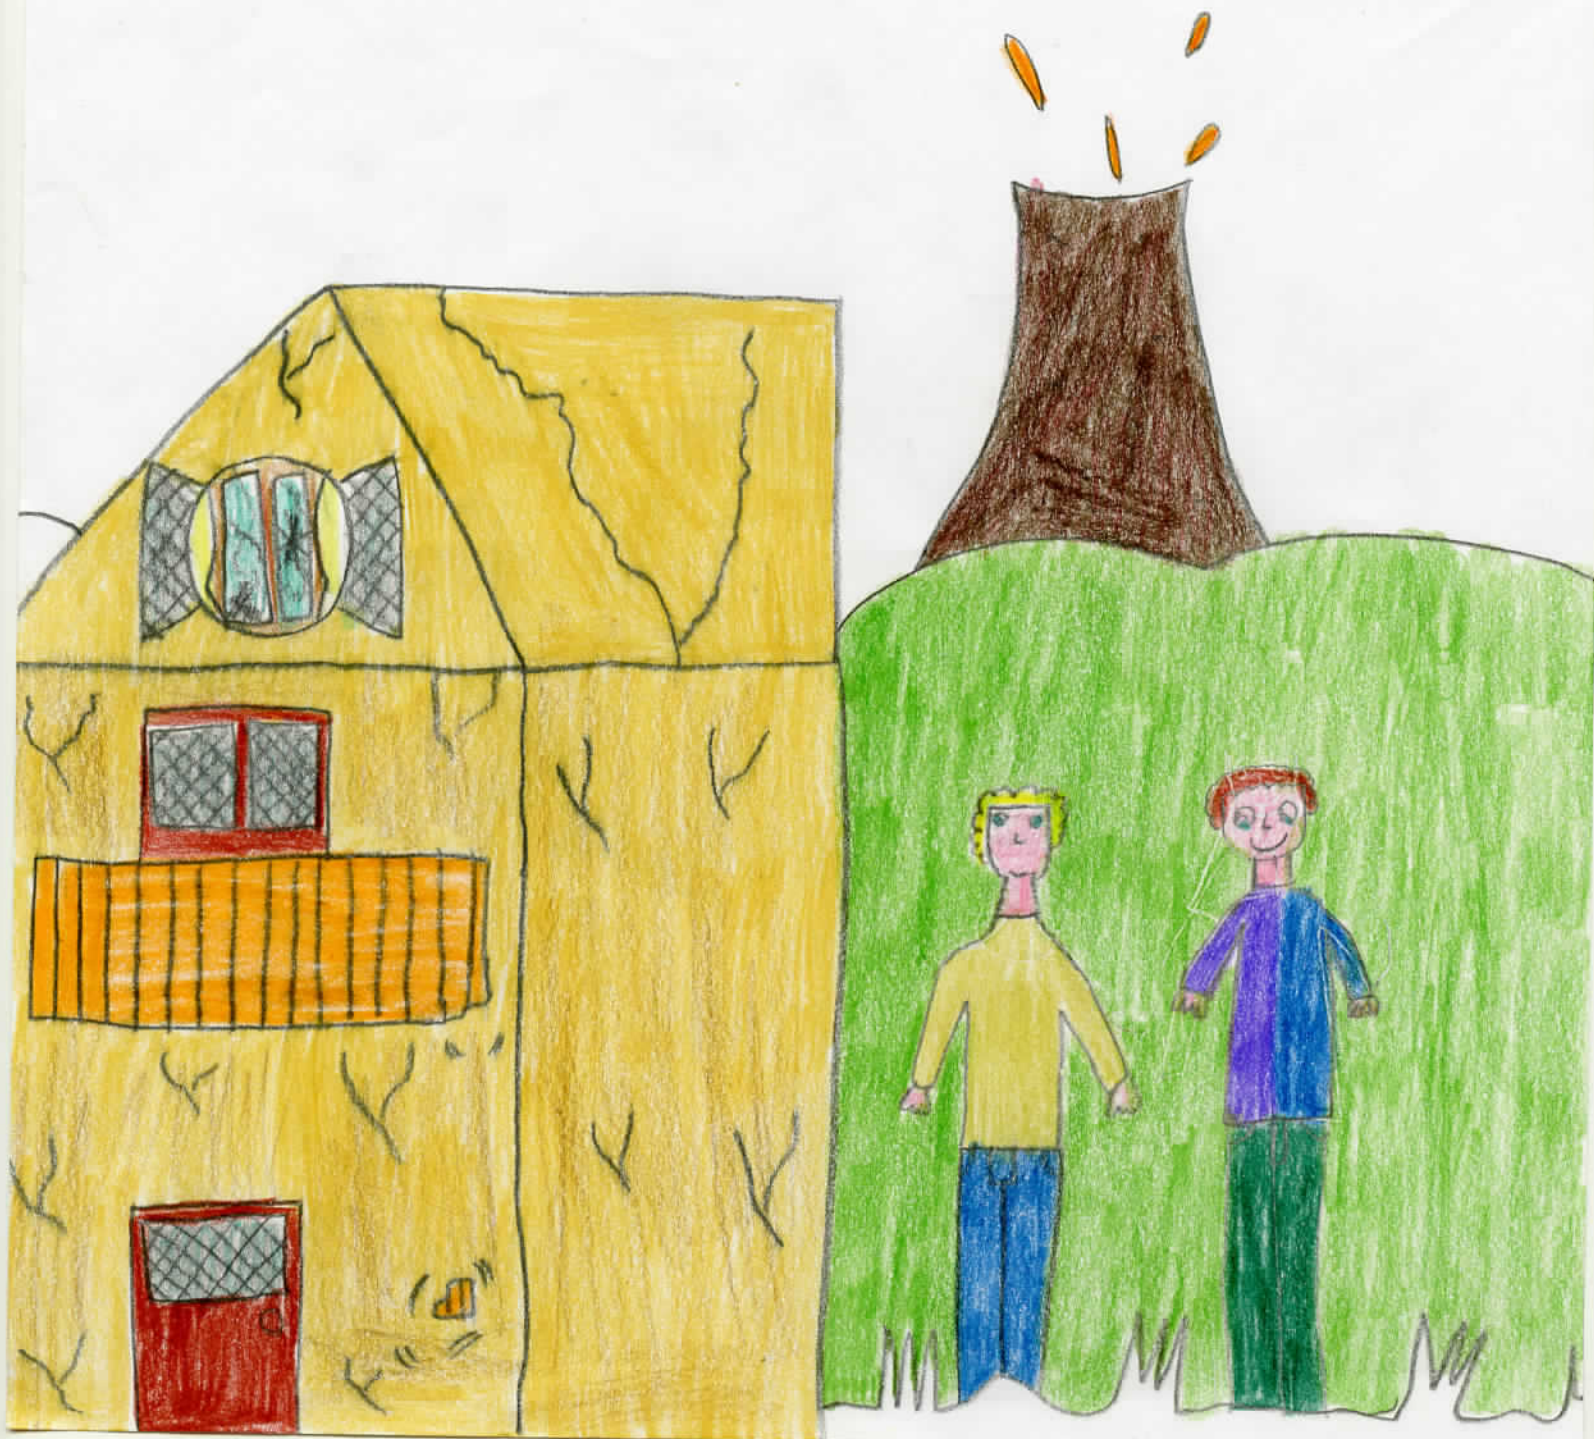

OSCAR SENTE DELLE SCOSSE DI TERREMOTO, ENE VA A PARLARE  
CON SUO PADRE, SI SPAVENTA E GLI VIENE LA VOGLIA DI  
SCAPPARE MA NON LO FA PERCHÉ IL PADRE GLI ELO ~~NEGA~~.  
IMPEDISCE

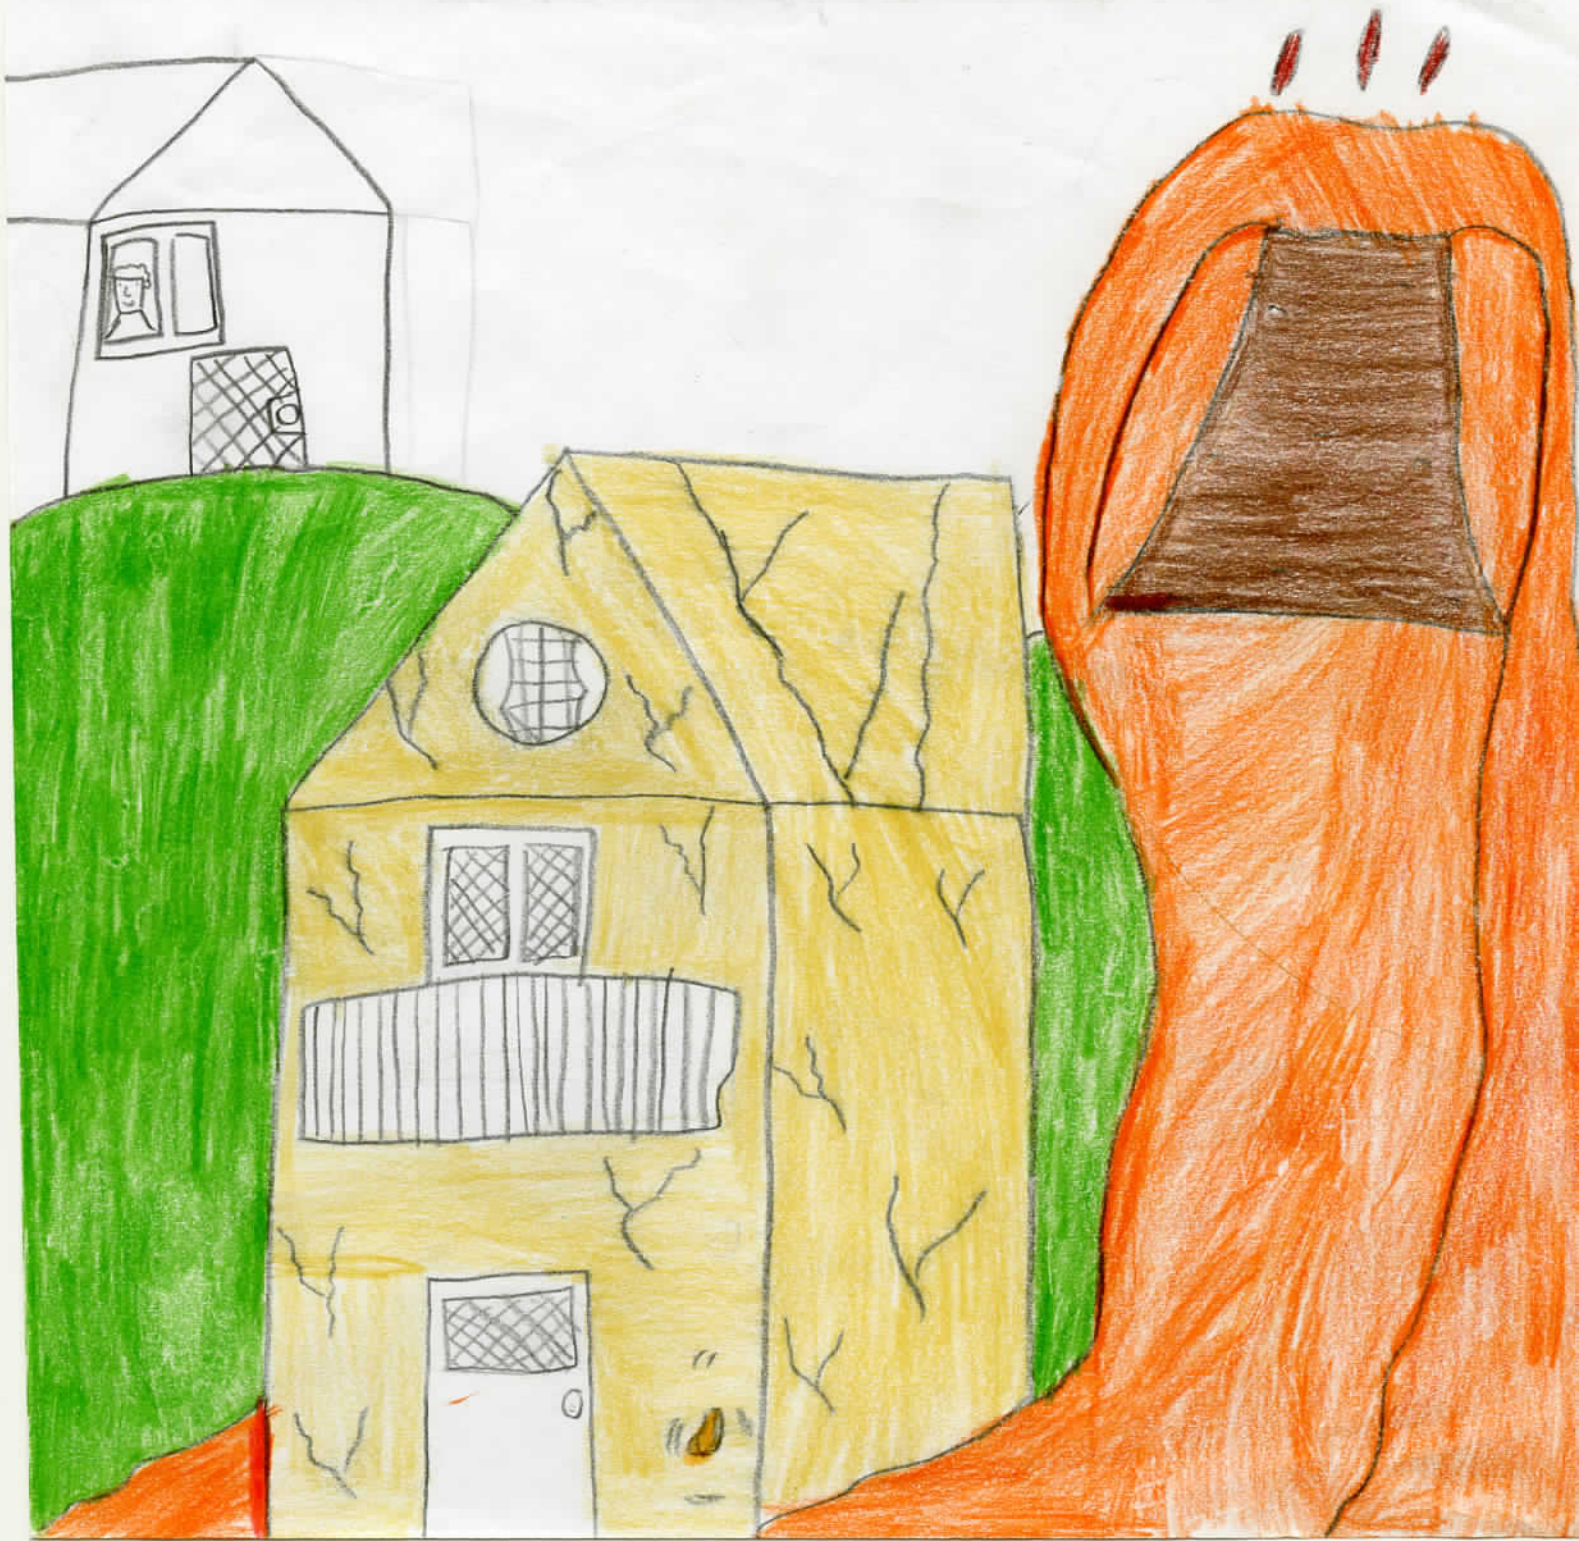

OSCAR VA DALLA NONNA CHE VIVE SU UNA  
MONTAGNA. DURANTE L'ERUZIONE OSCAR SCAPPA CON LA  
NONNA

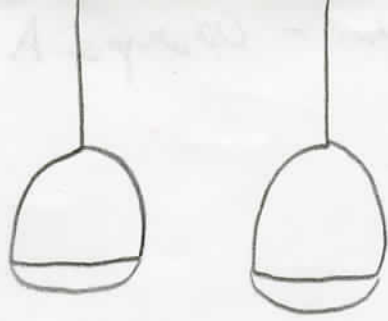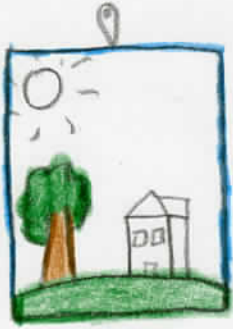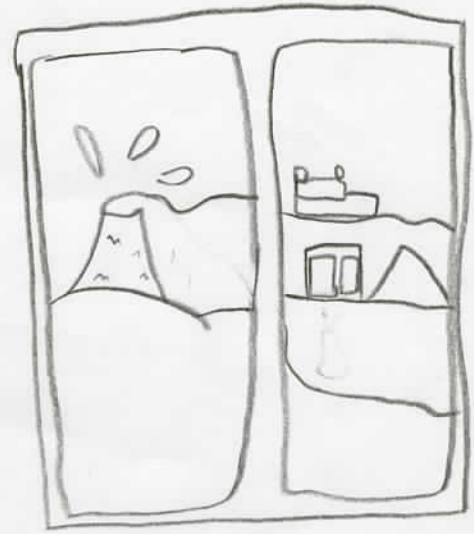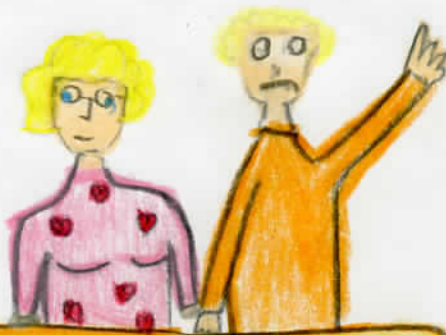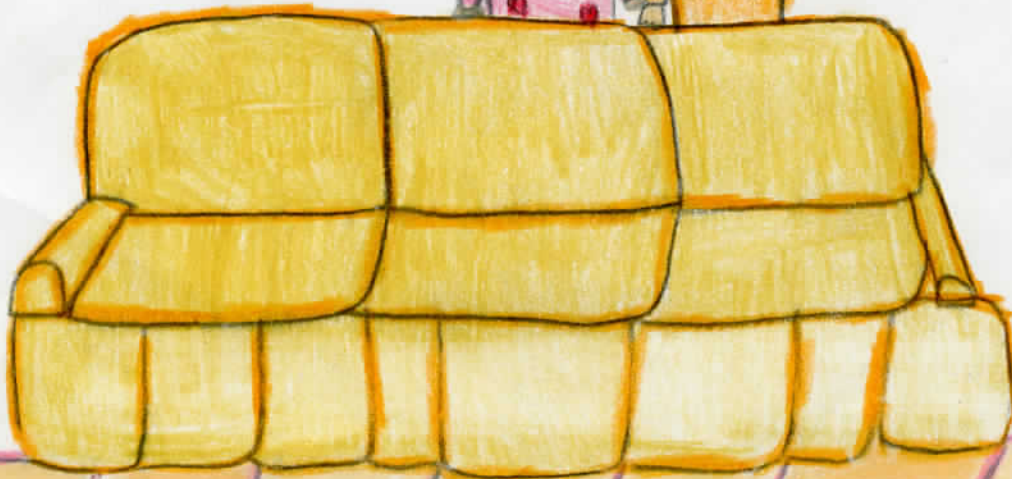

IL PROTAGONISTA STA DALLA NONNA. OSCAR STA BENE. OSCAR  
GUARDA DALLA FINESTRA LA SUA CASA. LA SUA CASA È ~~ROVULATA~~ ~~ROVULATA~~



**Supplement 1d.** Example story (frames 1-4) from Anonymous Student 4.

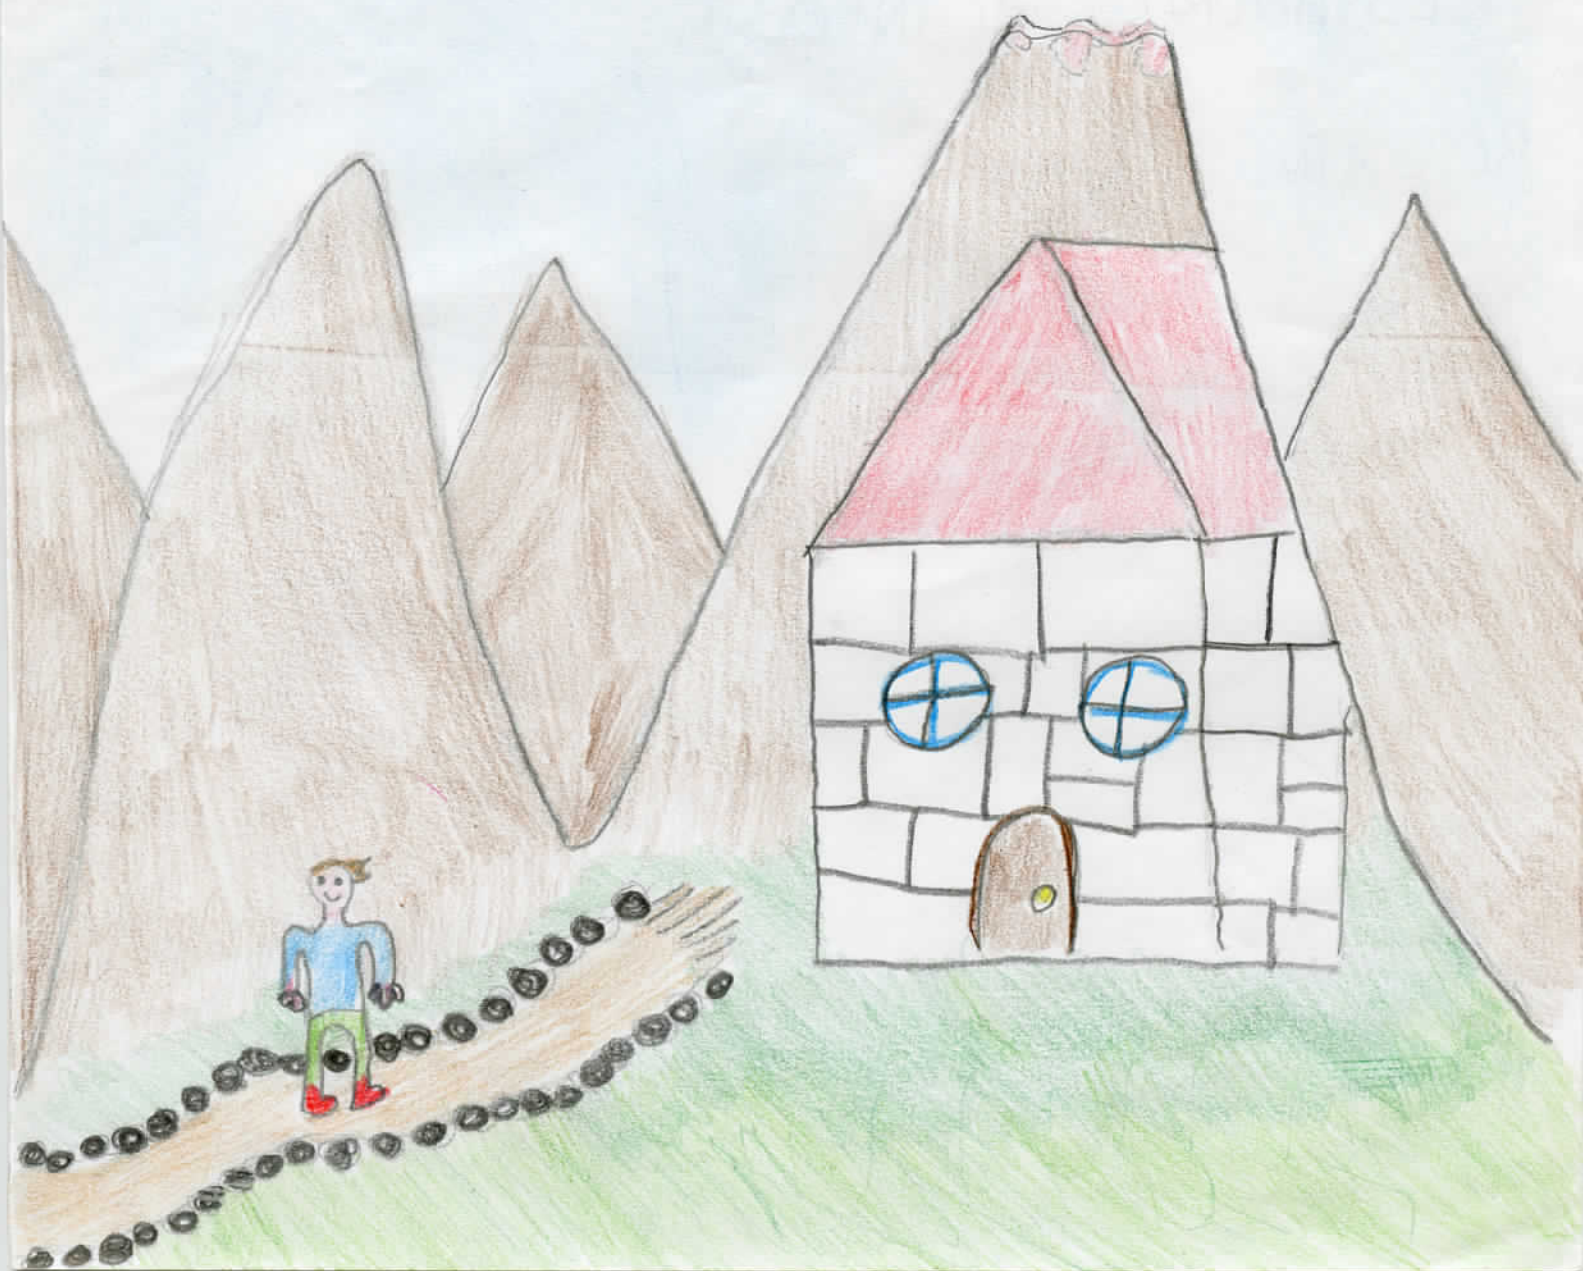

C'era una volta un uomo di nome Eugenio, esso  
abitava in un vulcano.

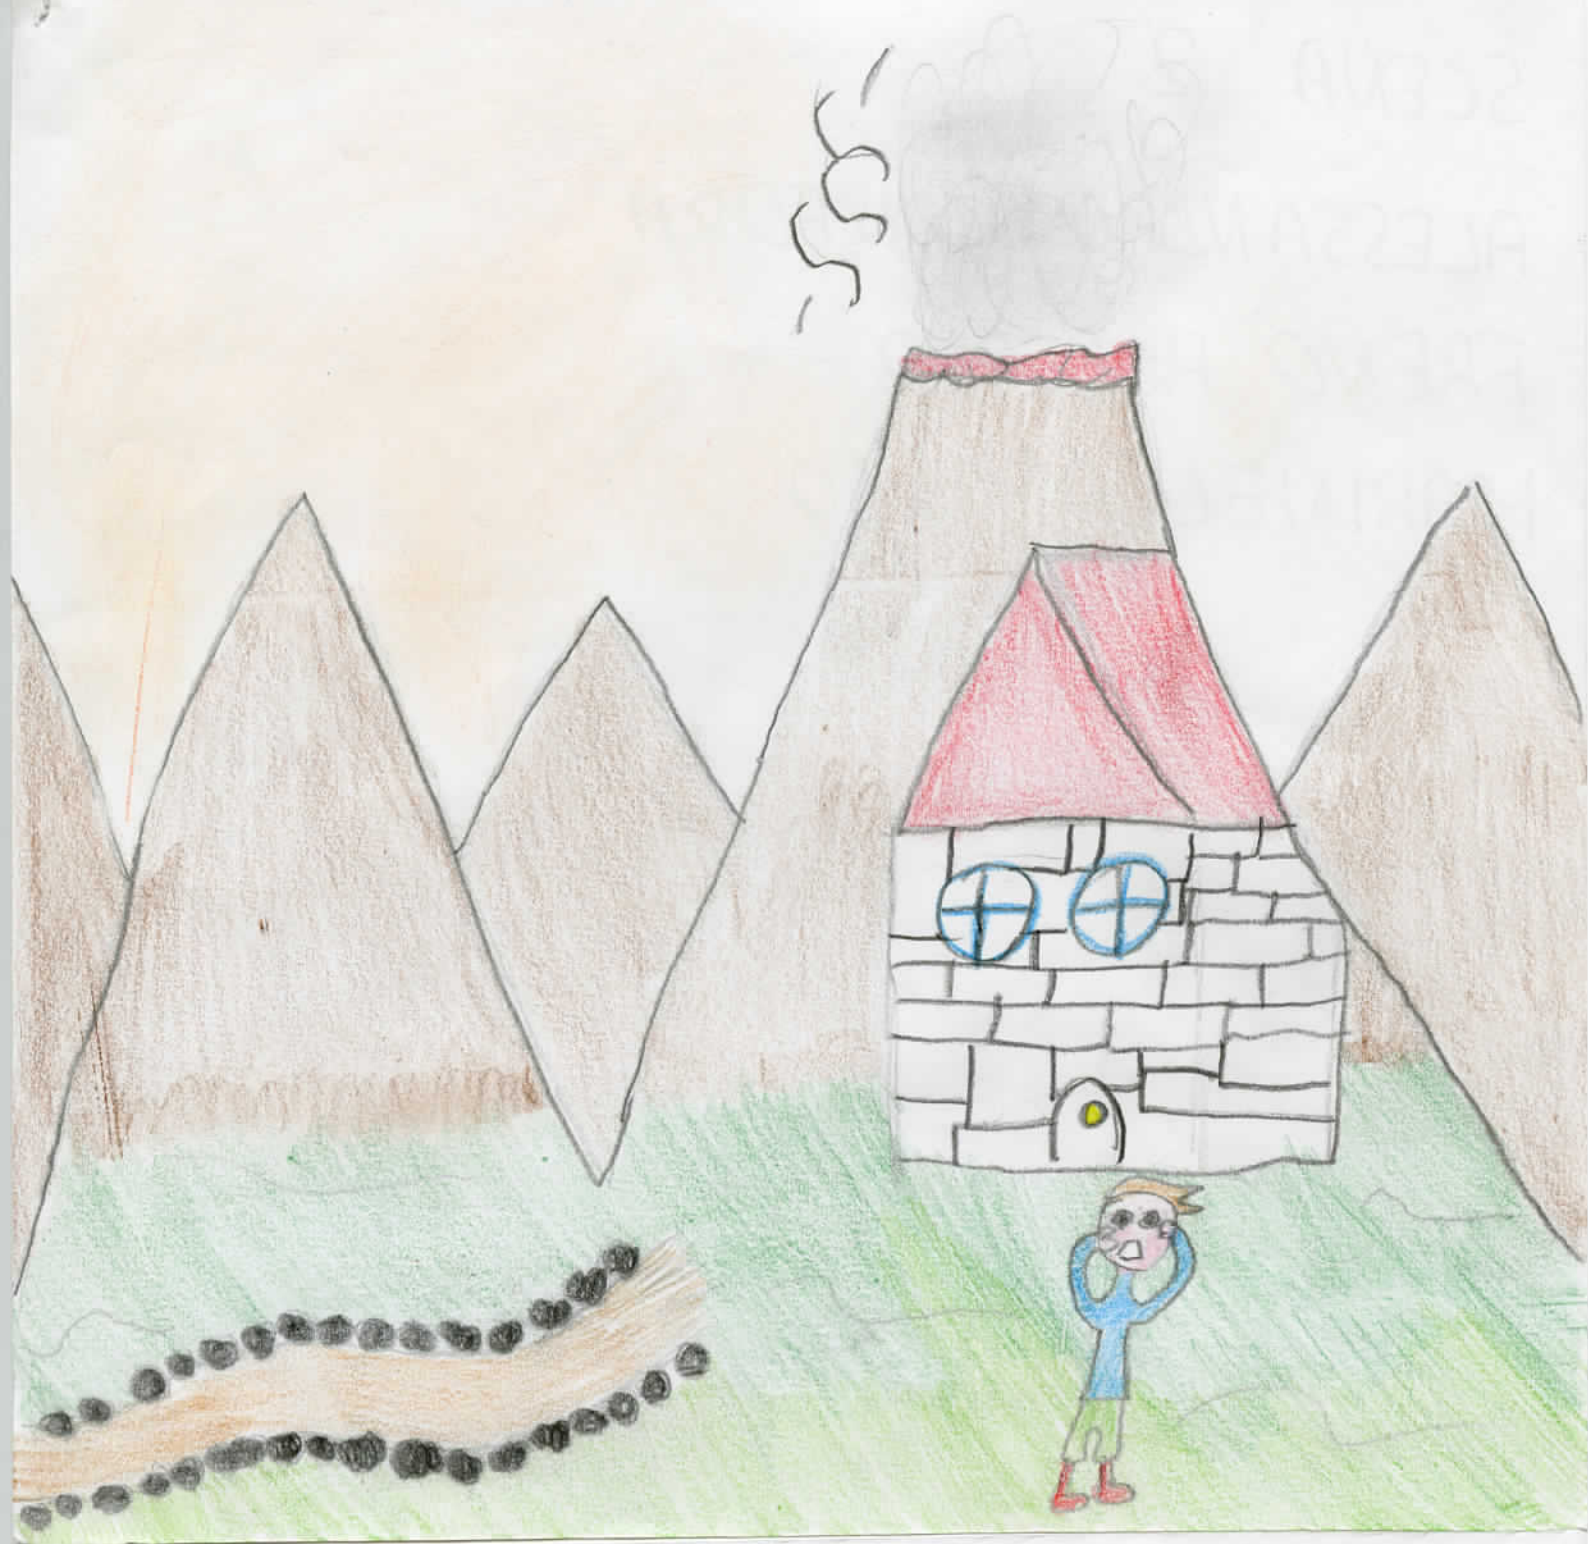

Dopo un po' Eugenio si accorse che la Terra  
tremava e cominciò ad uscire il fumo dal vulcano.  
Poi chiamò il 115 e li aspetta con molta pazienza.

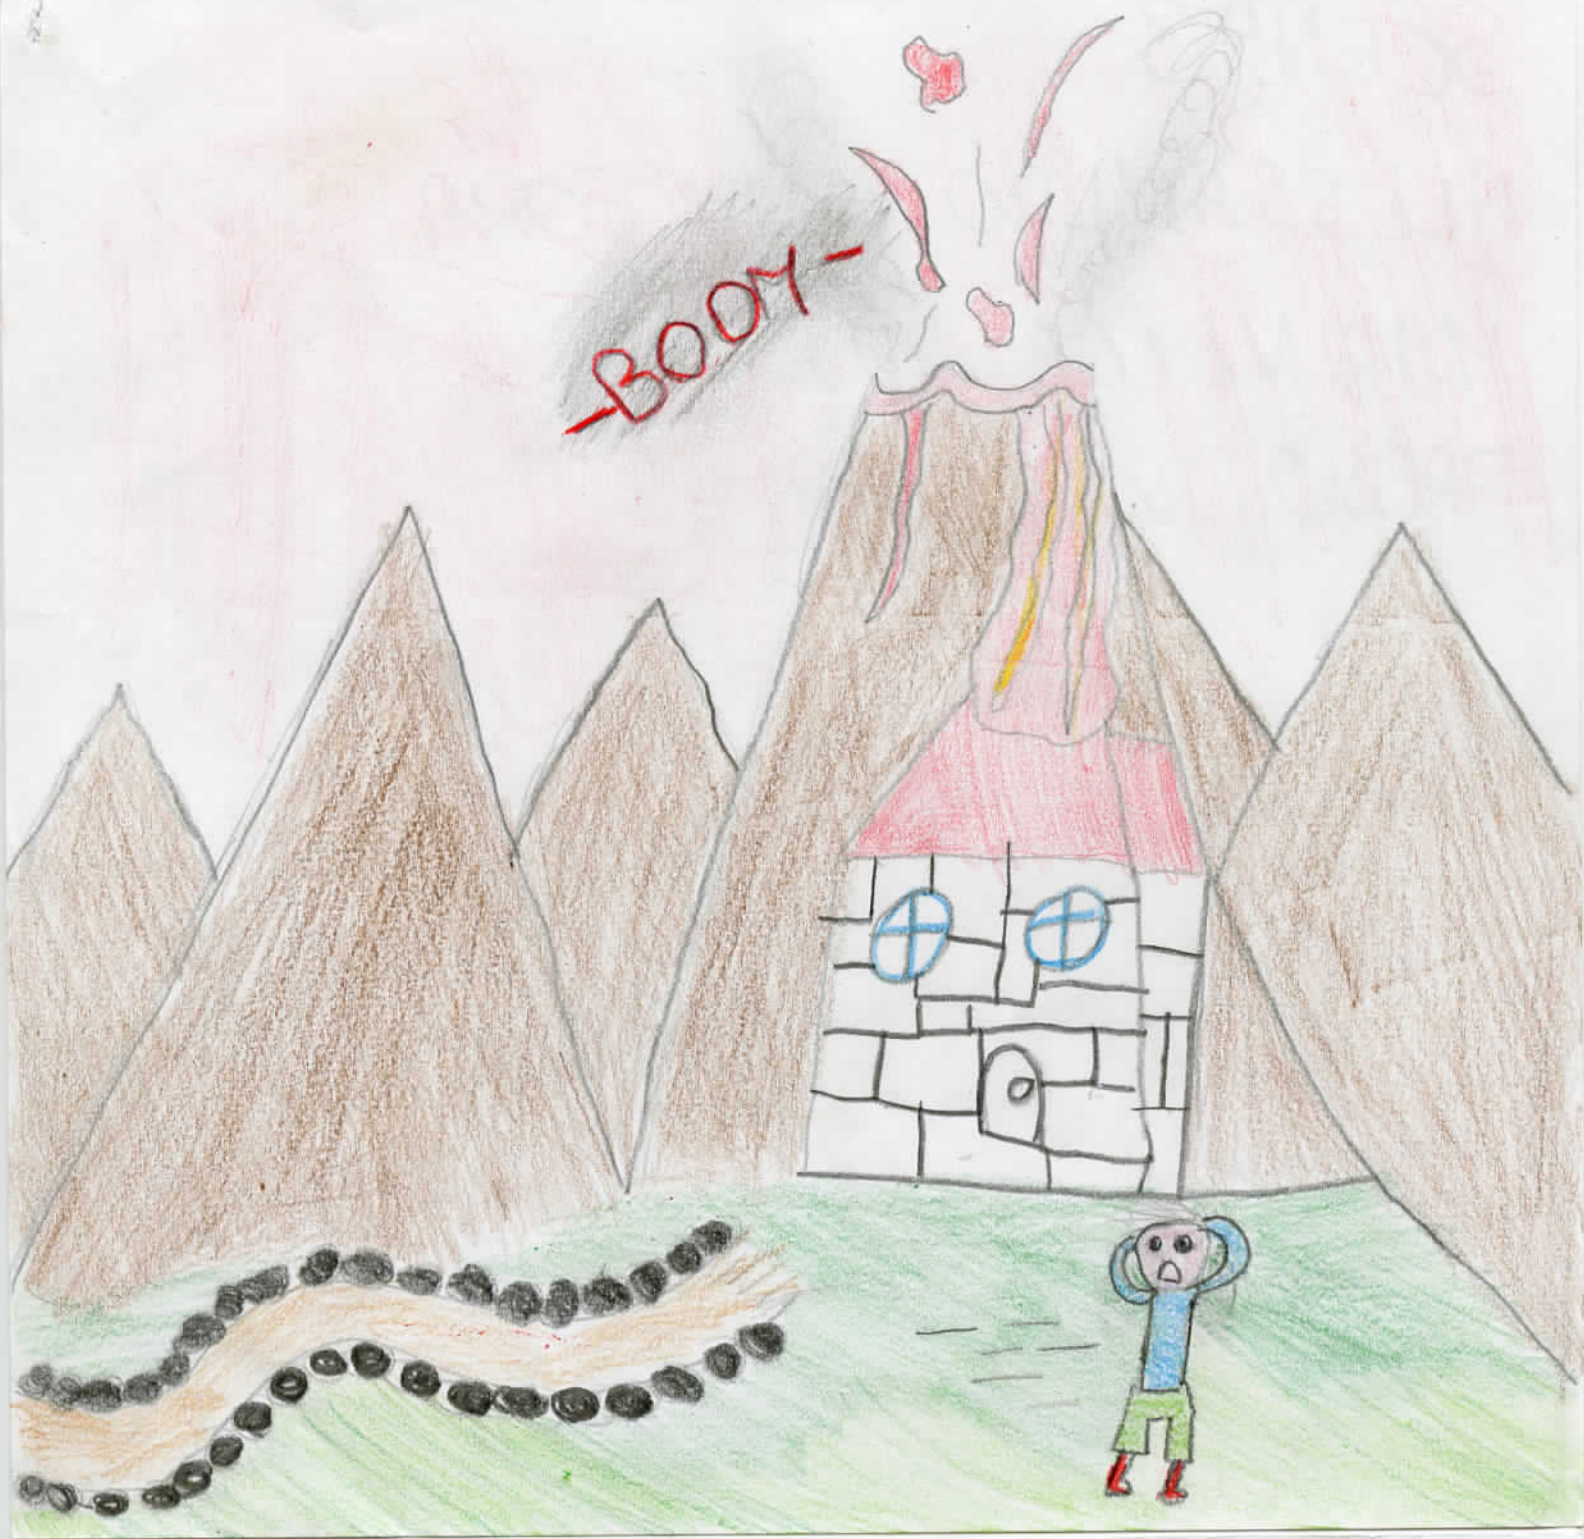

Oh no! Il vulcano sta eruttando, mentre i pompieri stanno cercando il signor Eugenio corra a destra e a sinistra cercando una soluzione.

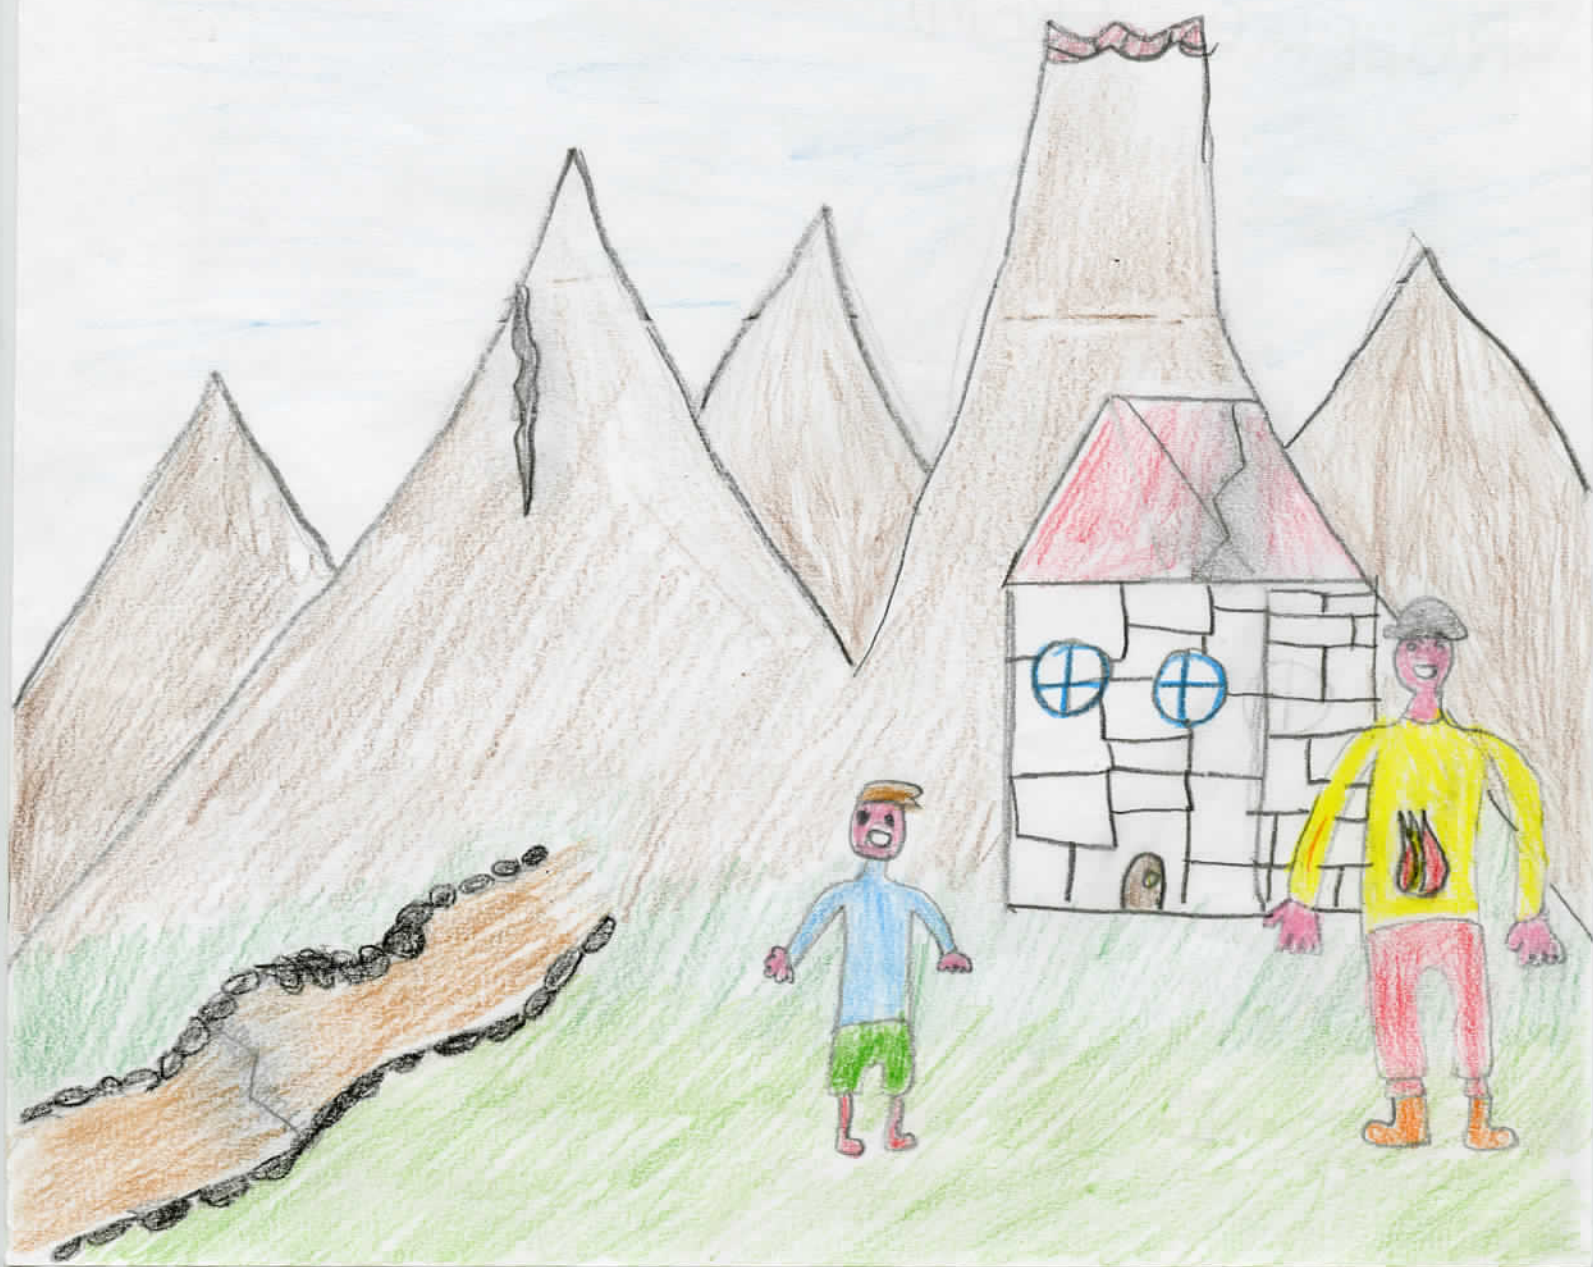

La fine di tutto! Il vulcano ha smesso di eruttare  
però l'ambiente è pieno di macerie e pietre  
infuocate. I pompieri hanno calmato Eugenio e  
raccolto le macerie.

## **Supplement 2 - Frame 1 - The story's setting**

Selected examples of the stories' first frame, describing the story's setting.

Drawings were realized by the pupils of primary and secondary schools listed in Table 1. The schools' enrolment into the project was discussed by schools' board and then presented to the families at the beginning of the school year, as a part of the school curriculum (Piano Triennale di Offerta Formativa). We did not collect any personal information about the participating students who always worked in pairs or small groups. Students were explicitly asked not to print their full names on their compositions. The production of text and drawings was not compulsory and students were free to decide the degree of their involvement in the exercise. The stories we collected were freely donated to be used for research purposes such as the present manuscript. Originals are kept into the Edurisk archives.

The supplement is provided as a portfolio, with examples of the collected materials.

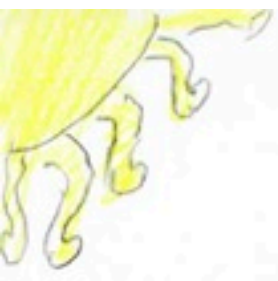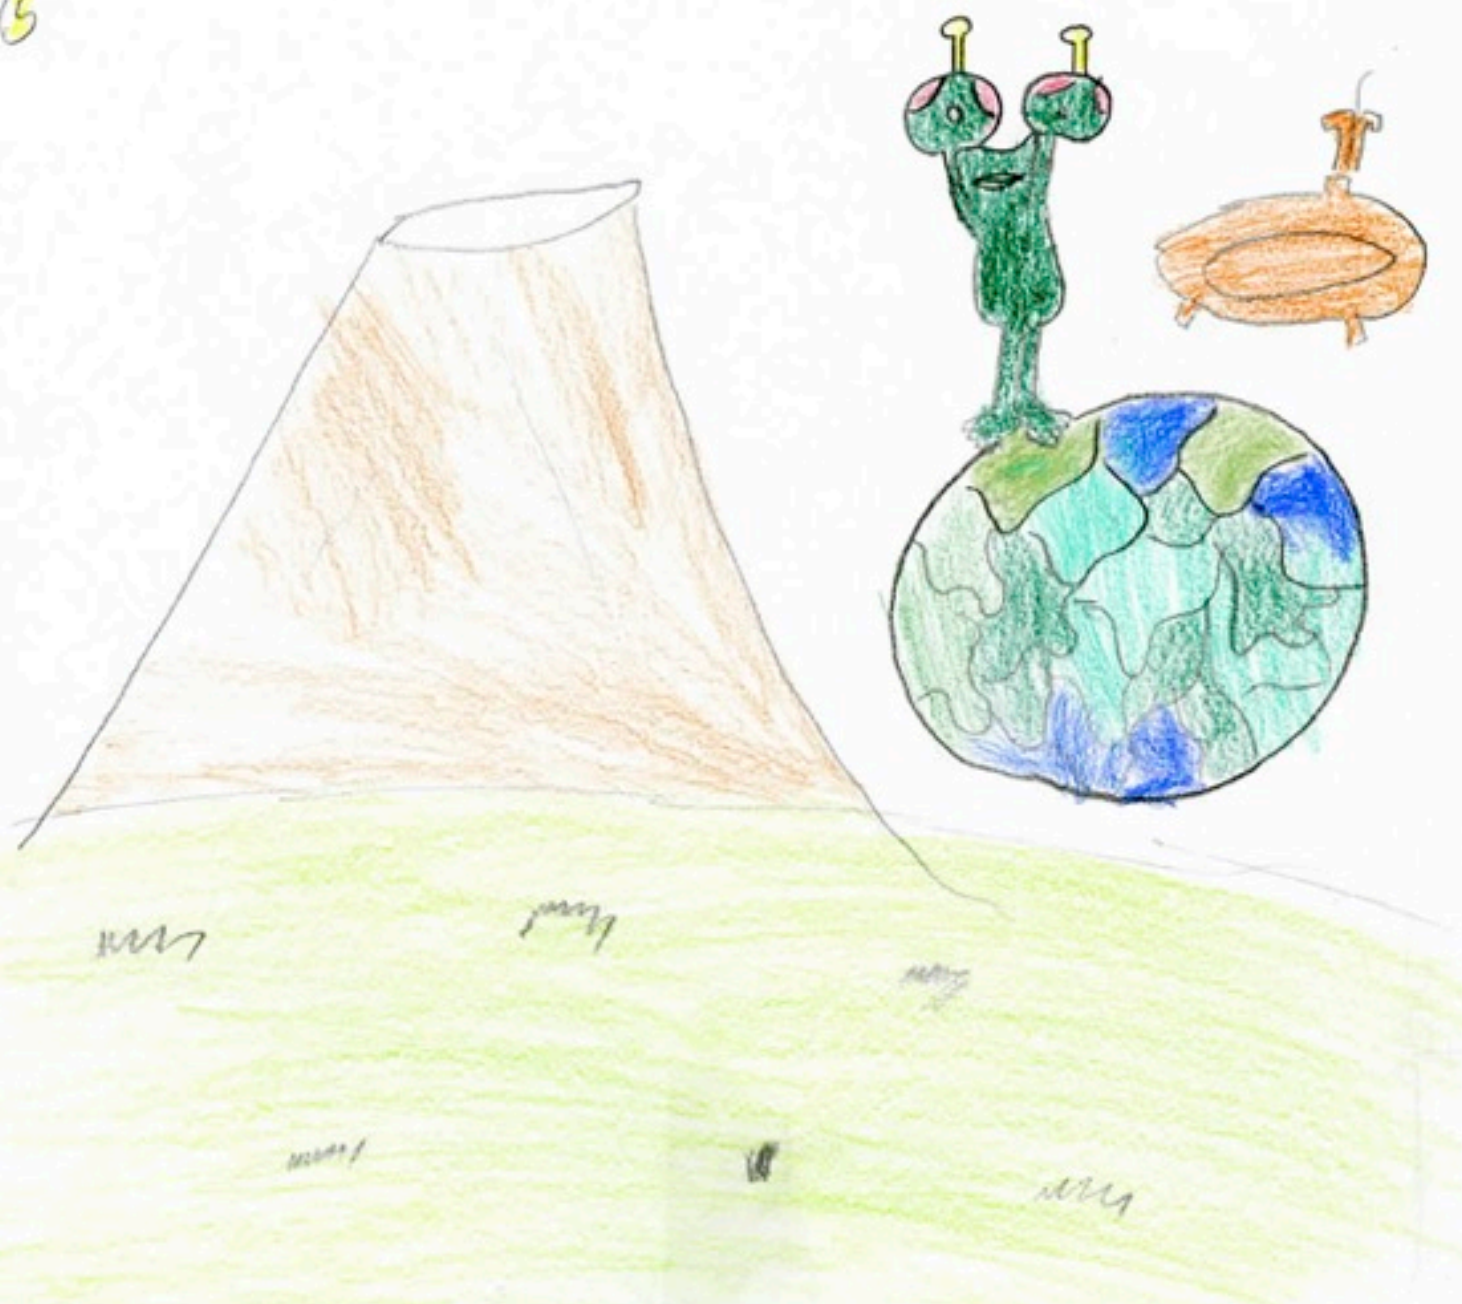

C'era una volta un alieno che viaggiava in tutte le zone del mondo.  
Un giorno si trovò vicino a un vulcano e non riuscì a capire  
che cosa era.

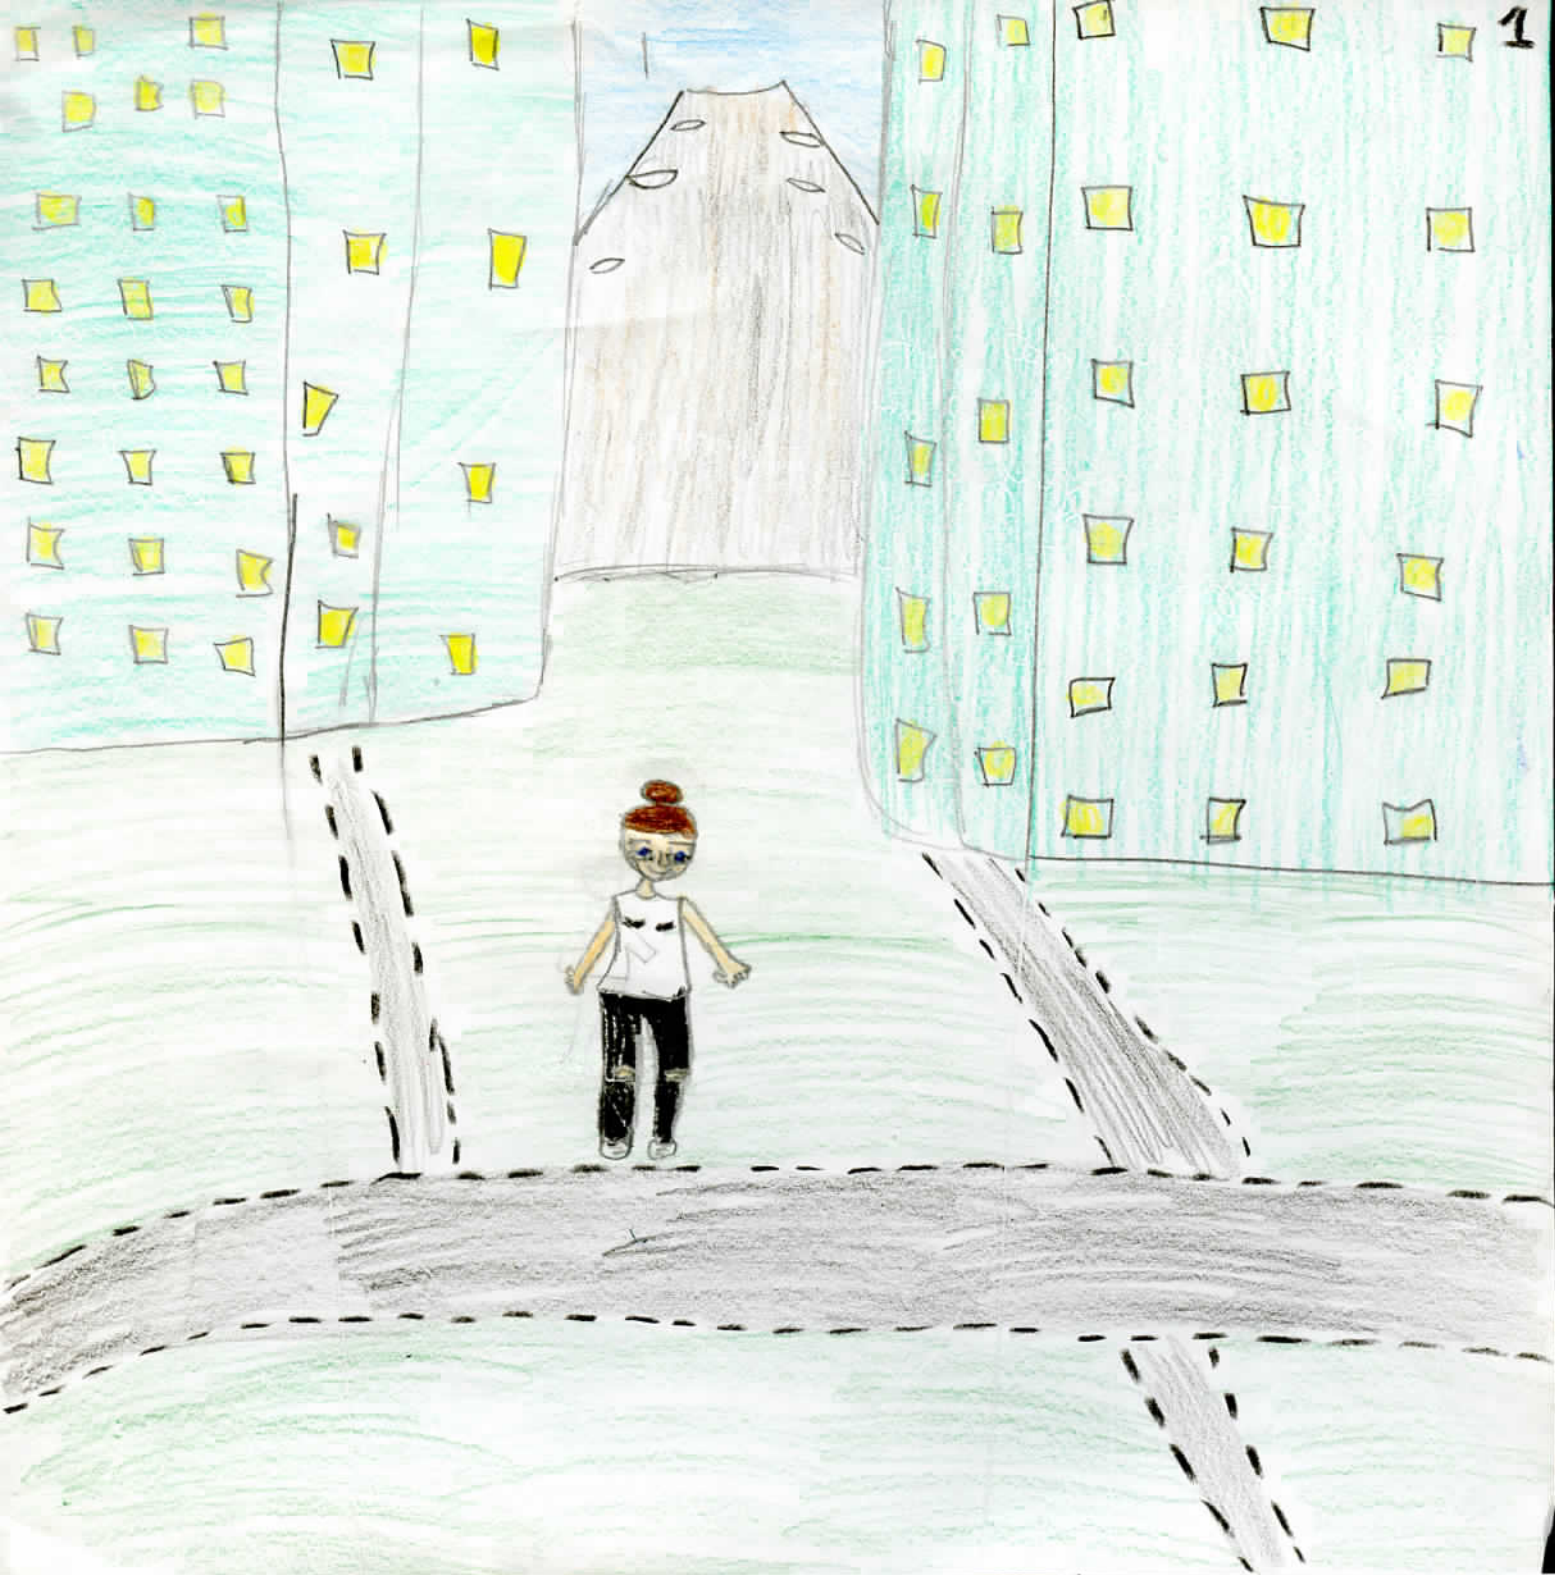

Questo ragazzo di nome Andrea, vive in Sicilia e sta assistendo ad una cosa inaspettata. Andrea precisamente si trovava in città a due passi dall'Etna.



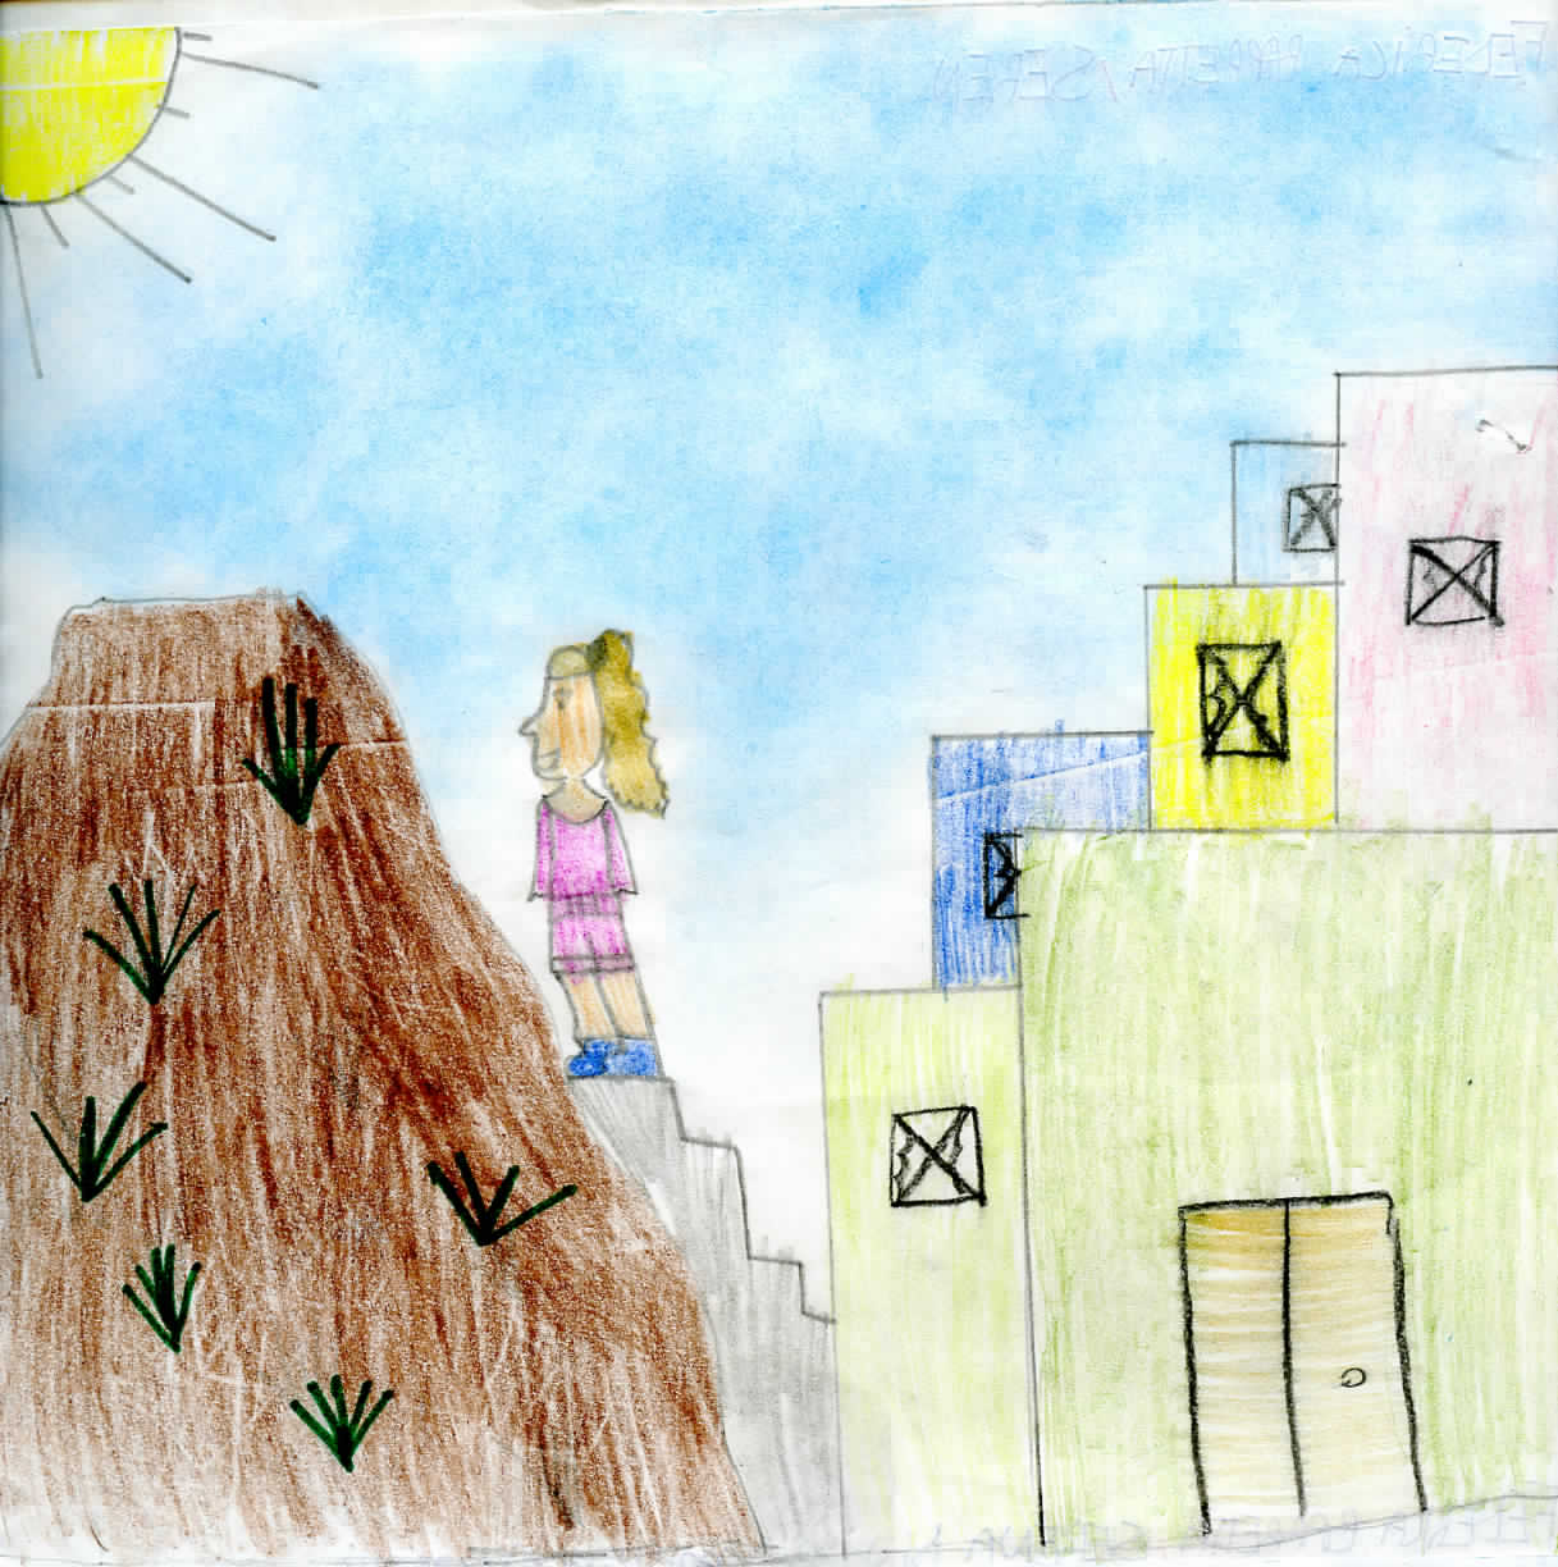

~~ALICE~~ ALICE VIVÉ A NAPOLI HA 13 ANNI. UN GIORNO ANDO' A VEDERE IL  
VESUVIO, UN VOLCANO <sup>A NAPOLI</sup> LA SUA BELLEZZA ERA INFINITA E ALICE DECISE DI  
SALIRE AD UN TRATTO ENTRO' DENTRO IL VESUVIO E NON C'ERA LA  
IL CIO' ERA STRANO E ALICE INIZIO' A PREOCCUPARSI.

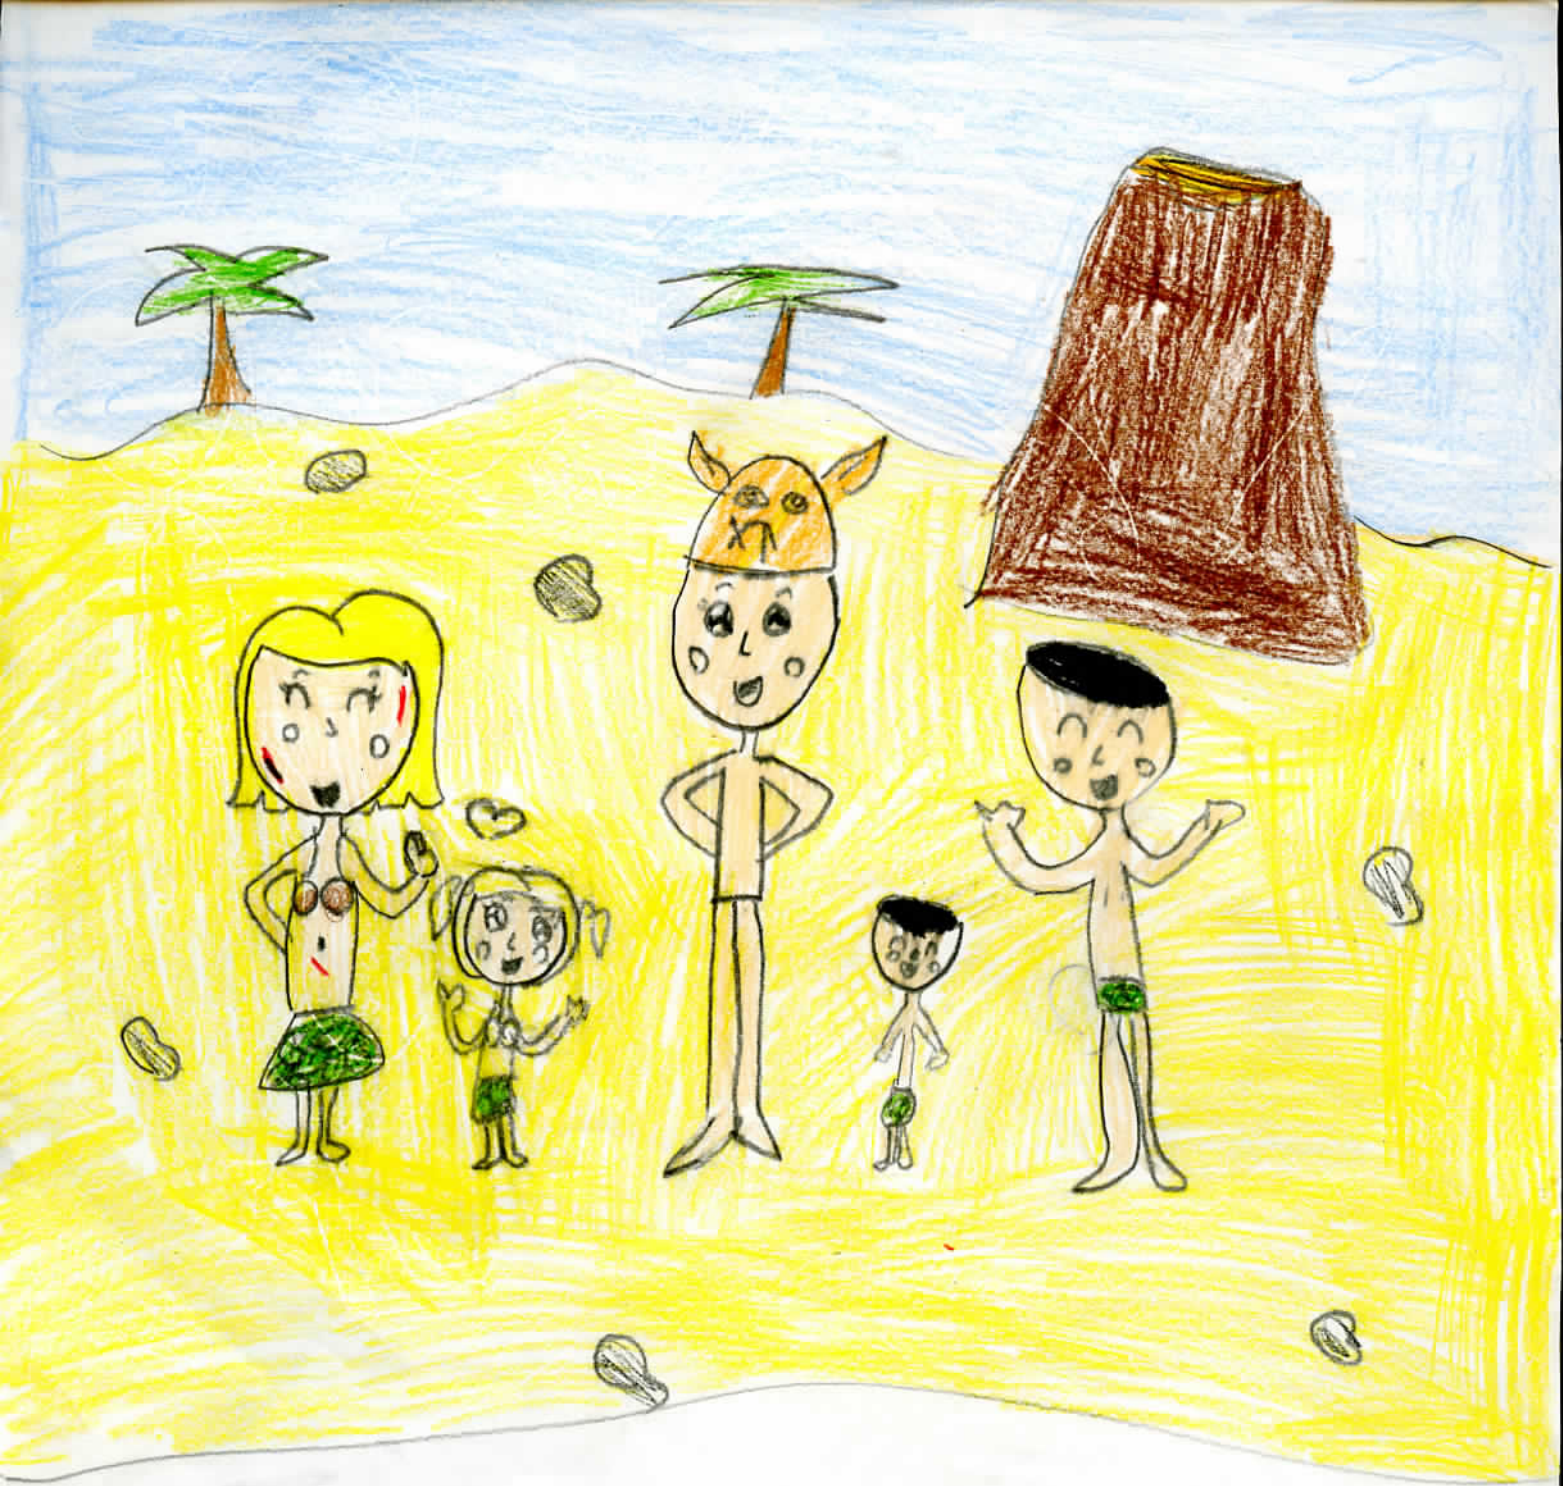

l'era una volta dei fratellino stavano  
dormendo e hanno sentito un rumore e si  
sono svegliati e hanno visto il fumo e ando  
a svegliare i loro genitore e dicono andiamo  
in un'altra parte dai suoi nonni

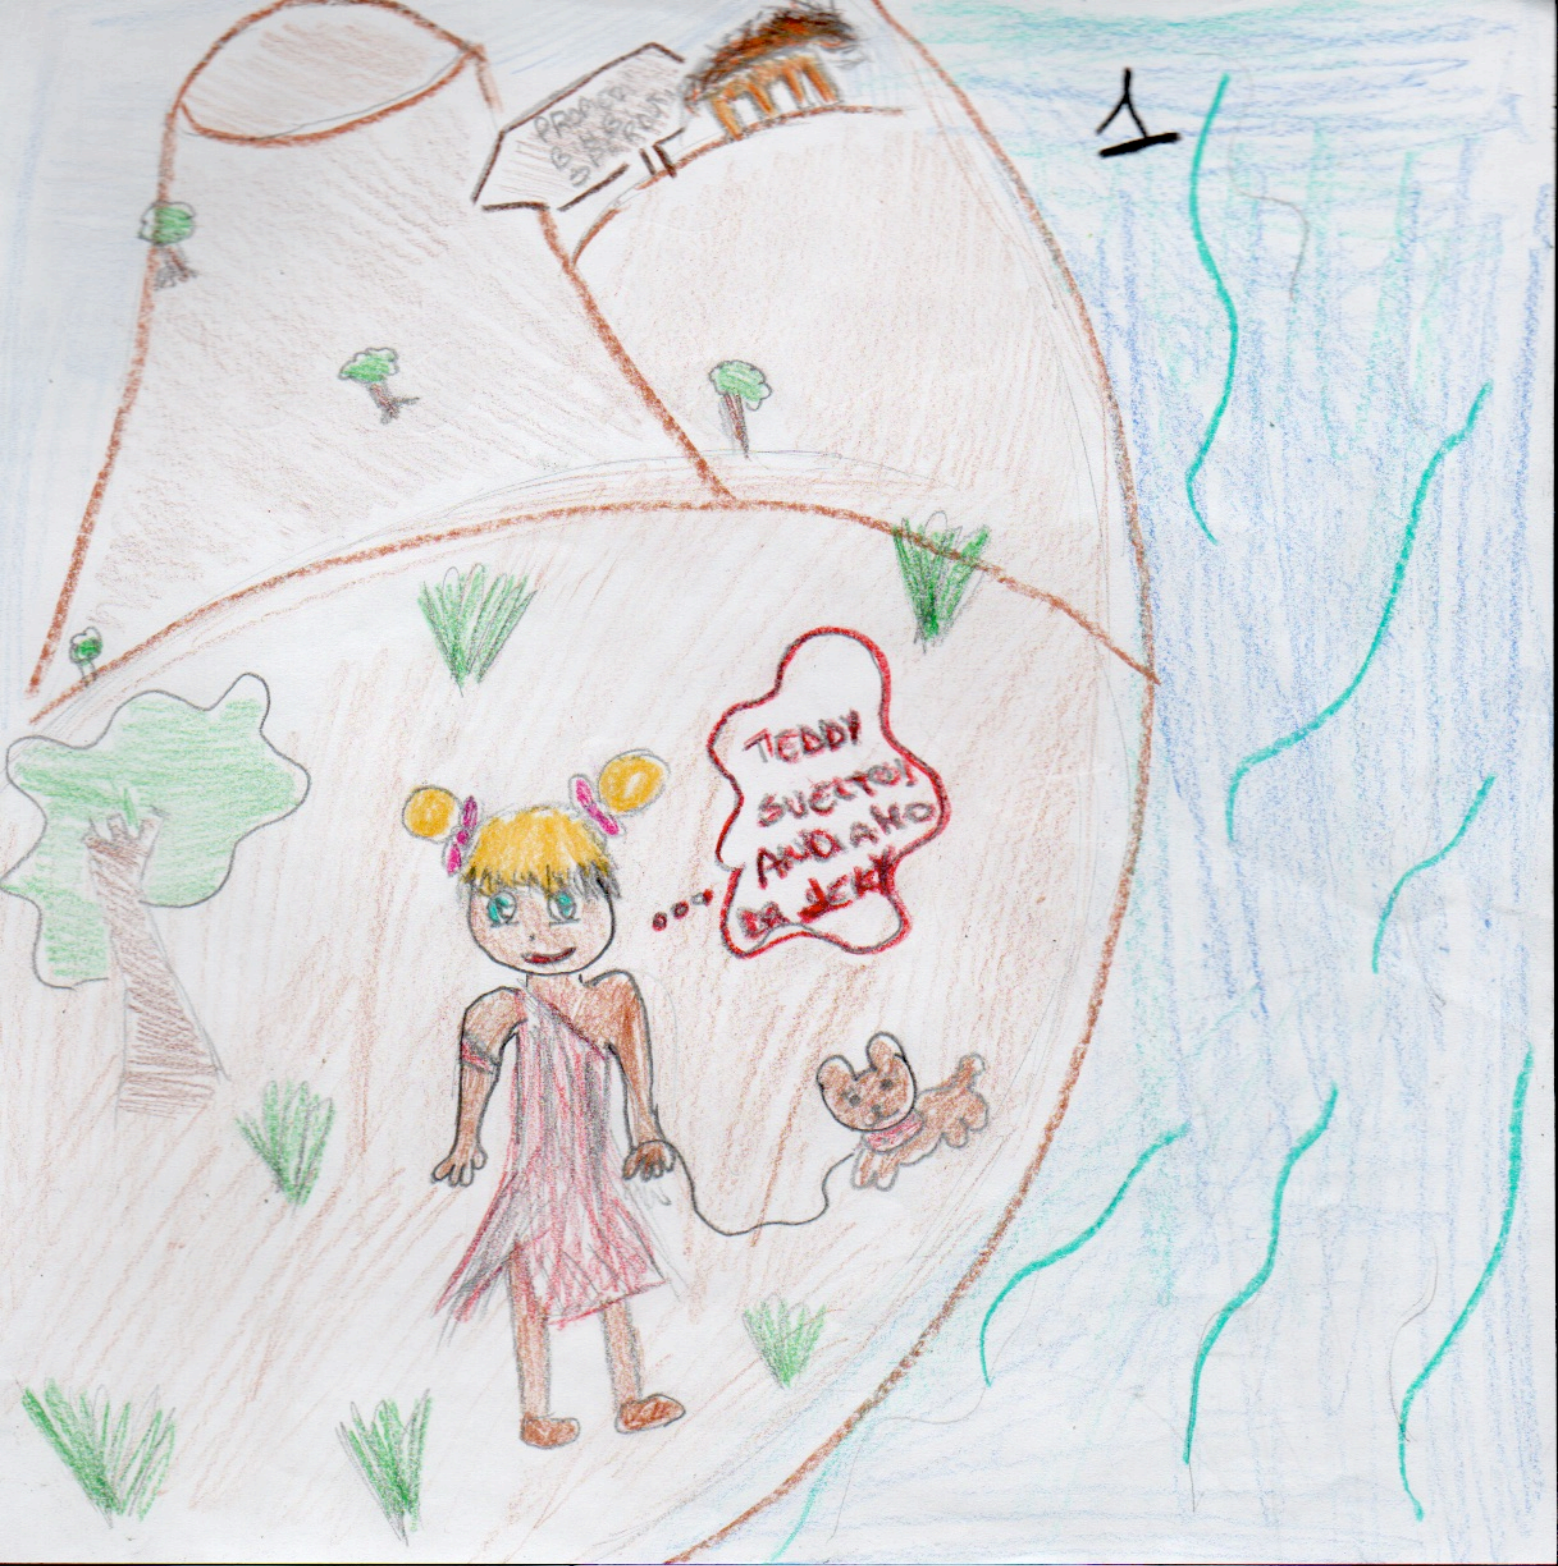

C'ERA UNA VOLTA SU ON' ISOLA DESERTA UNA BAMBINA DI  
NOME MOLLY CHE VIVEVA NEI PARAGGI DI UN VULCANO CON IL SUO  
CORSETTO DI NOME TEDDY. ALLOGGIAVA IN UNA CAPANNA INSIEME  
A DEI BAMBINI SPERDOTI.

1

1

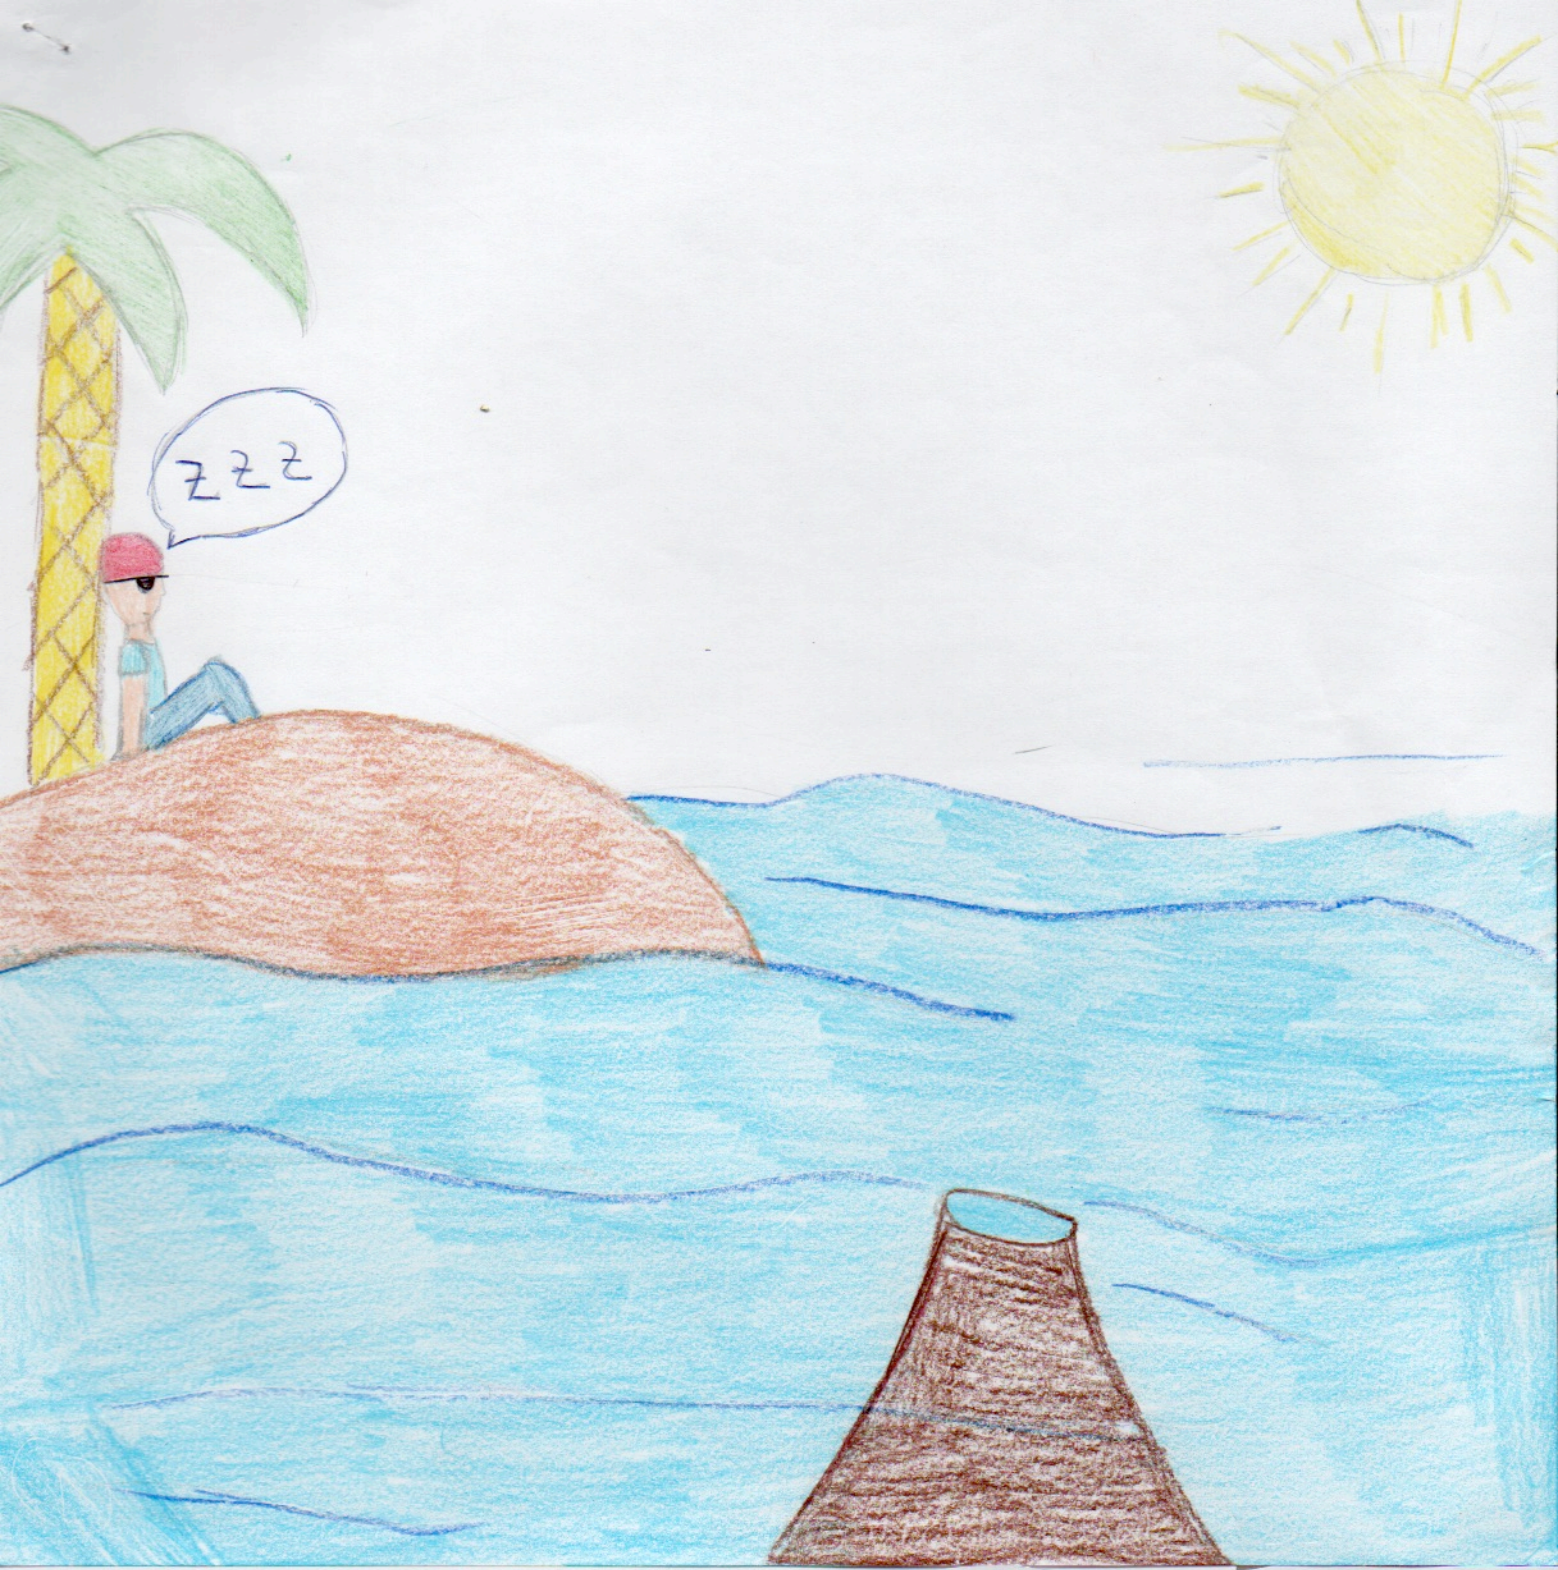

Jack il pirata vive su un' isola, un mezzo di more, accanto ad un  
vulcano.

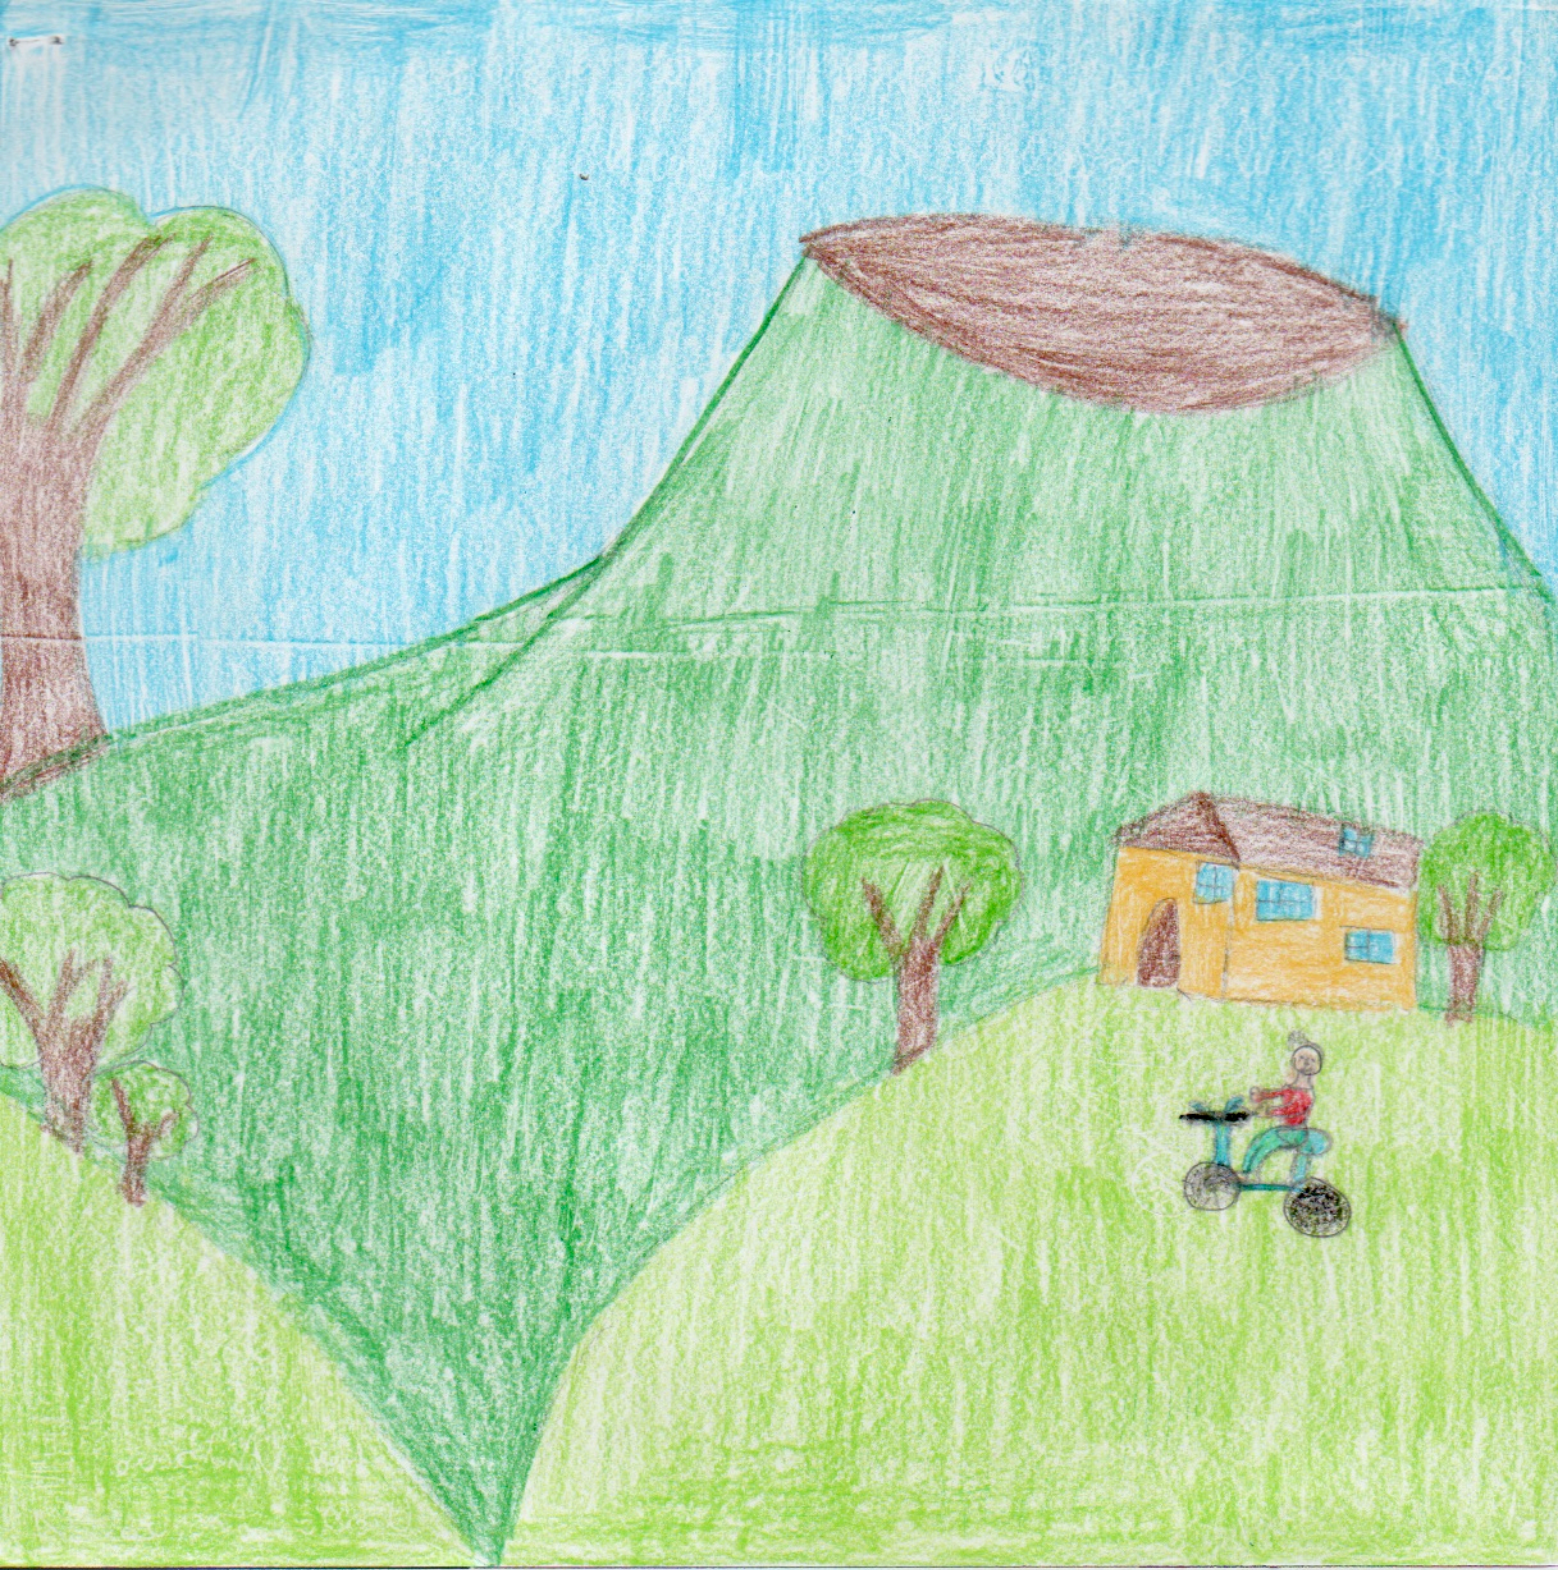

In questa immagine è rappresentata la casa di Alessandro che si trova su una collina, sotto un vulcano; lui è sulla bici

SCENA 1

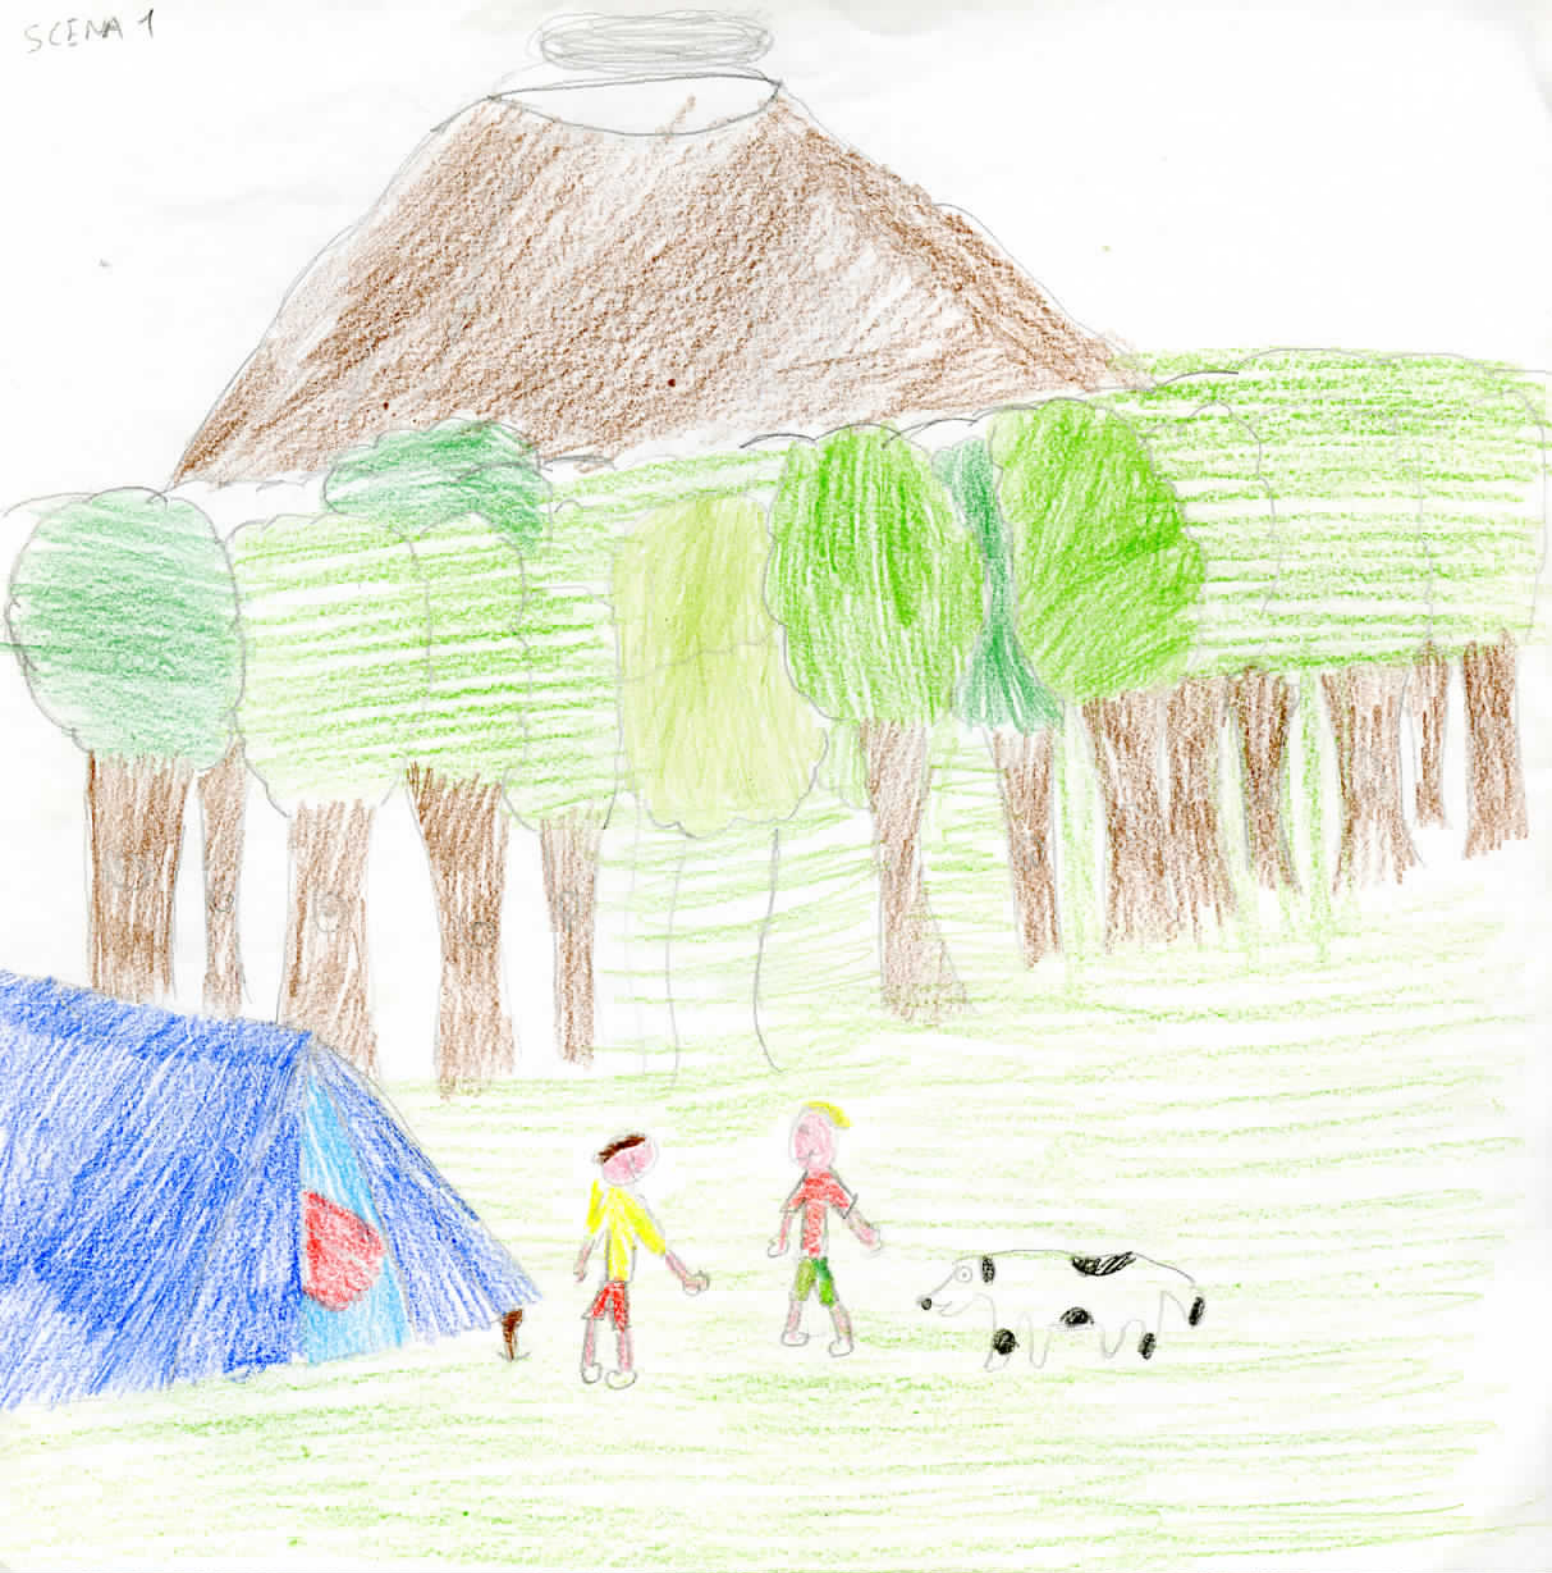

SCENA 1  
DUE AMICI SI TROVANO IN UNA FORESTA INSIEME AL LORO  
CANE ACCAMPATI IN UNA TENDA, TRA GLI ALBERI RIESCONO A SCOPRIRE  
UN VULCANO GRANDISSIMO ~~TRA GLI ALBERI~~

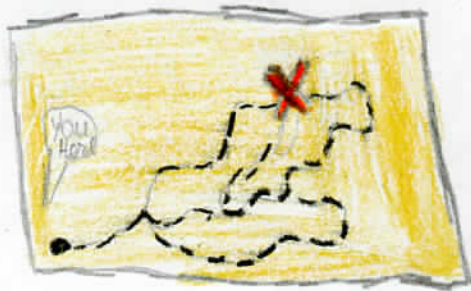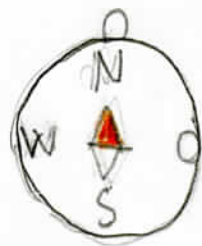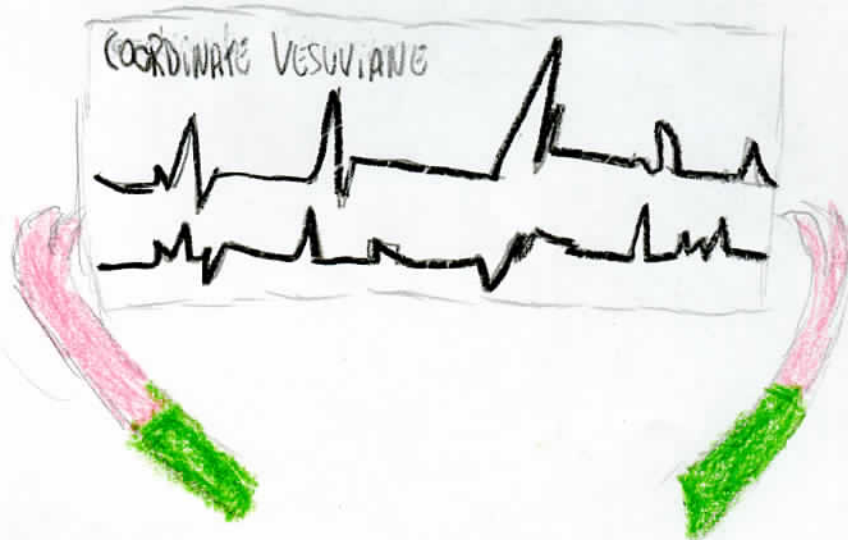

Brian va ad Eucolono per visitare il Vesuvio per farci una  
ricerca sulla sua esplosione <sup>con le sue</sup> coordinate dello scisma del terremoto

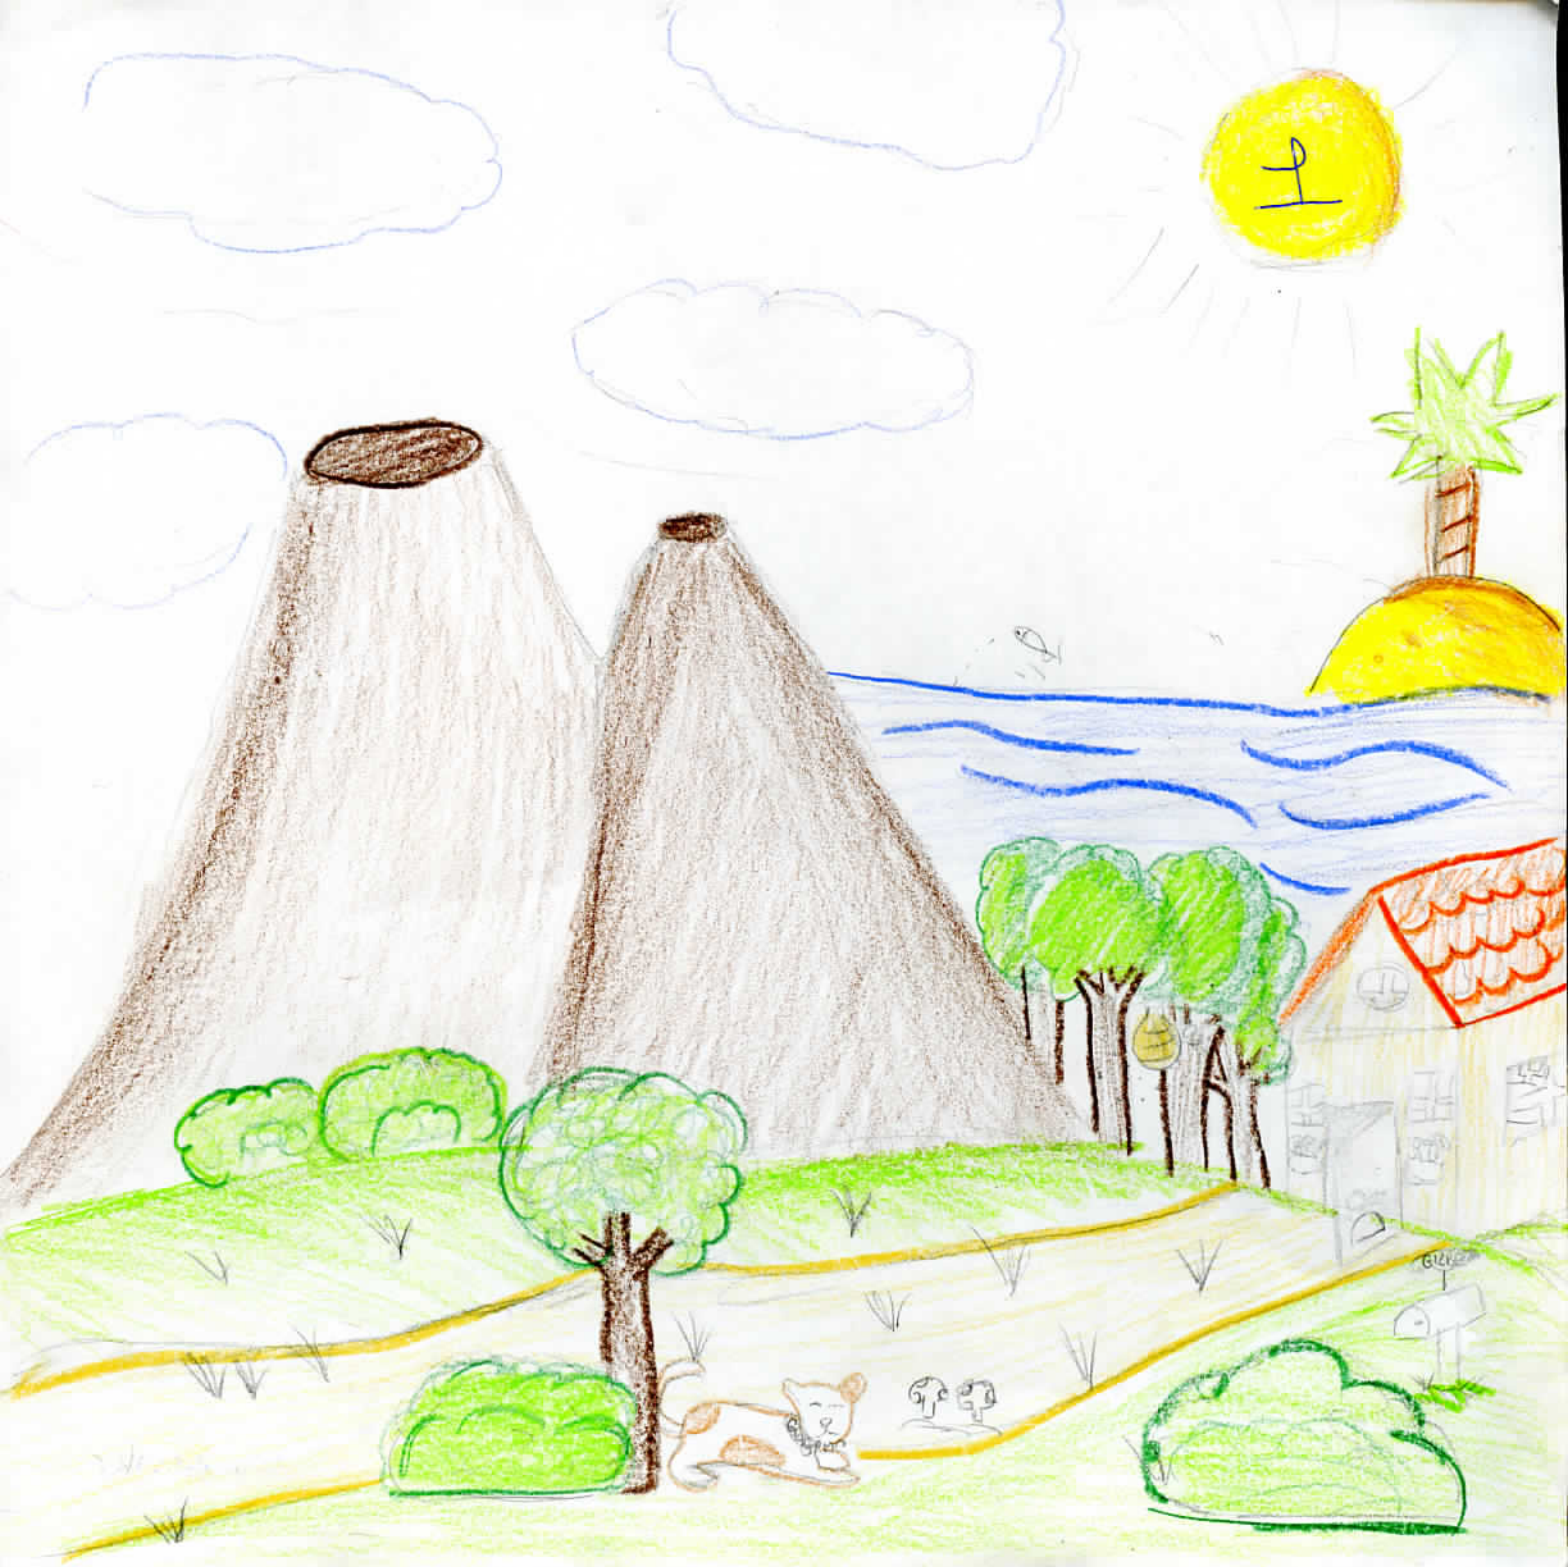

C'era una volta un ragazzo di nome ±  
Gilberto che viveva tutto solo con il suo cane  
Giacomo in una piccola casetta vicino al Vesuvio e  
al mare ...



1

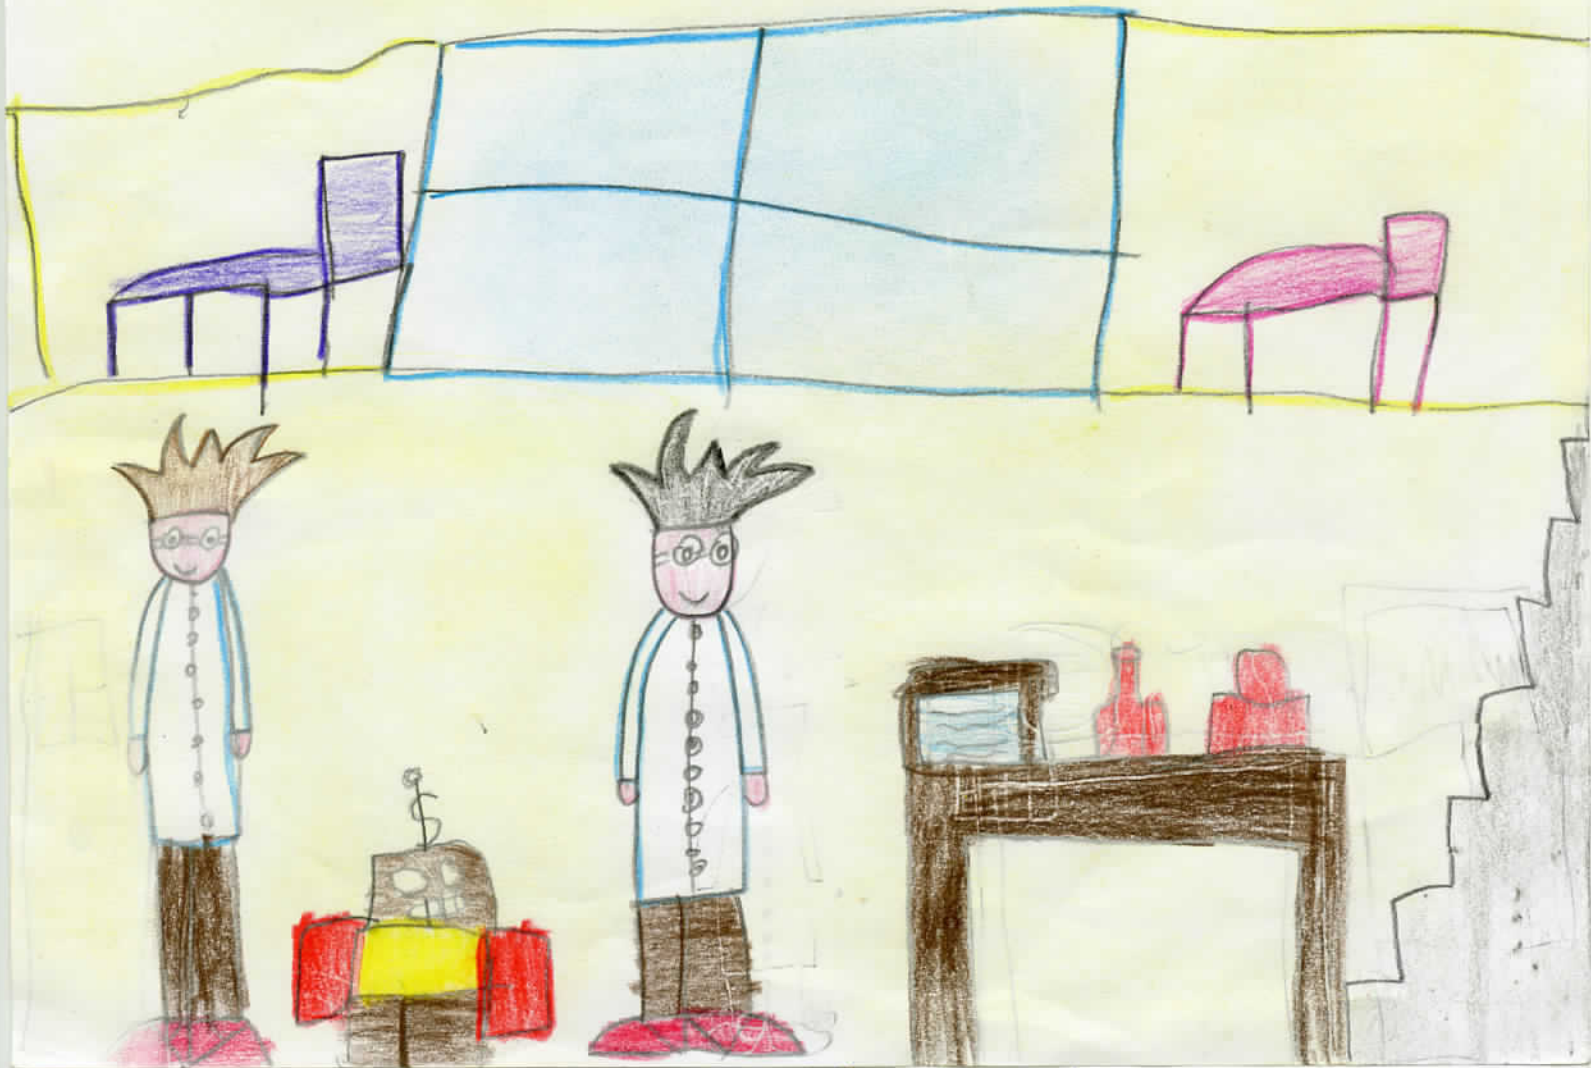

Un giorno lo scienziato Alberto decise di vivere in montagna perché voleva studiare i vulcani tra i quali l'Etnea, e questo grande vulcano chiamato Etnea voleva studiarlo insieme ad altri scienziati.

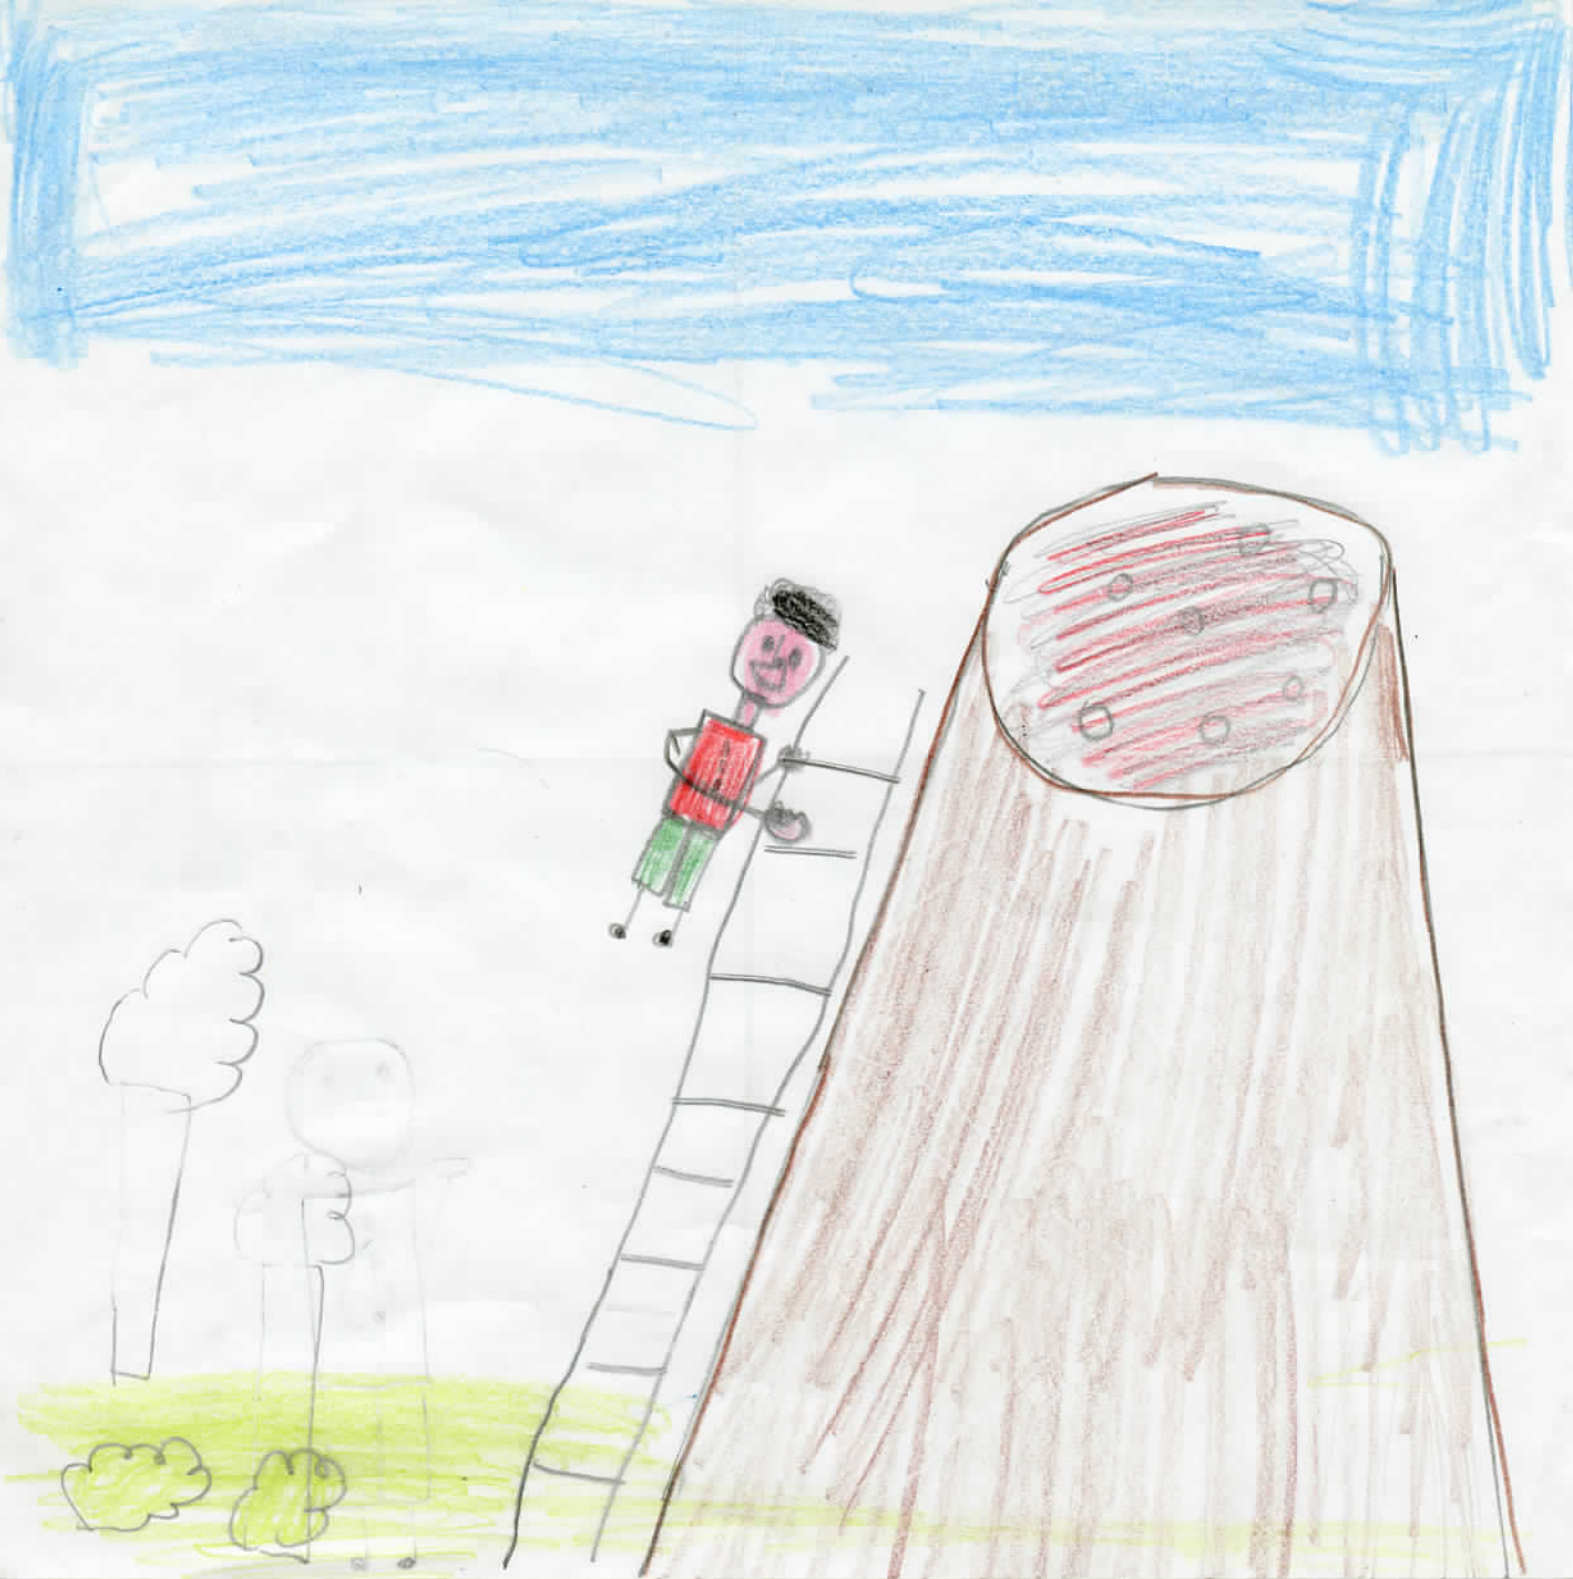

Lo scienziato fa ~~essa~~ degli esperimenti al vesuvio  
poi lo scienziato era andato al vesuvio di Etna  
andò sopra al vesuvio. noi

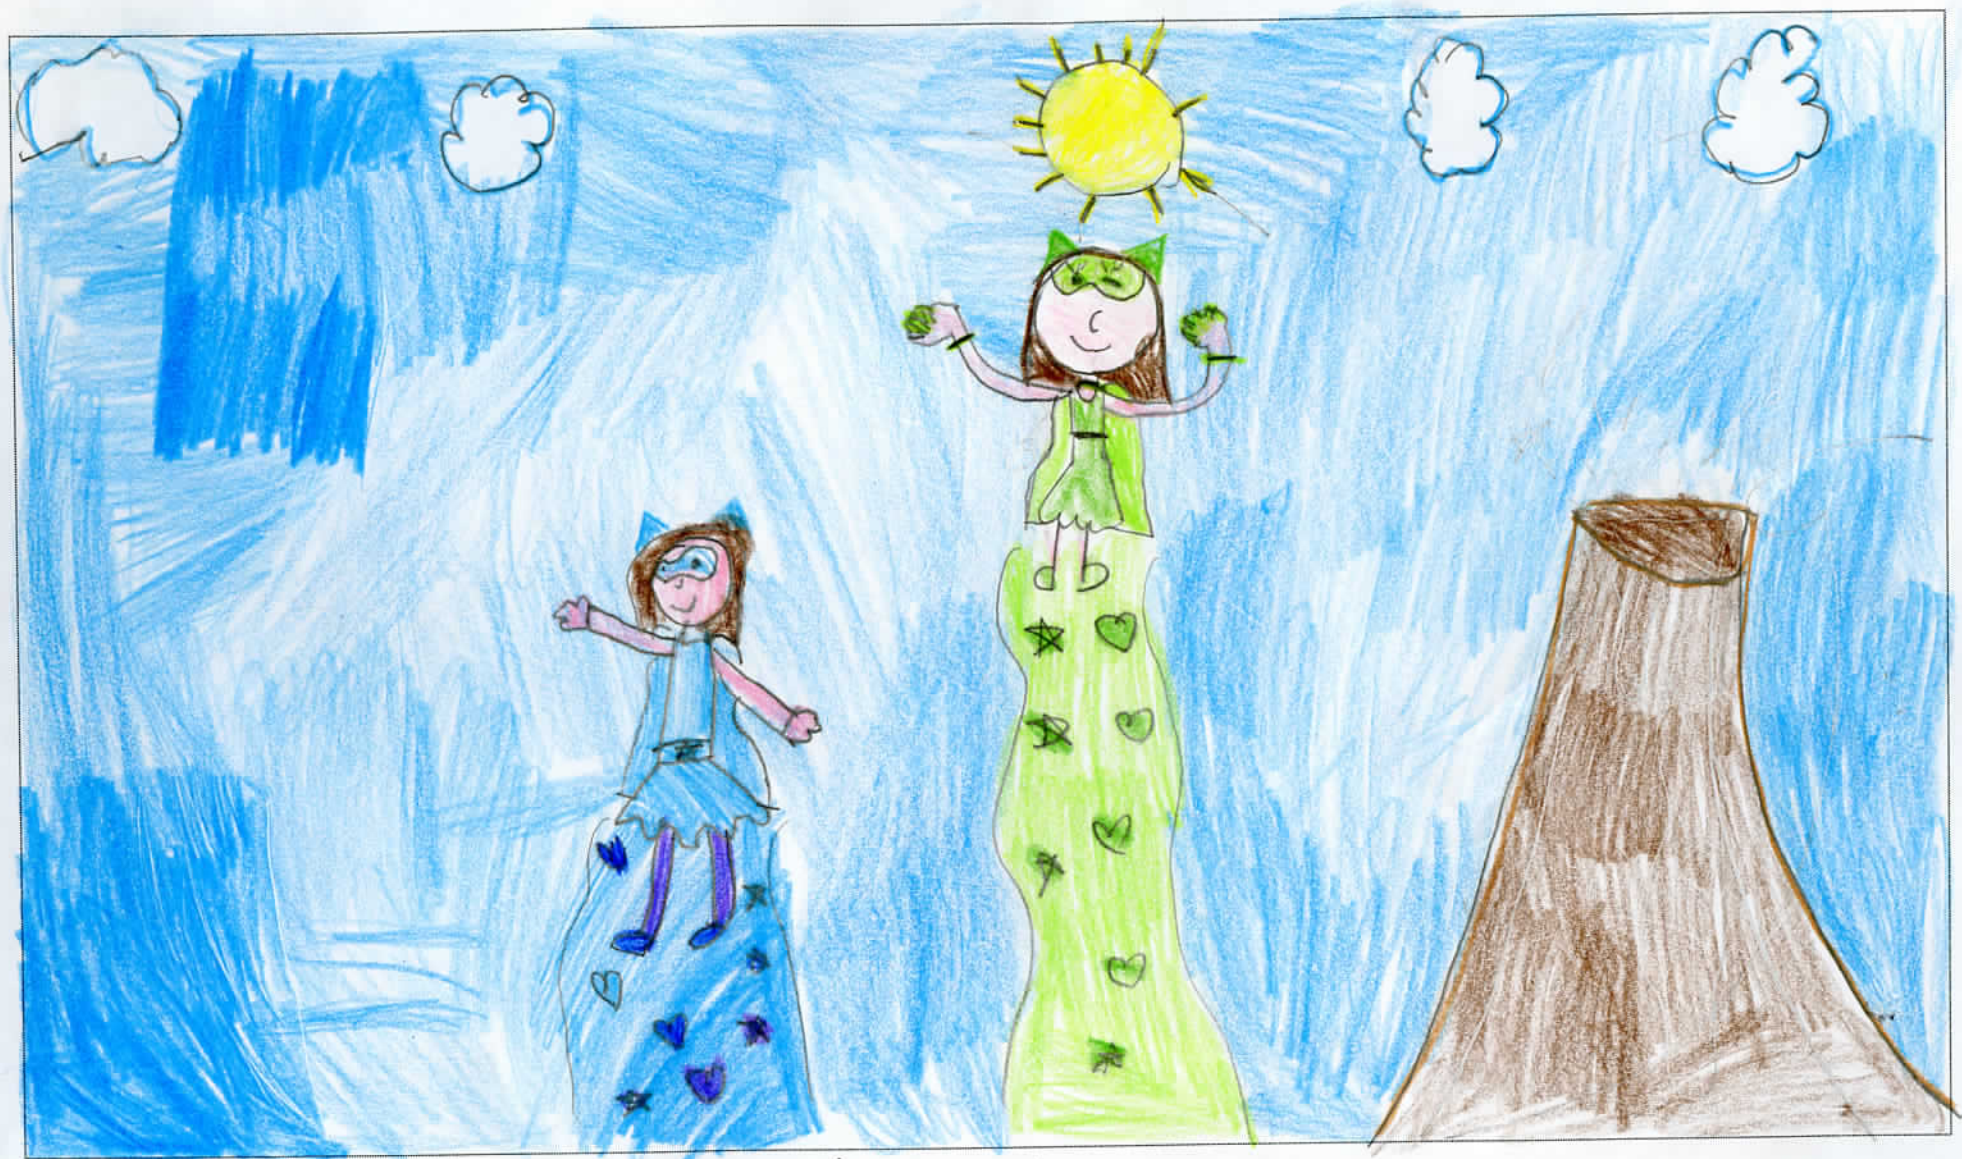

SCENA 1: La quiete - Le super cat volano felici,

N° 6



C'era una volta un uomo di nome Eugenio, esso  
abitava in un vulcano.

## **Supplement 3 - Frame 2 – Volcanic unrest**

Selected examples of the stories' second frame, describing the phase of unrest.

Drawings were realized by the pupils of primary and secondary schools listed in Table 1. The schools' enrolment into the project was discussed by schools' board and then presented to the families at the beginning of the school year, as a part of the school curriculum (Piano Triennale di Offerta Formativa). We did not collect any personal information about the participating students who always worked in pairs or small groups. Students were explicitly asked not to print their full names on their compositions. The production of text and drawings was not compulsory and students were free to decide the degree of their involvement in the exercise. The stories we collected were freely donated to be used for research purposes such as the present manuscript. Originals are kept into the Edurisk archives.

The supplement is provided as a portfolio, with examples of the collected materials.

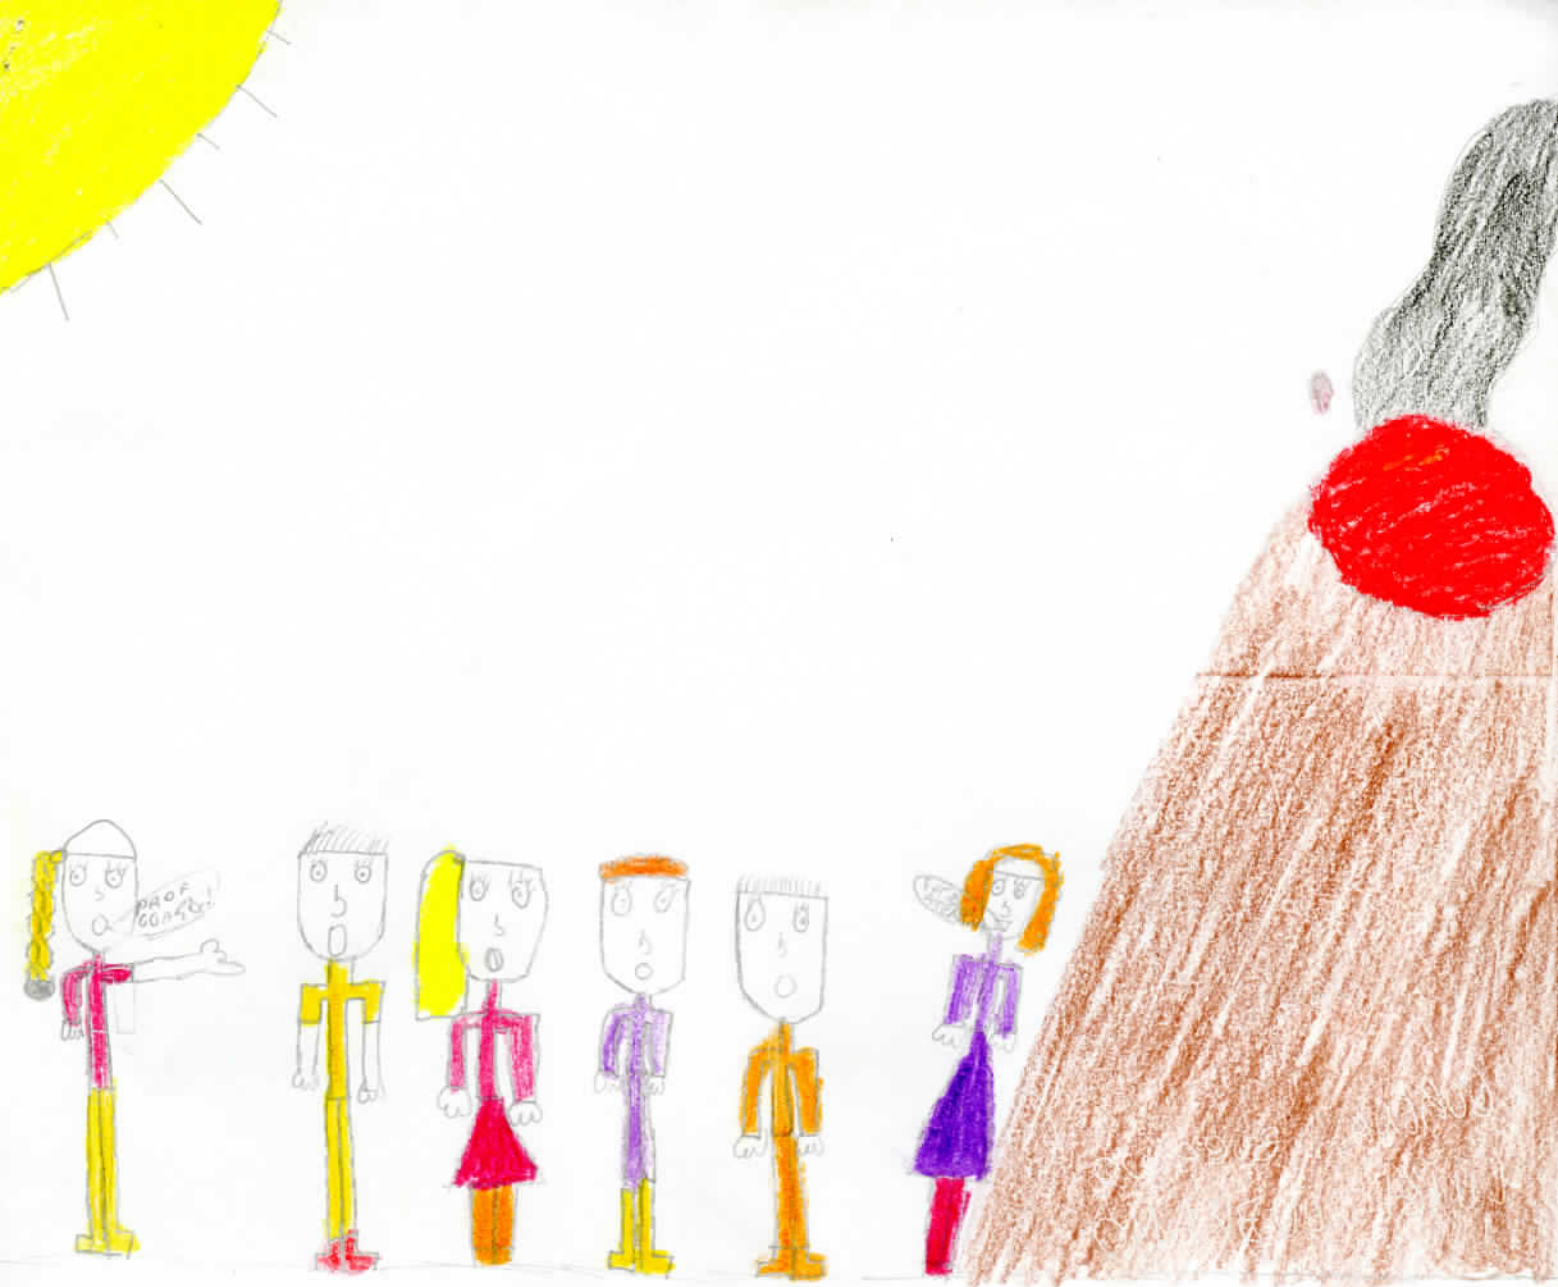

N.2  
10 RAGAZZI SI ACCORSERO DI UNA COSA CHE IL VULCANO INIZIA  
UN PO AD ERUTTARE CIOE CHE ESCE UN PO DI FUMO E VANNO SUBITO A  
CHIAMARE LA PROF.

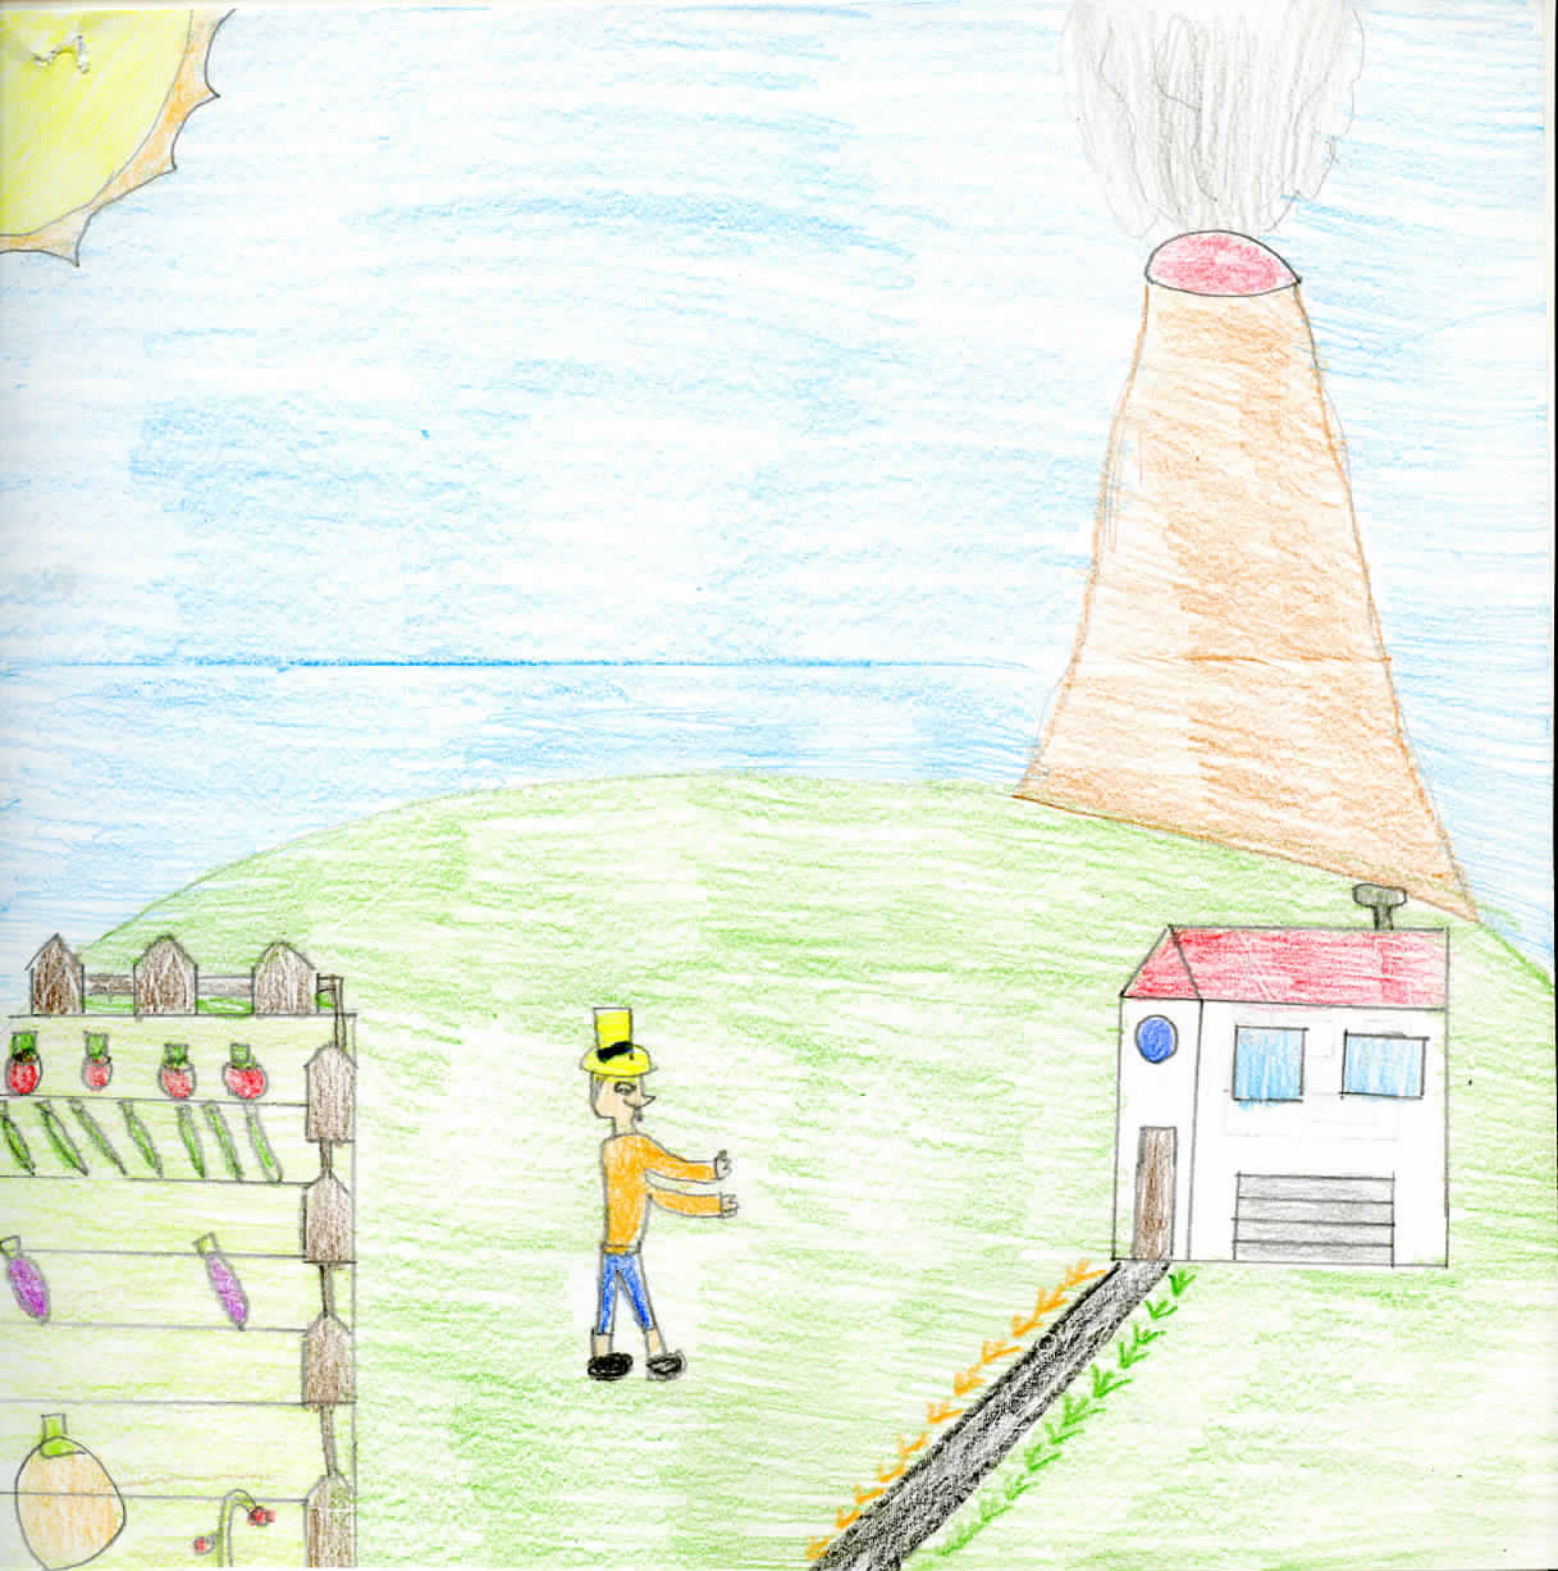

... MENTRE GIUSEPPE COLTIVAVA IL VULCANO INIZIAVA A  
DARE SEGNI PREOCCUPANTI: MANDAVA UN FUMO  
GRIGIO. GIUSEPPE DECISE DI DIRLO ALLA MOGLIE.  
USCIRONO PER VEDERE IL VULCANO E  
DECISERO DI PREPARARE LE VALIGIE E  
PARTIRE.

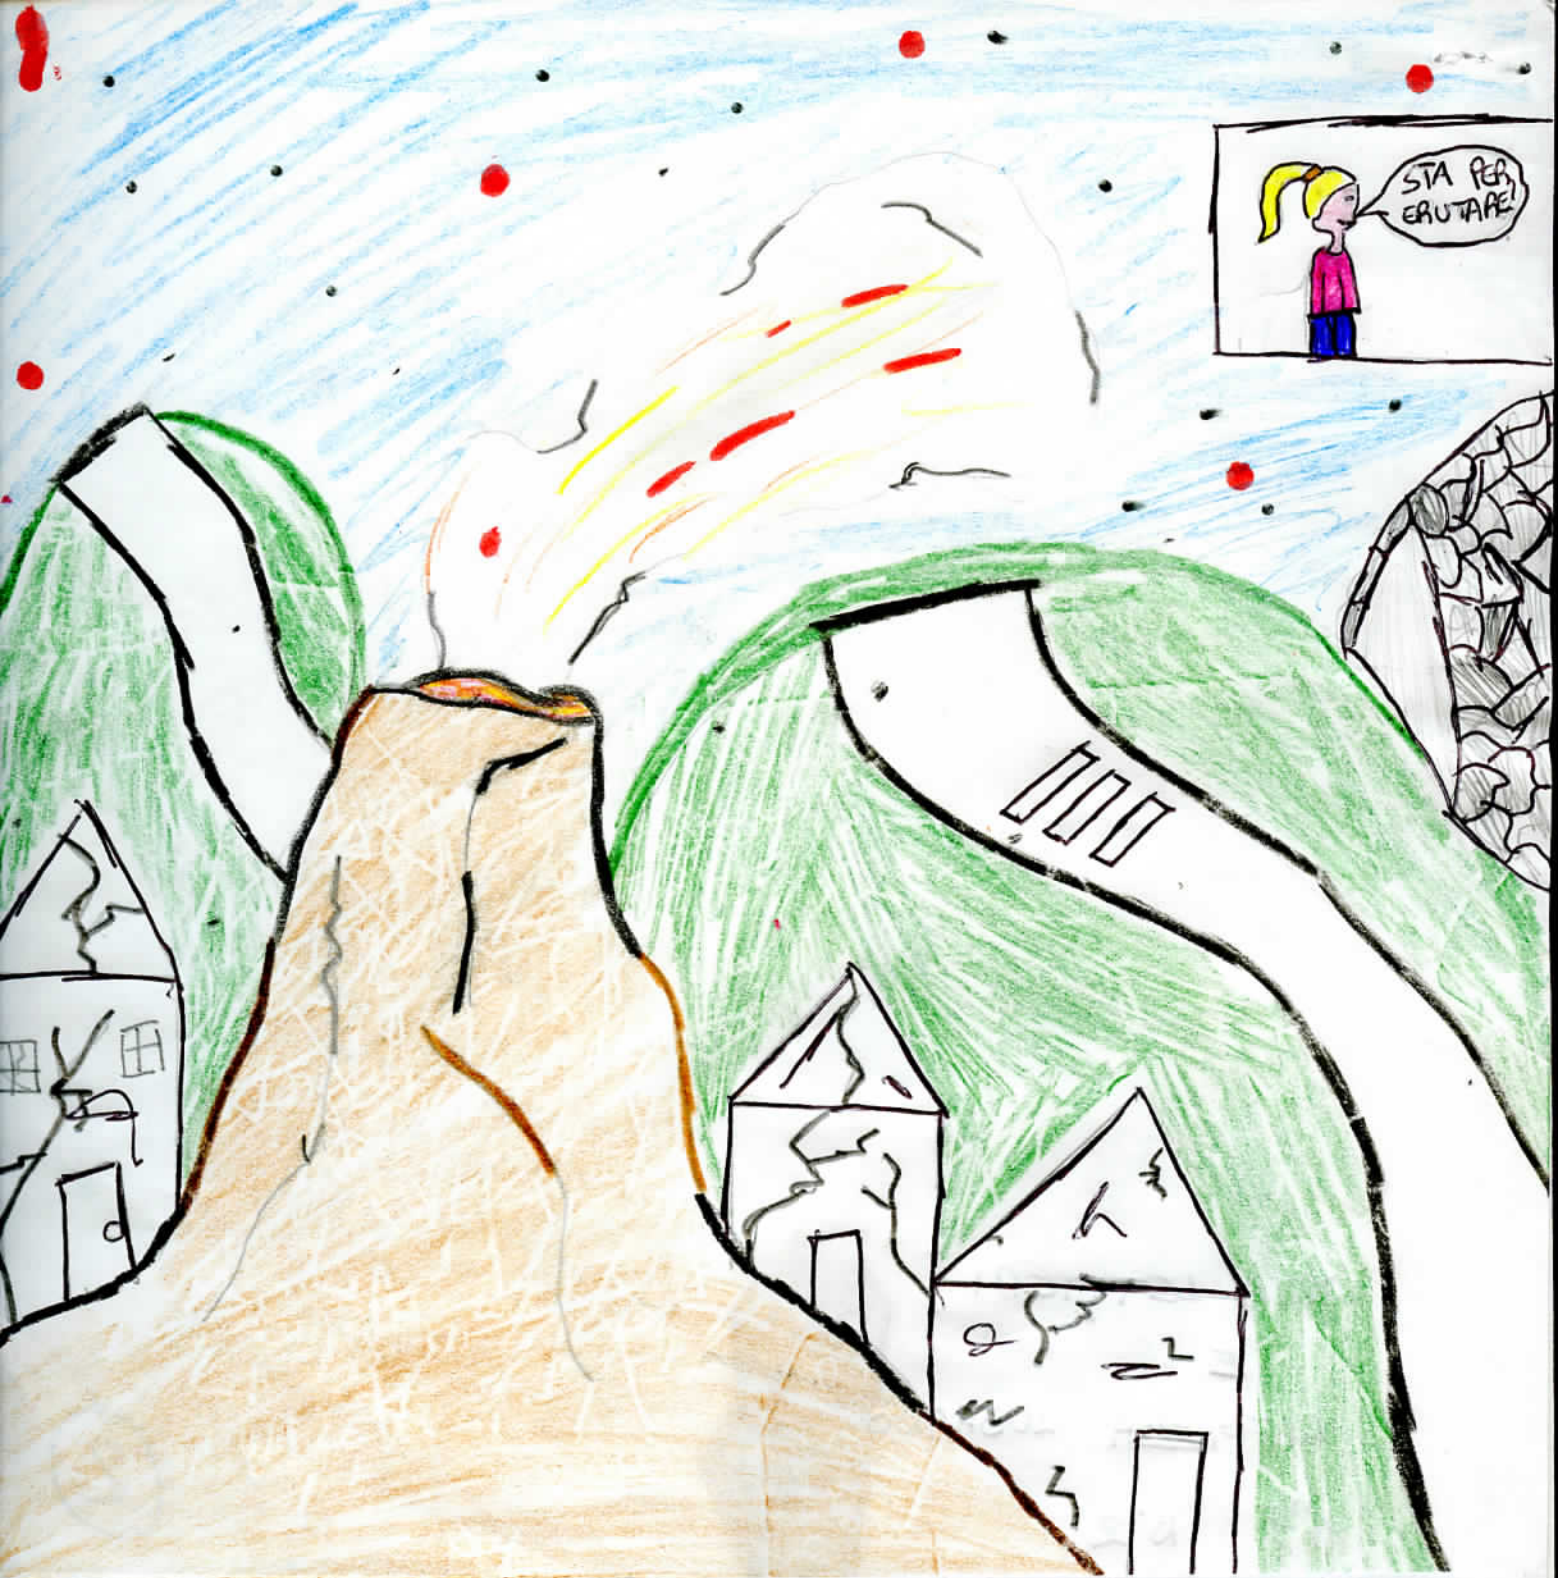

IL VESUVIO INIZIA A DARE SCOSSE DI TERREMOTO. ILY MOLTO PREOCCUPATA VA DA I SUOI NONNI CHE CONOSCONO MOLTO BENE IL VESUVIO. ILY SI CHIEDE: FORSE STA PER ERUTARE? DAI NONNI NON VIENE DATA RISPOSTA.

IL CANE CHARCHIE INIZIA AD ABBAIARE PER LA PAURA, COSÌ ILY PER TRANQUILLIZARLO GLI FA UN PÒ DI COCCOLE CON TIMORE CHE UNO E L'ALTRO NON POSSANO PIÙ RIVEDERSI.



Schema n° 2

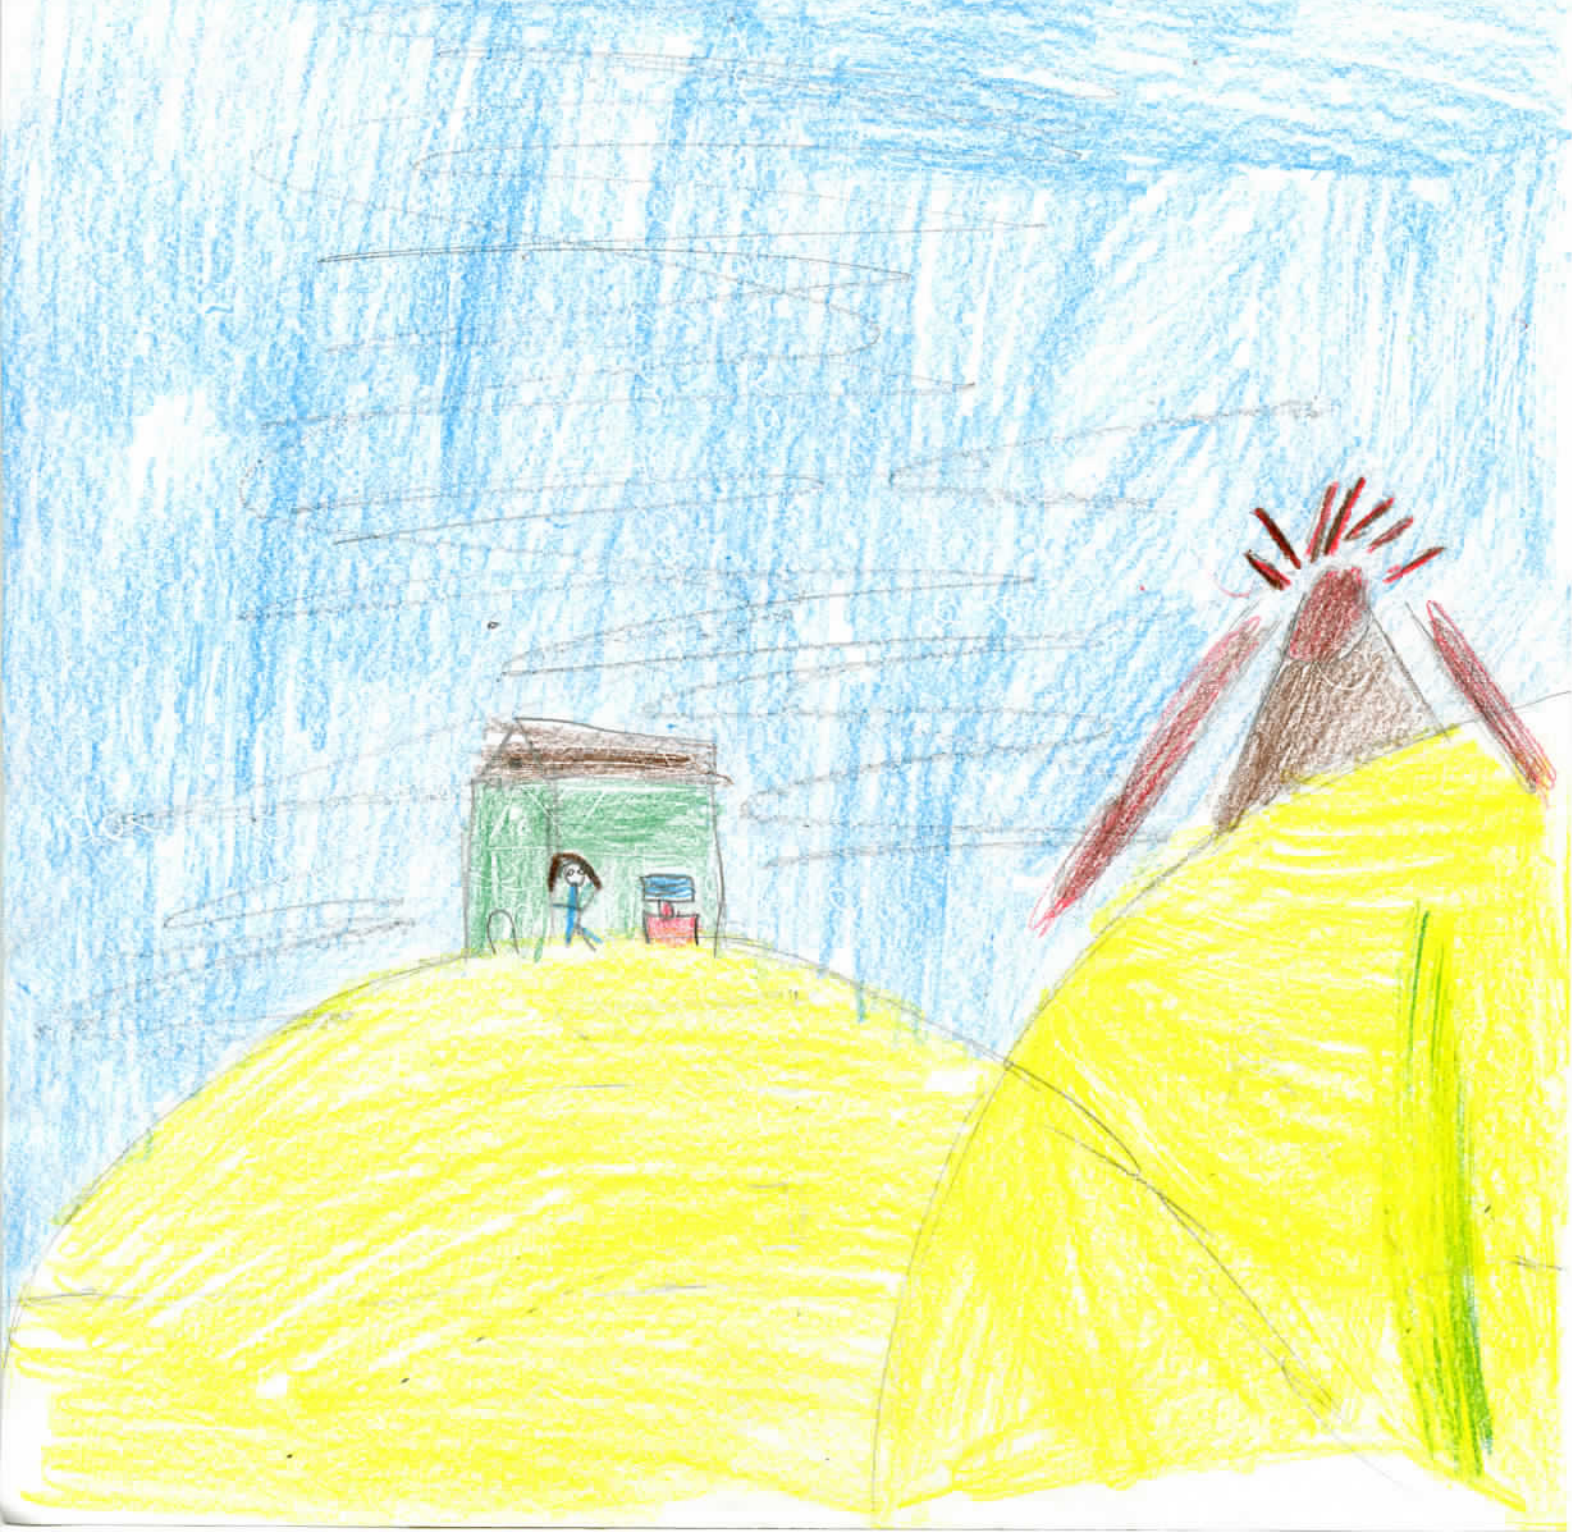

Schema N2

Un giorno Luca senti dei rumori strani, che non aveva mai sentito visto che il posto dove abitava era desolato. Lui accese la tv e vide e si accorse che dove abitava c'era un vulcano, ma soprattutto che quel vulcano era esploso e che lui doveva scappare.

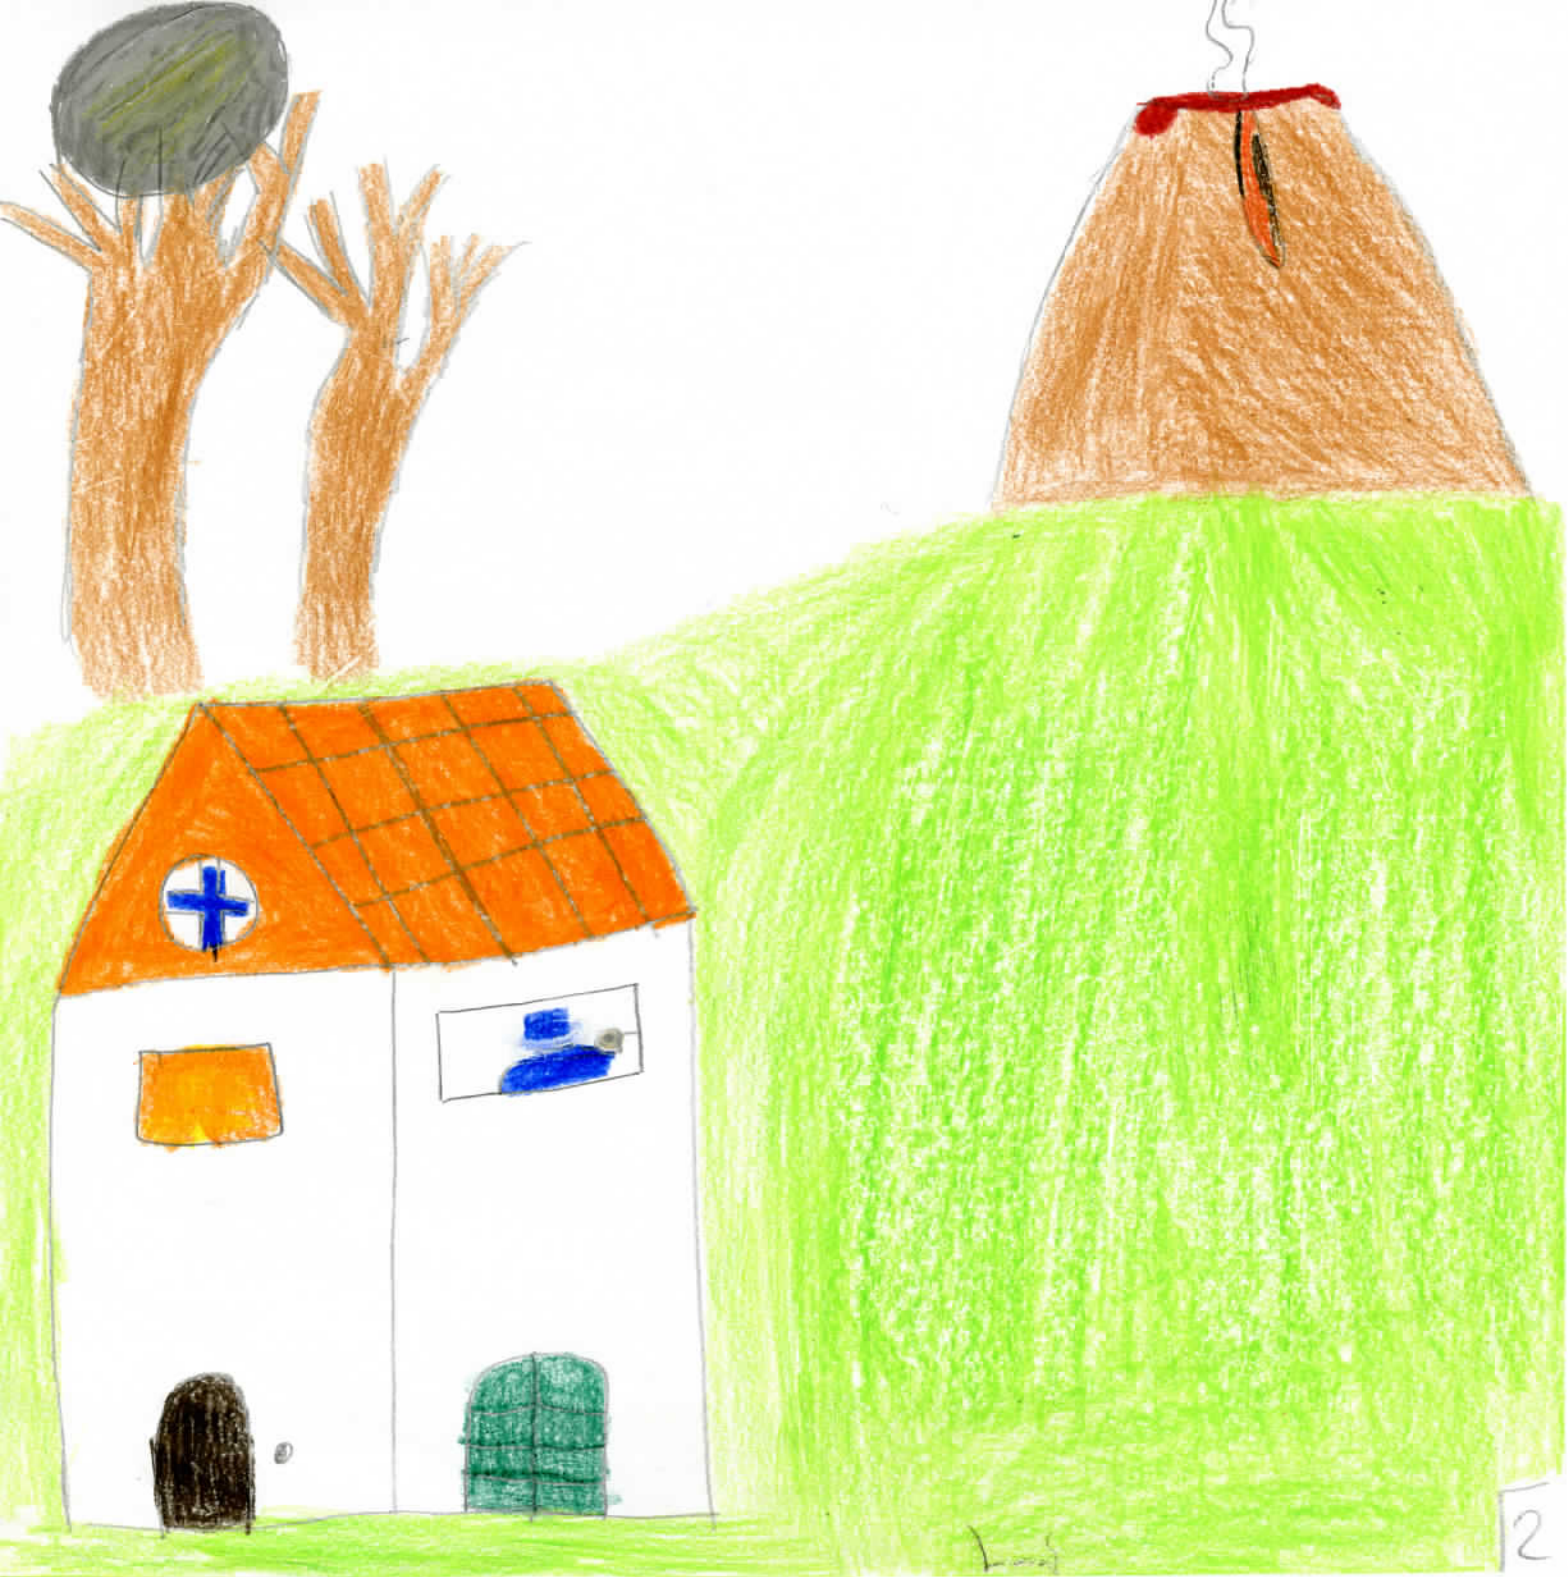

Loekie andò a dormire e il vulcano iniziò a combiarse, ~~si vedeva~~ emettere fumo e cacciare  
piccole pezzi di lava. Il giorno dopo ~~si~~ Loekie si Meglio e guardò quello che stava accadendo.  
Il borciado era preoccupato e non lo dinò ~~ca~~ e nemmeno per non far mettere paura agli  
abitanti della sua città. Fino a quando...

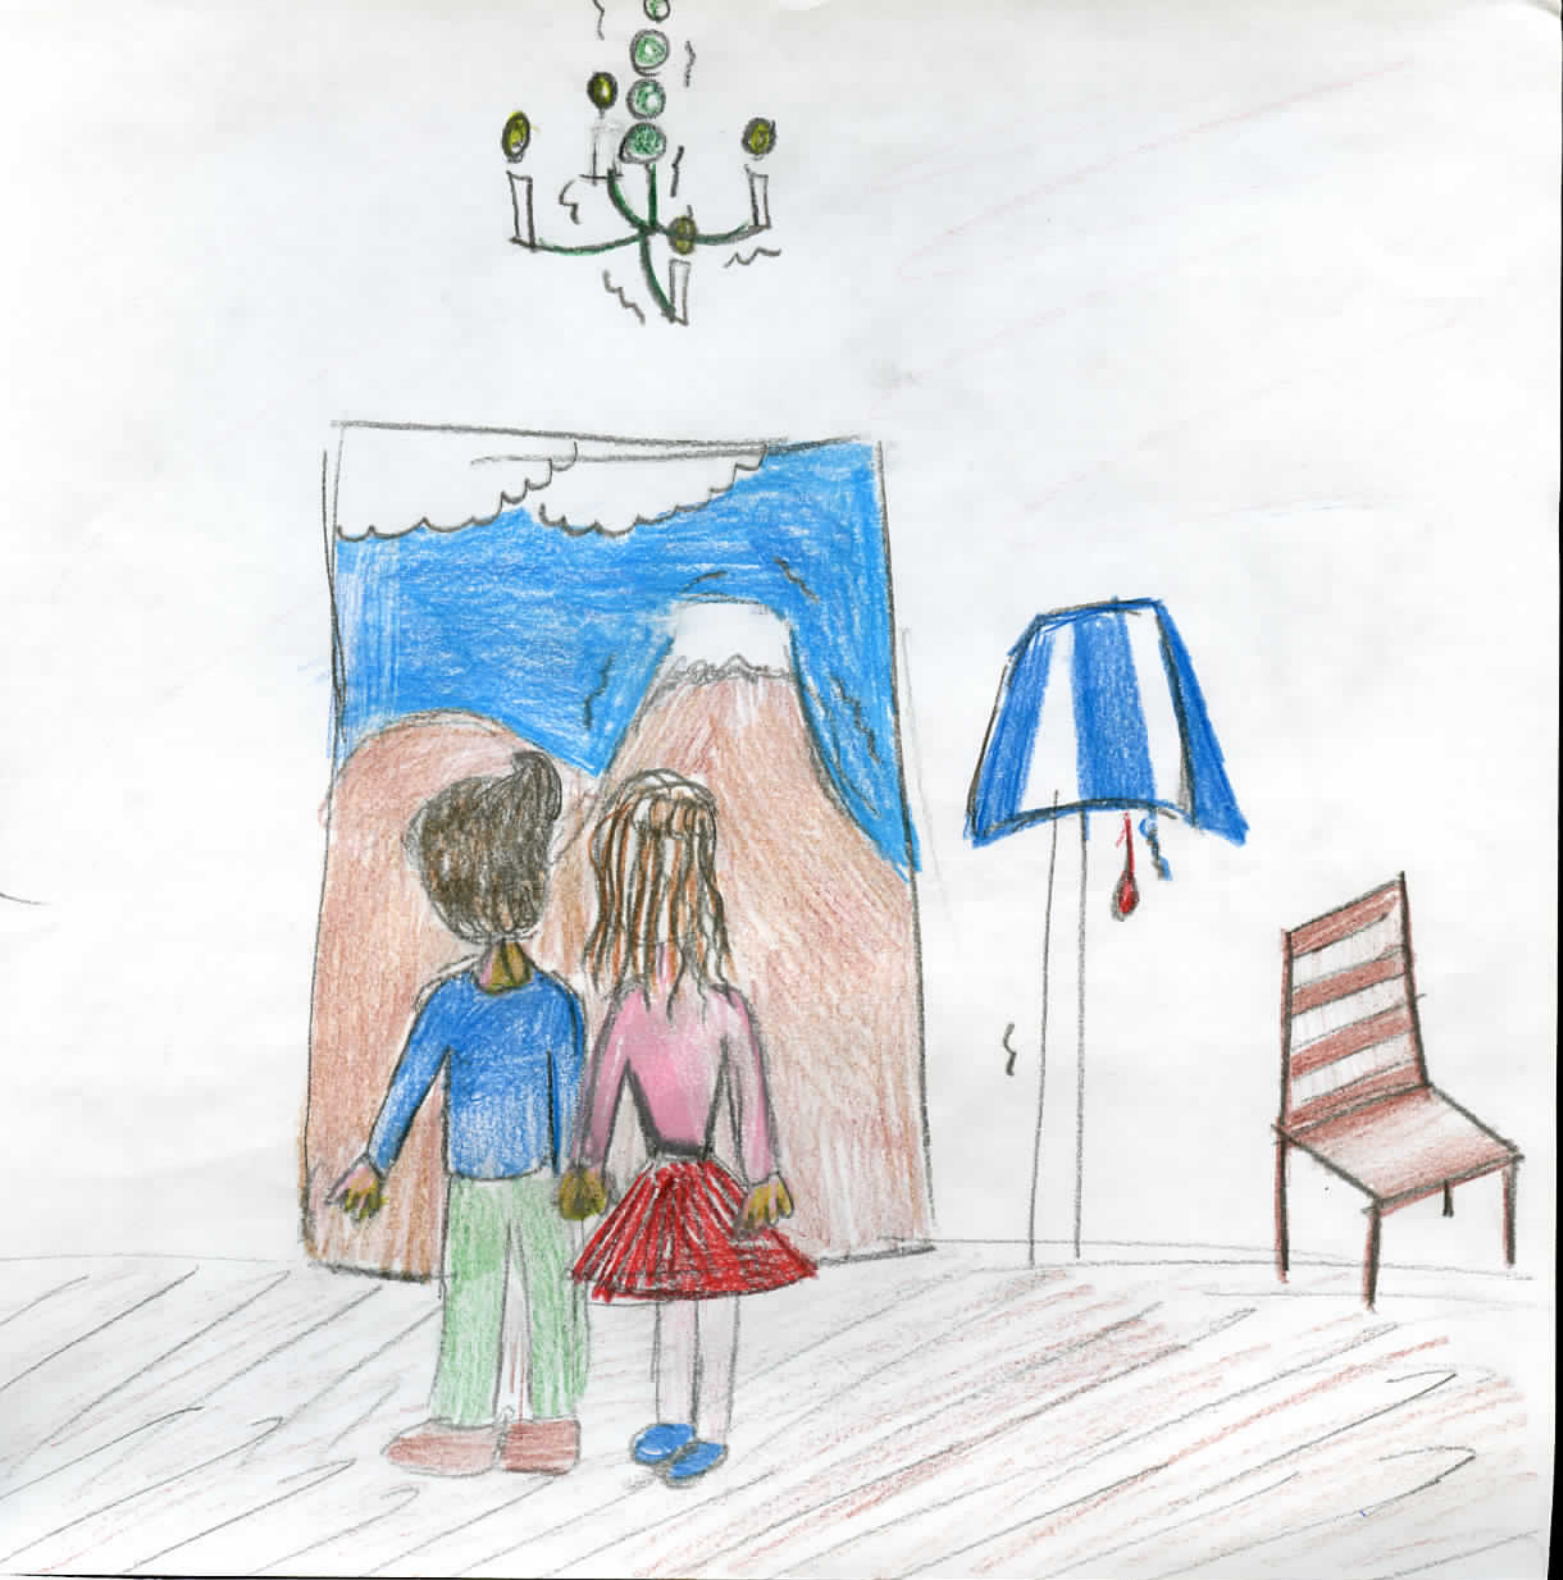

Un giorno Simone e Eleonora si affacciarono alla finestra e videro una cosa molto strana nel Vesuvio. Videro che si muoveva come se volesse staccarsi dal terreno. Andarono subito a chiamare i loro genitori dicendo loro quello che avevano visto. loro però ridendo gli dissero che non era possibile. I due ragazzi andarono a dire ai loro fratelli ma anche loro non li credevano.

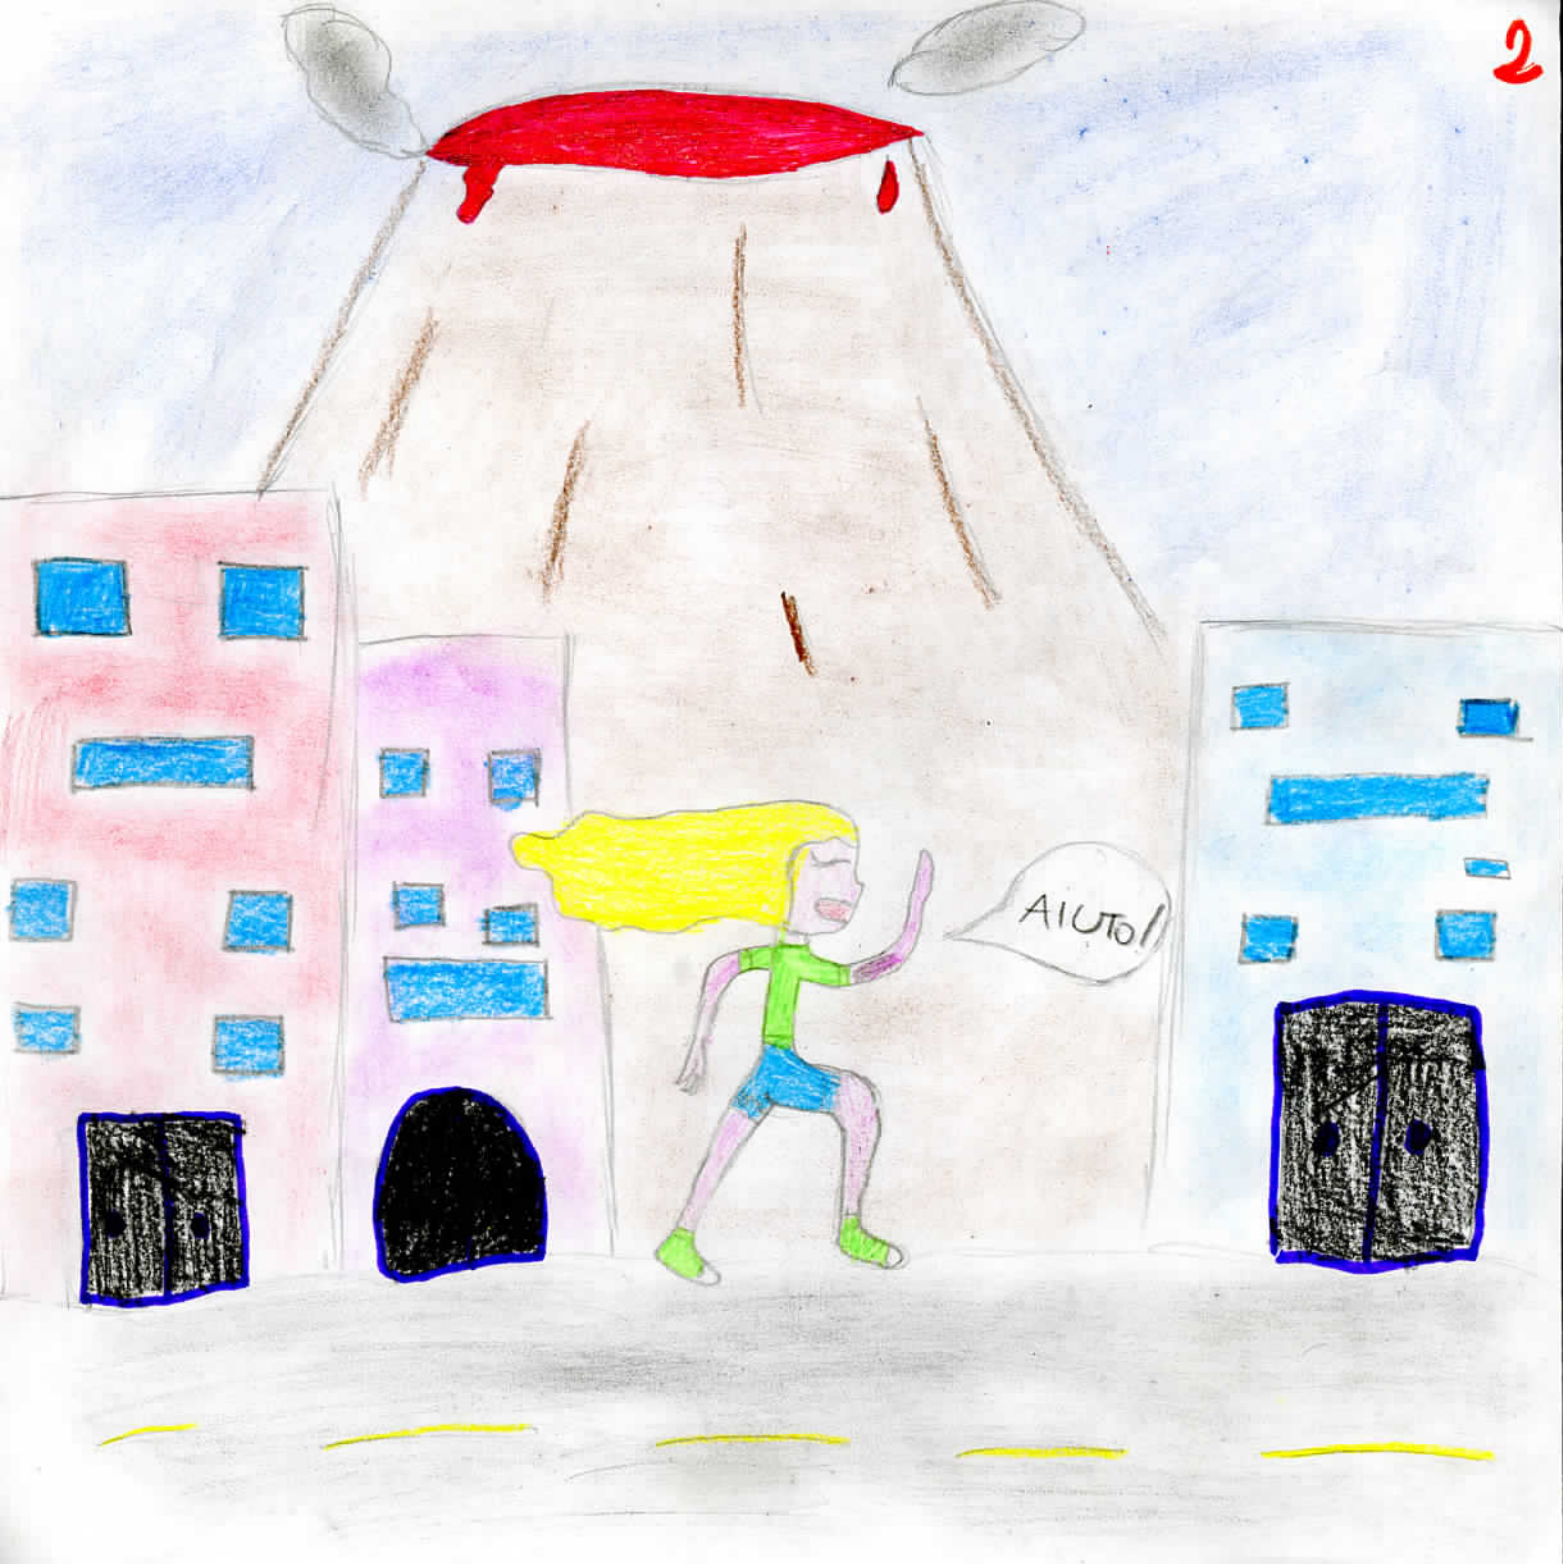

Ormanola si accorse che il vulcano stava per eruttare  
e cominciò a correre per la città ad avvisare tutti

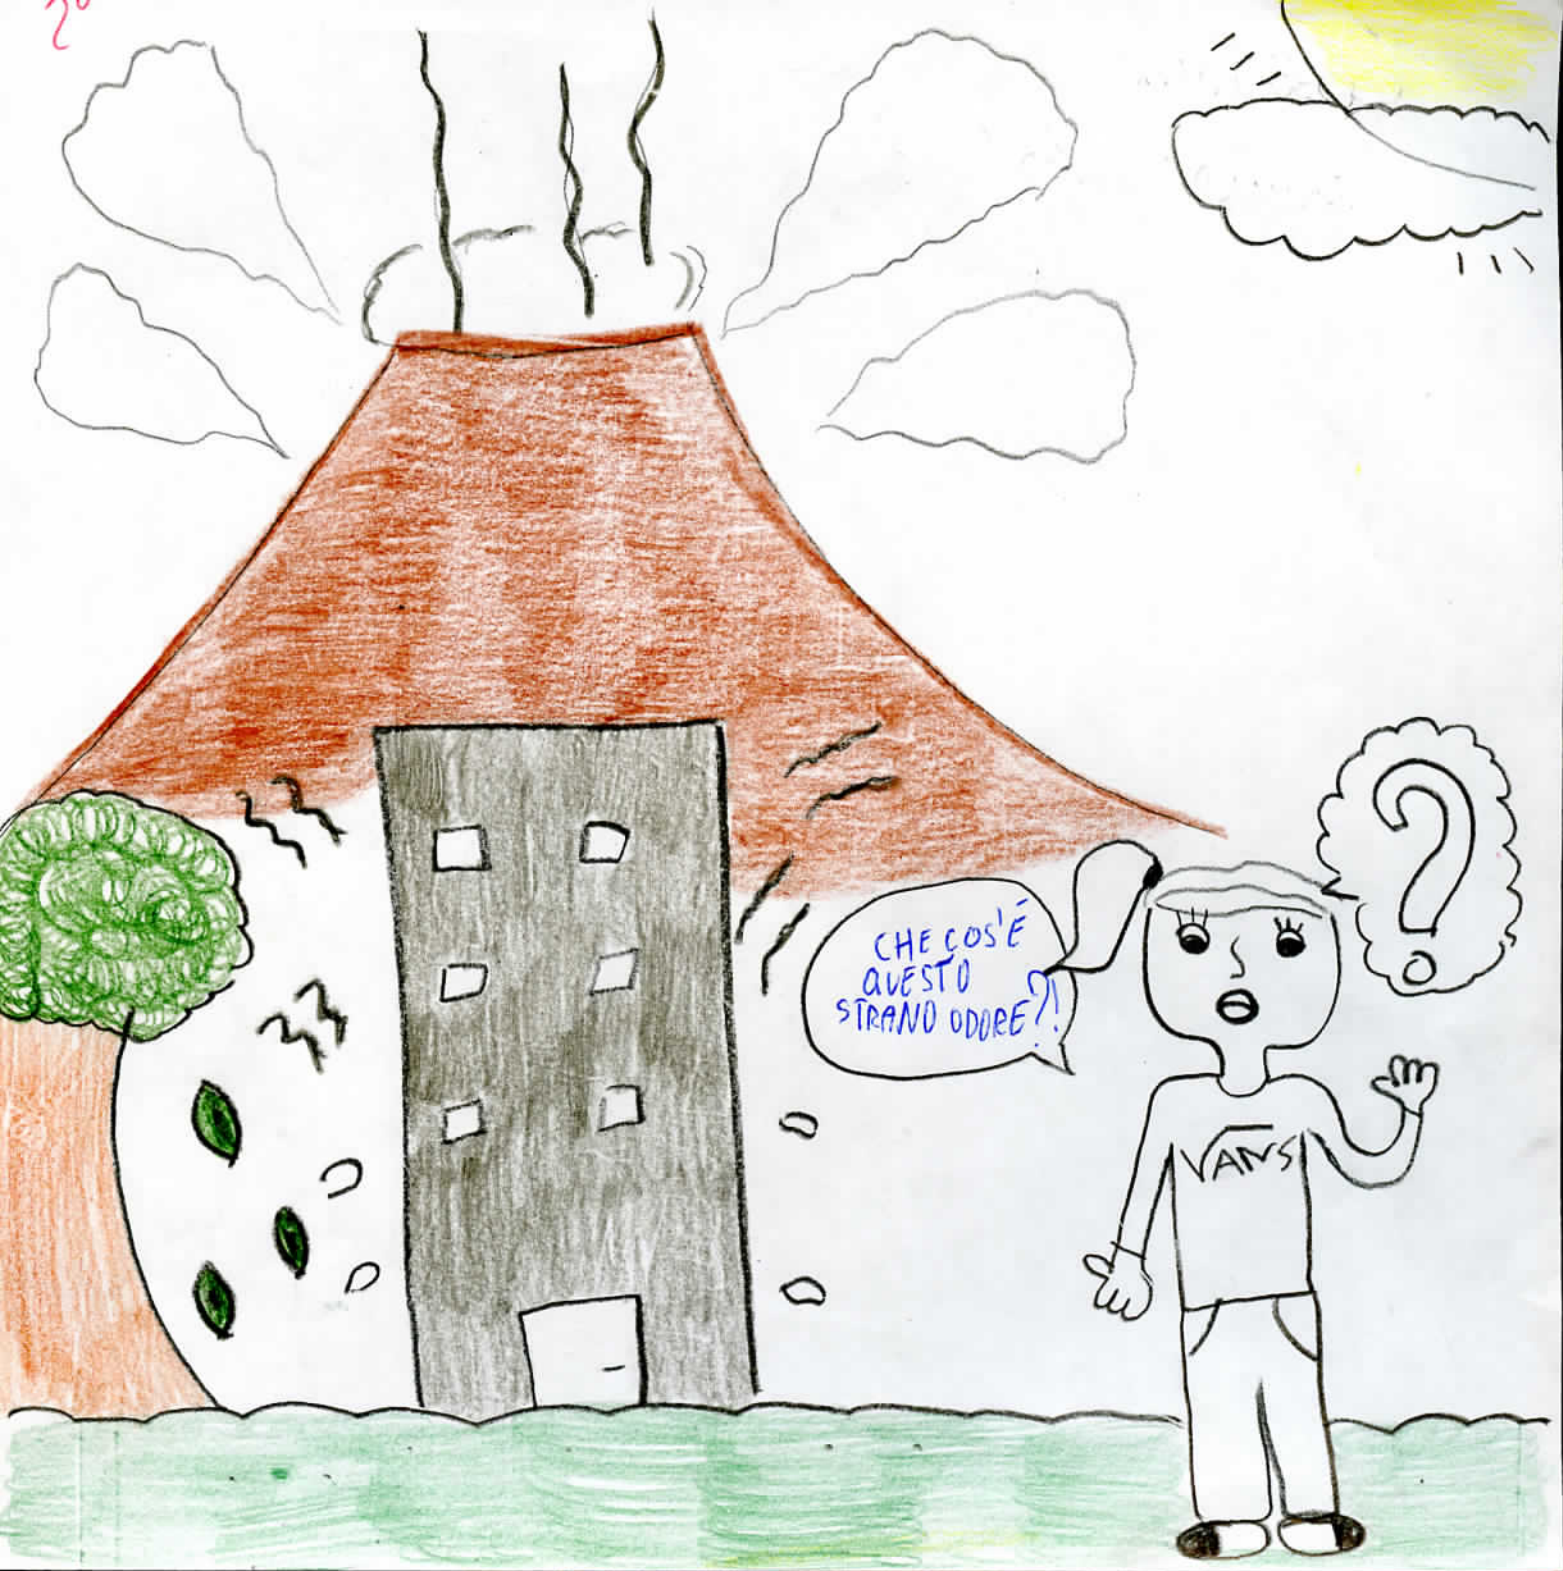

2° *duarrealia.*

margherita inizia a preoccuparsi.

Sentiva strani odori, i palazzi iniziarono a tremare e lo stesso giorno c'era un sole brillante, ma all'improvviso una mureta grigia coprì tutto.

Scena 2

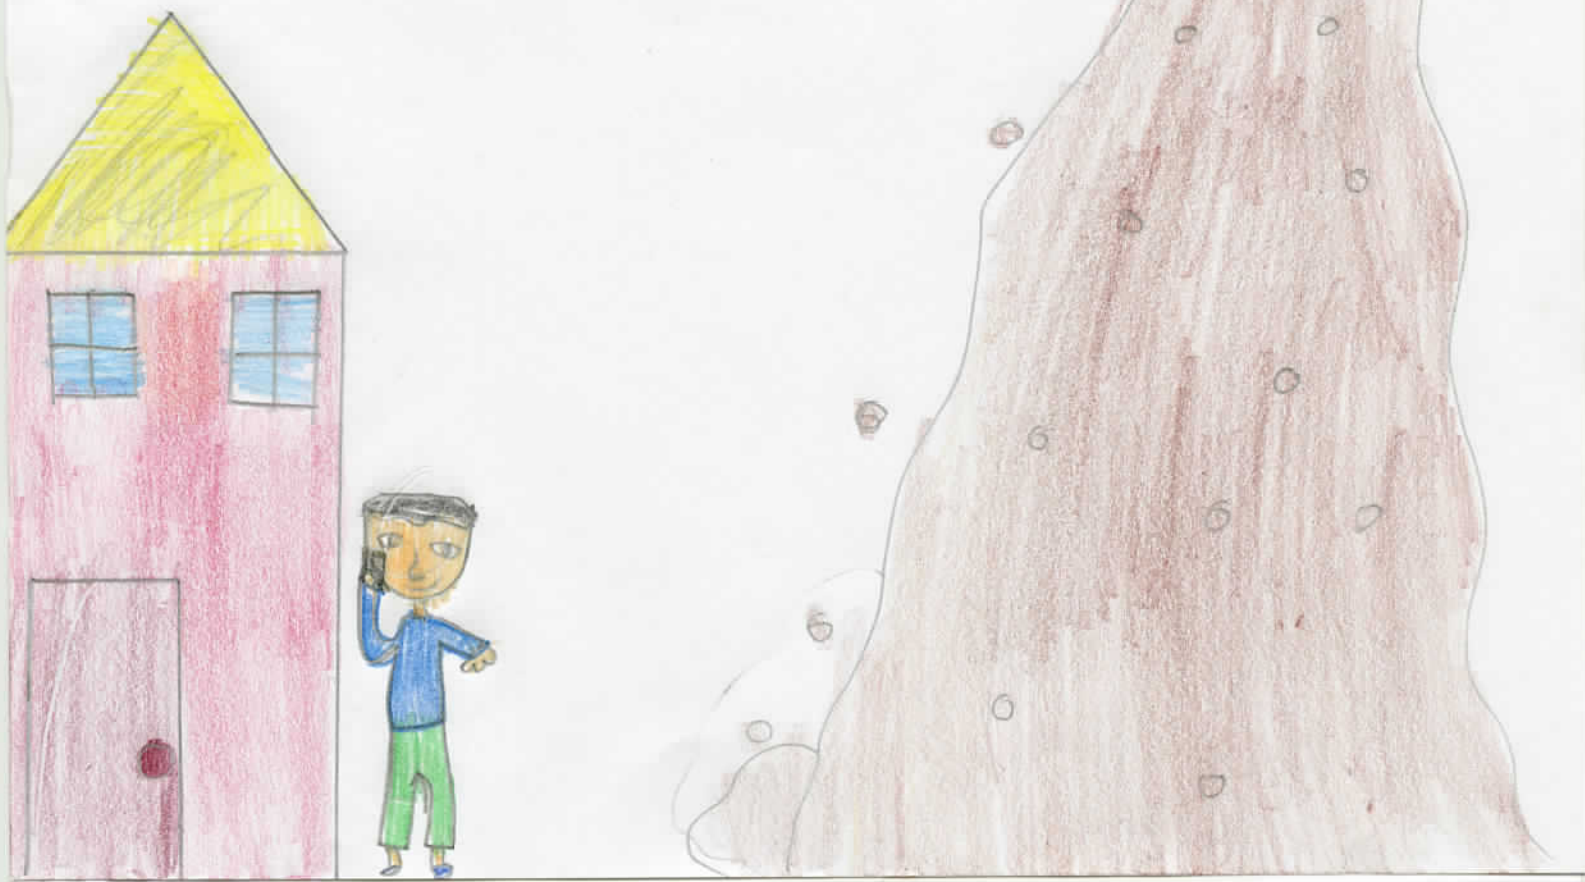

Scena 2

Henry iniziò a sentire dei rumori strani provenienti dal vulcano e iniziò a parlarne con il suo amico con il telefono

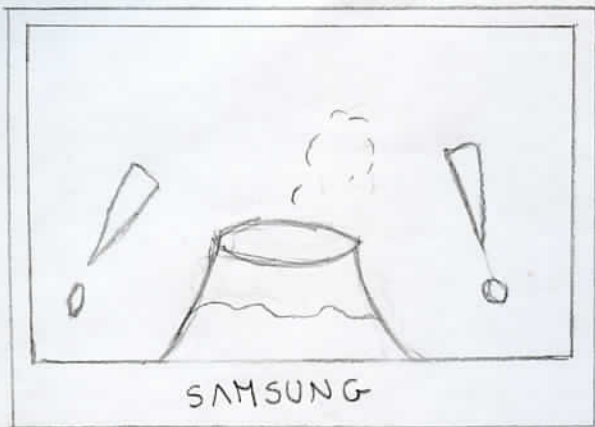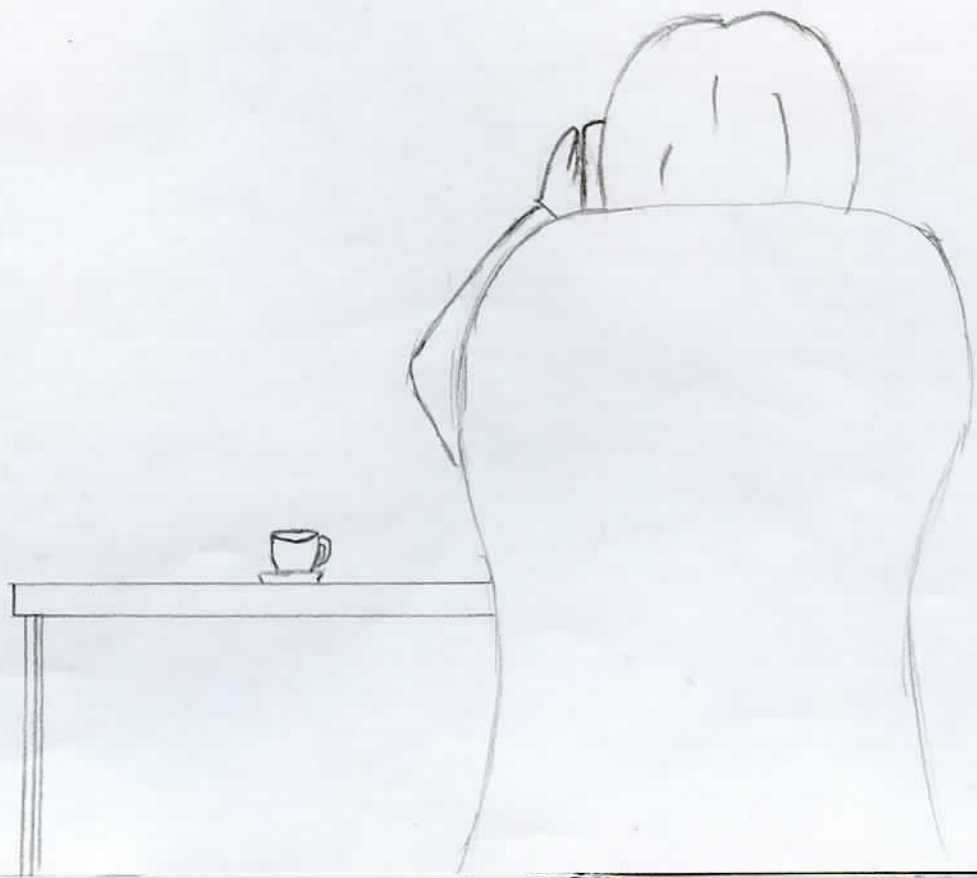

SIMIN ACCESE IL TELEVISORE E, FACENDO ZAPPING, SI FERMO' SUL CANALE DELLE NEWS, DOVE STAVANO TRASMETTENDO DELLE NOTIZIE RIGUARDANTI IL VULCANO VICINO, CHE LUI POTEVA AMMIRARE DALLA SUA FINESTRA. SIMIN ALLORA CHIAMO' J-HOPE, IL SUO MIGLIORE AMICO, PER CHIEDERGLI SE C'ERA DA PREOCCUPARSI SECONDO LUI. J-HOPE RISPOSE DI NO, PERCHE' ERANO SOLO NOTIZIE PASSAGGERE E MORTALI, SECONDO LUI. MA SIMIN NON SI FIDAVA E INIZIO' A PREPARARSI UNA VALIGIA PER RAGGIUNGERE I GENITORI A OSAKA.

## **Supplement 4 - Frame 3 – The eruption**

Selected examples of the stories' third frame, describing the volcanic eruption.

Drawings were realized by the pupils of primary and secondary schools listed in Table 1. The schools' enrolment into the project was discussed by schools' board and then presented to the families at the beginning of the school year, as a part of the school curriculum (Piano Triennale di Offerta Formativa). We did not collect any personal information about the participating students who always worked in pairs or small groups. Students were explicitly asked not to print their full names on their compositions. The production of text and drawings was not compulsory and students were free to decide the degree of their involvement in the exercise. The stories we collected were freely donated to be used for research purposes such as the present manuscript. Originals are kept into the Edurisk archives.

The supplement is provided as a portfolio, with examples of the collected materials.



3

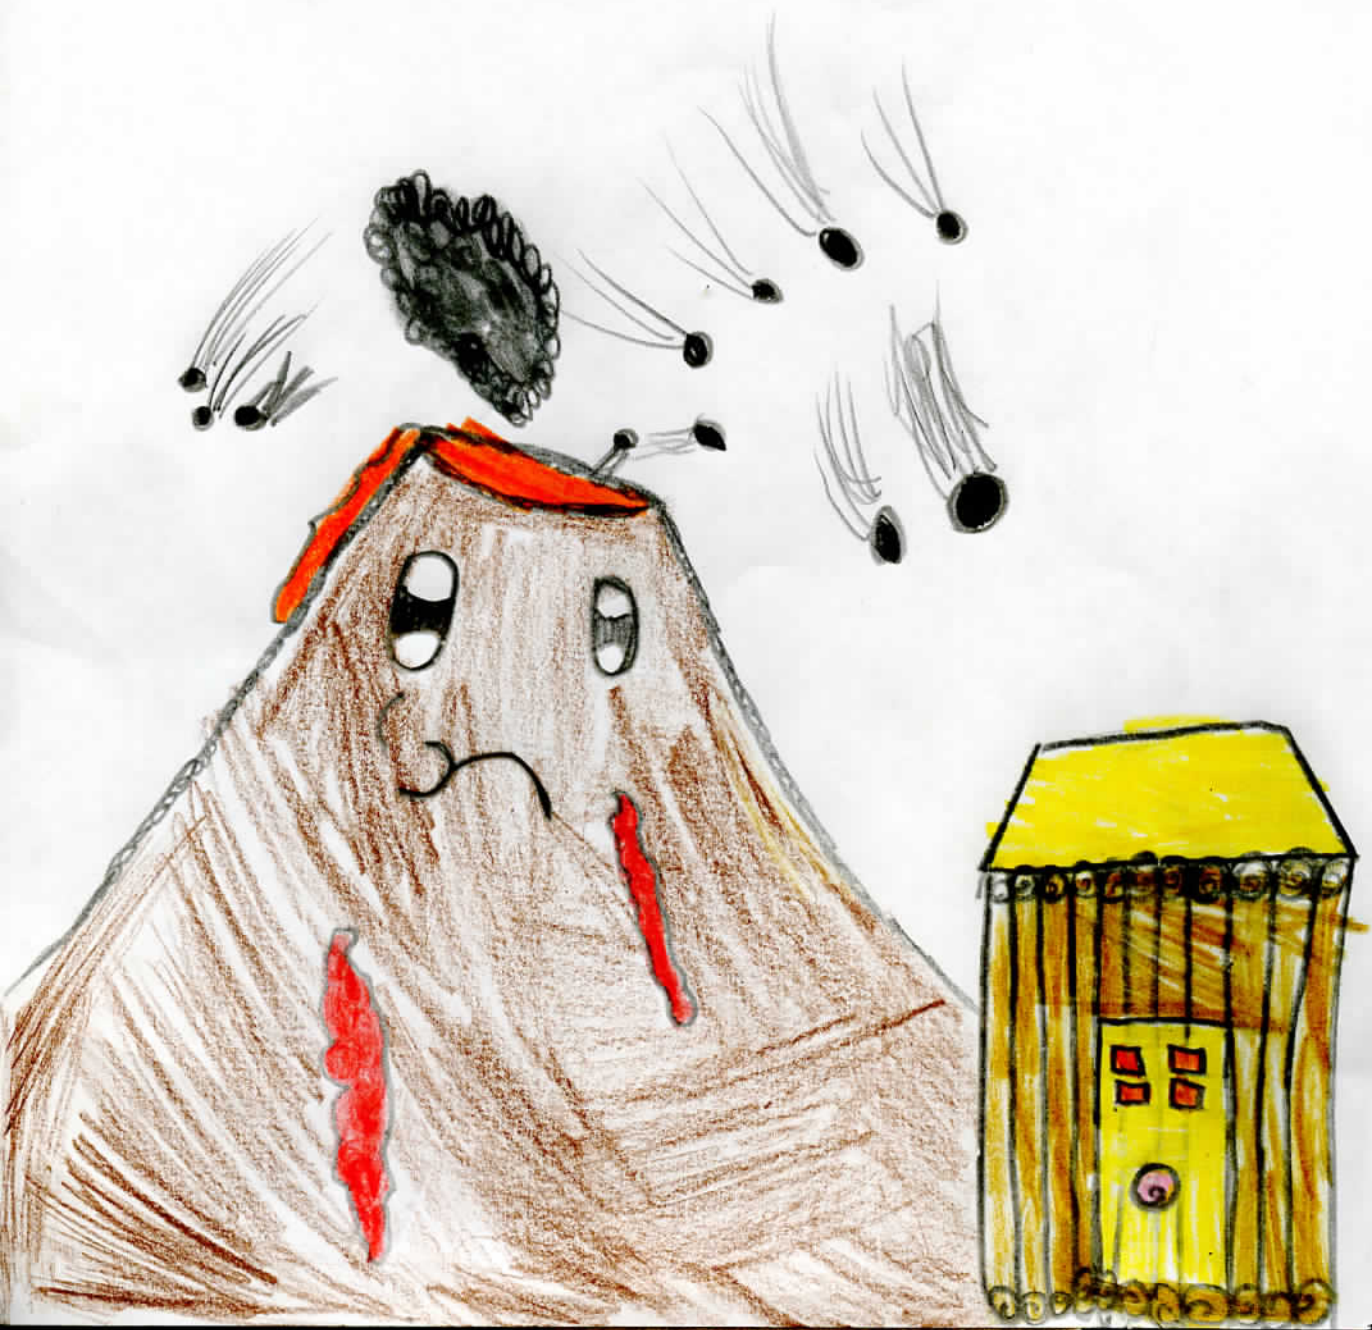

Dal cratere del vulcano comincia ad uscire della lava. I protagonisti e gli altri entrano nella capanna di riparo. Poi arriva un mago e pluvierora la maceril.

3

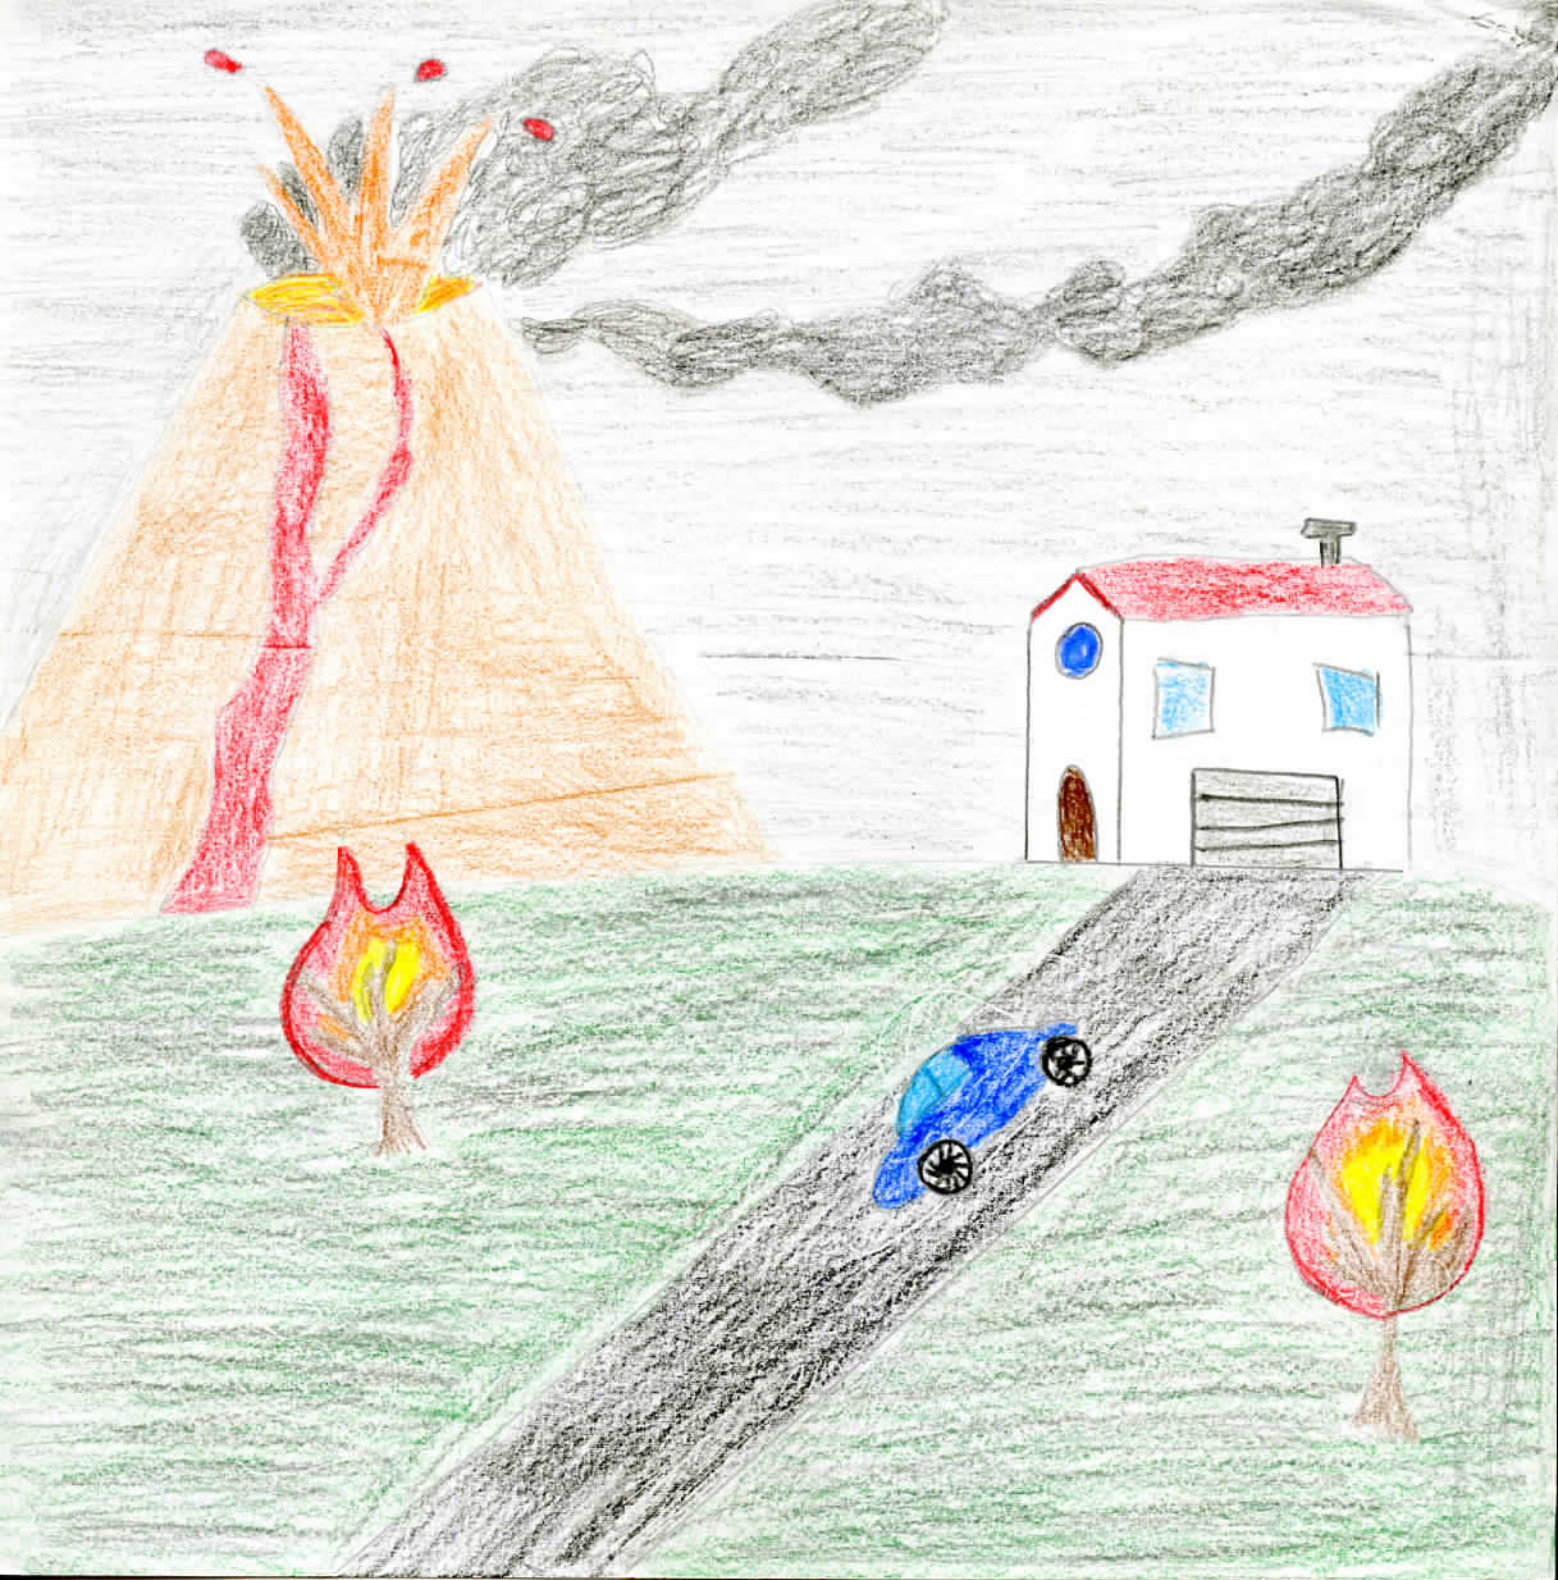

GIUSEPPE E LA FAMIGLIA SI MISERO IN MACCHINA E PARTIRONO. GUARDANDO IL TERRENO DAL FINESTRINO VIDERO CHE ERA GRIGIO, IL TERRITORIO PIENO DI FUMO, GLI ALBERI CHE PRENDEVA IL FUOCO, IL VULCANO CHE ERUOTAVA TANTISSIMO...

3

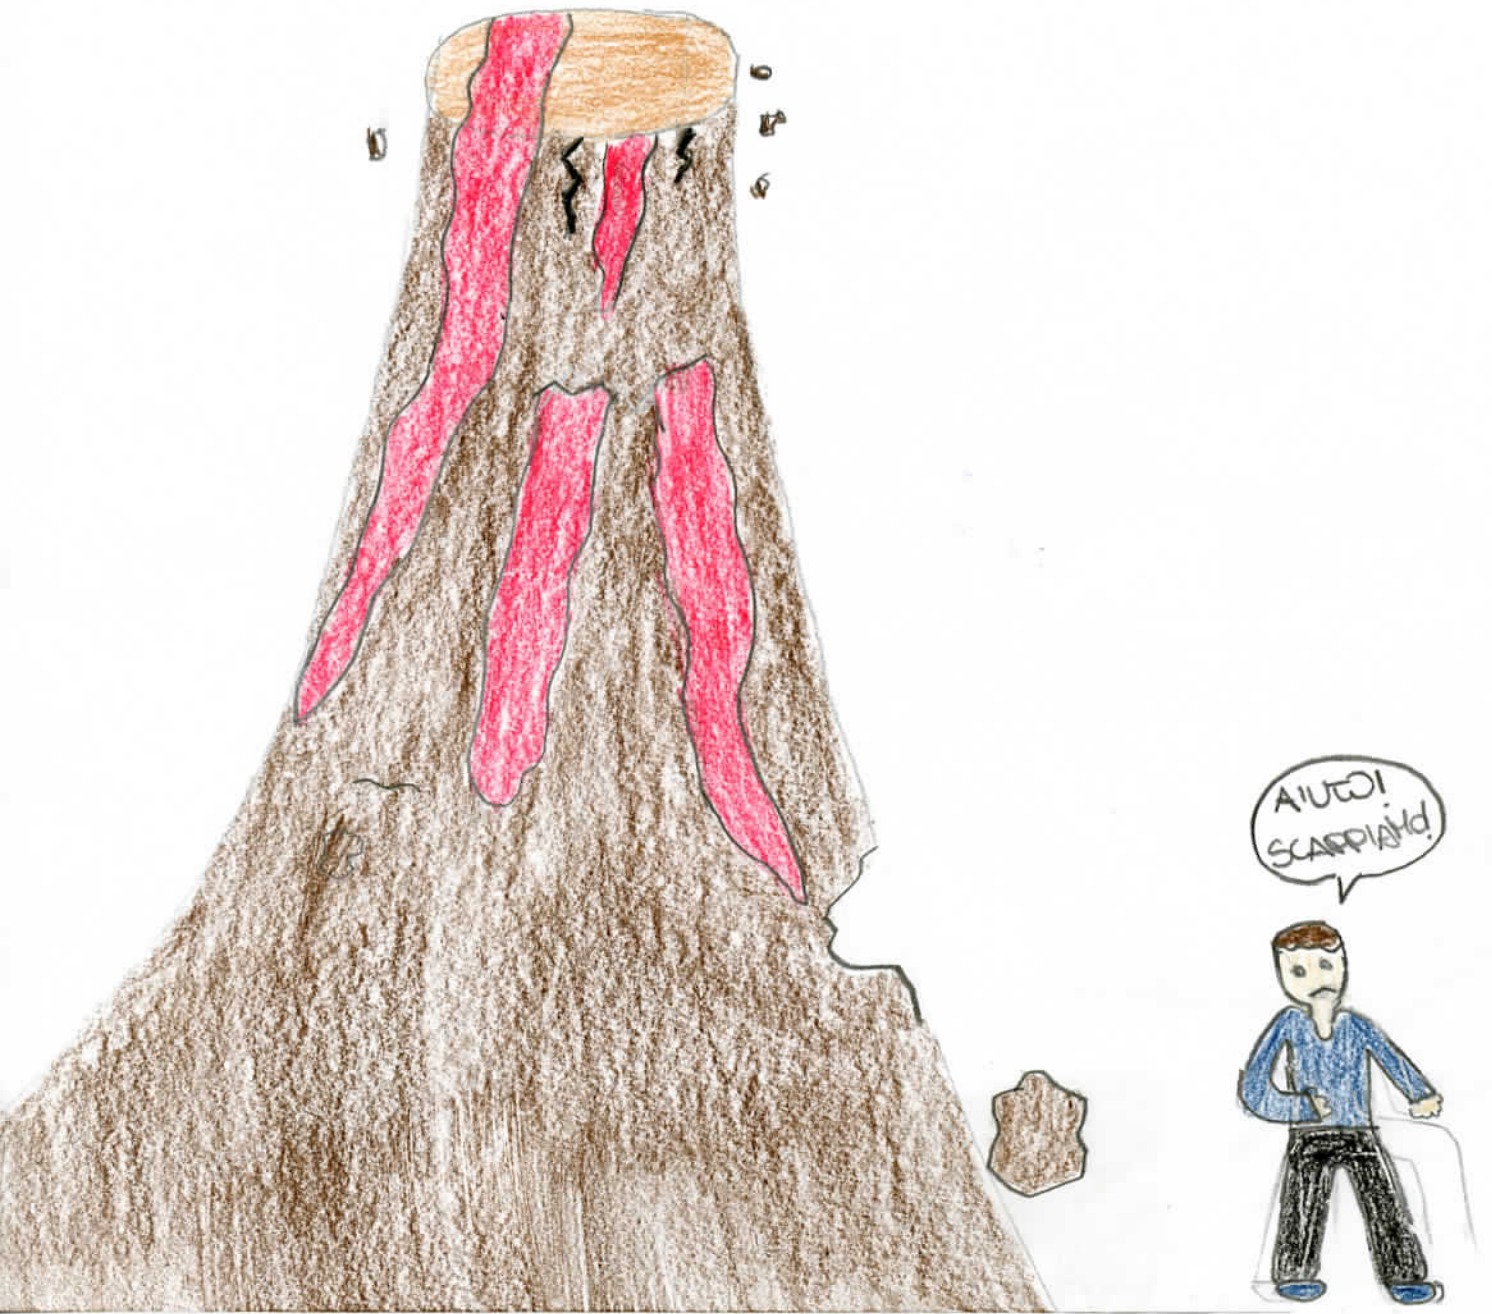

Dopo poco arrivò una scossa più forte e il vulcano incominciò ad eruttare pietre, lapilli e lava bollente. Per loro arrivò il momento di scappare. Avvisarono subito la polizia che avvisò tutto il paese e in quel momento ci fu un momento di panico, e' era gente che correvano dappertutto e urlava. La polizia disse di scappare e si andarono a rifugiare nella parte più lontana dal vulcano.

3

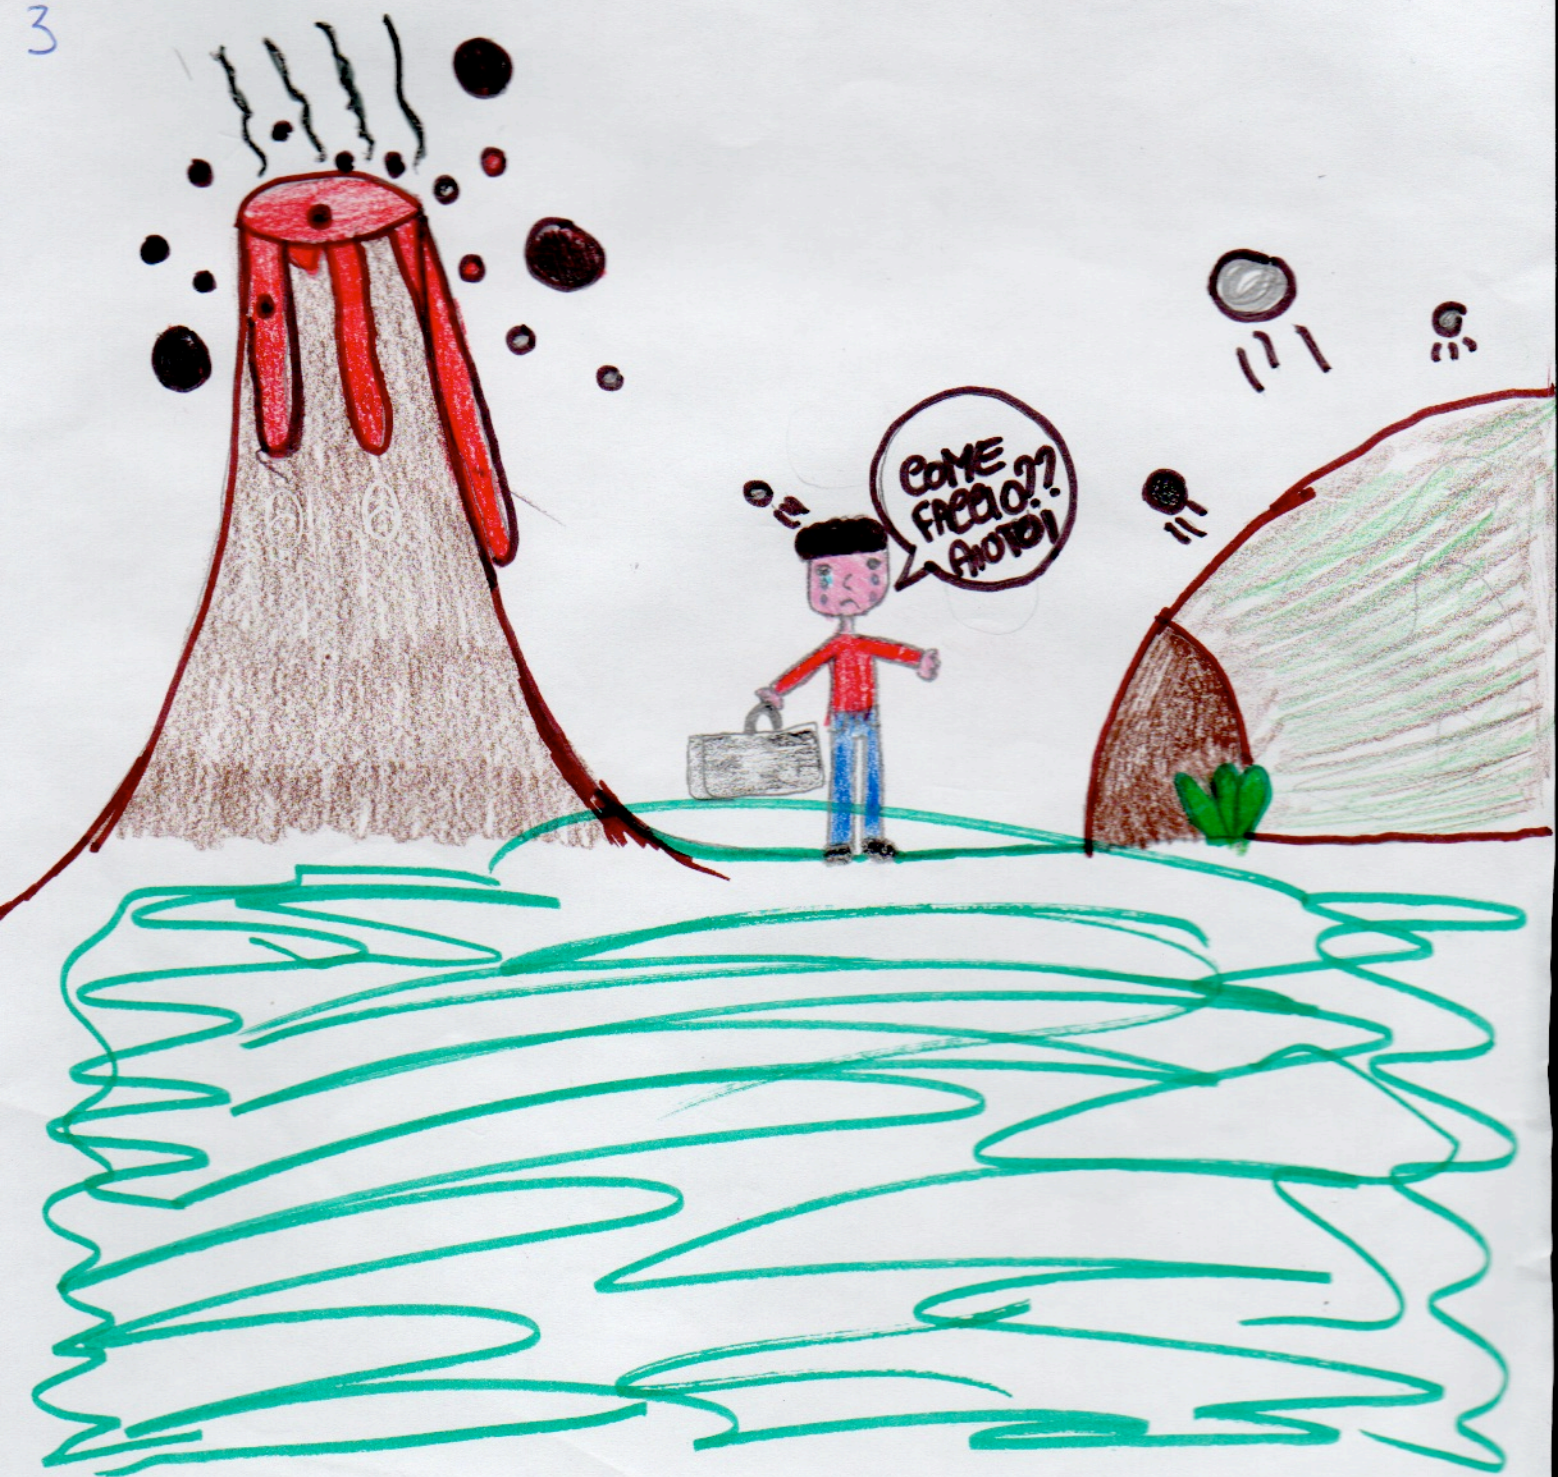

Viki non riesce a scappare perché il vulcano comincia ad eruttare e  
 cadono tante pietre grandi e piccole.  
 Viki comincia a piangere ha paura di morire il vulcano torna ad  
 essere marrone, tutto comincia a tremare e la capanna di Viki si  
 rompe quindi lui non ha <sup>più</sup> un rifugio.

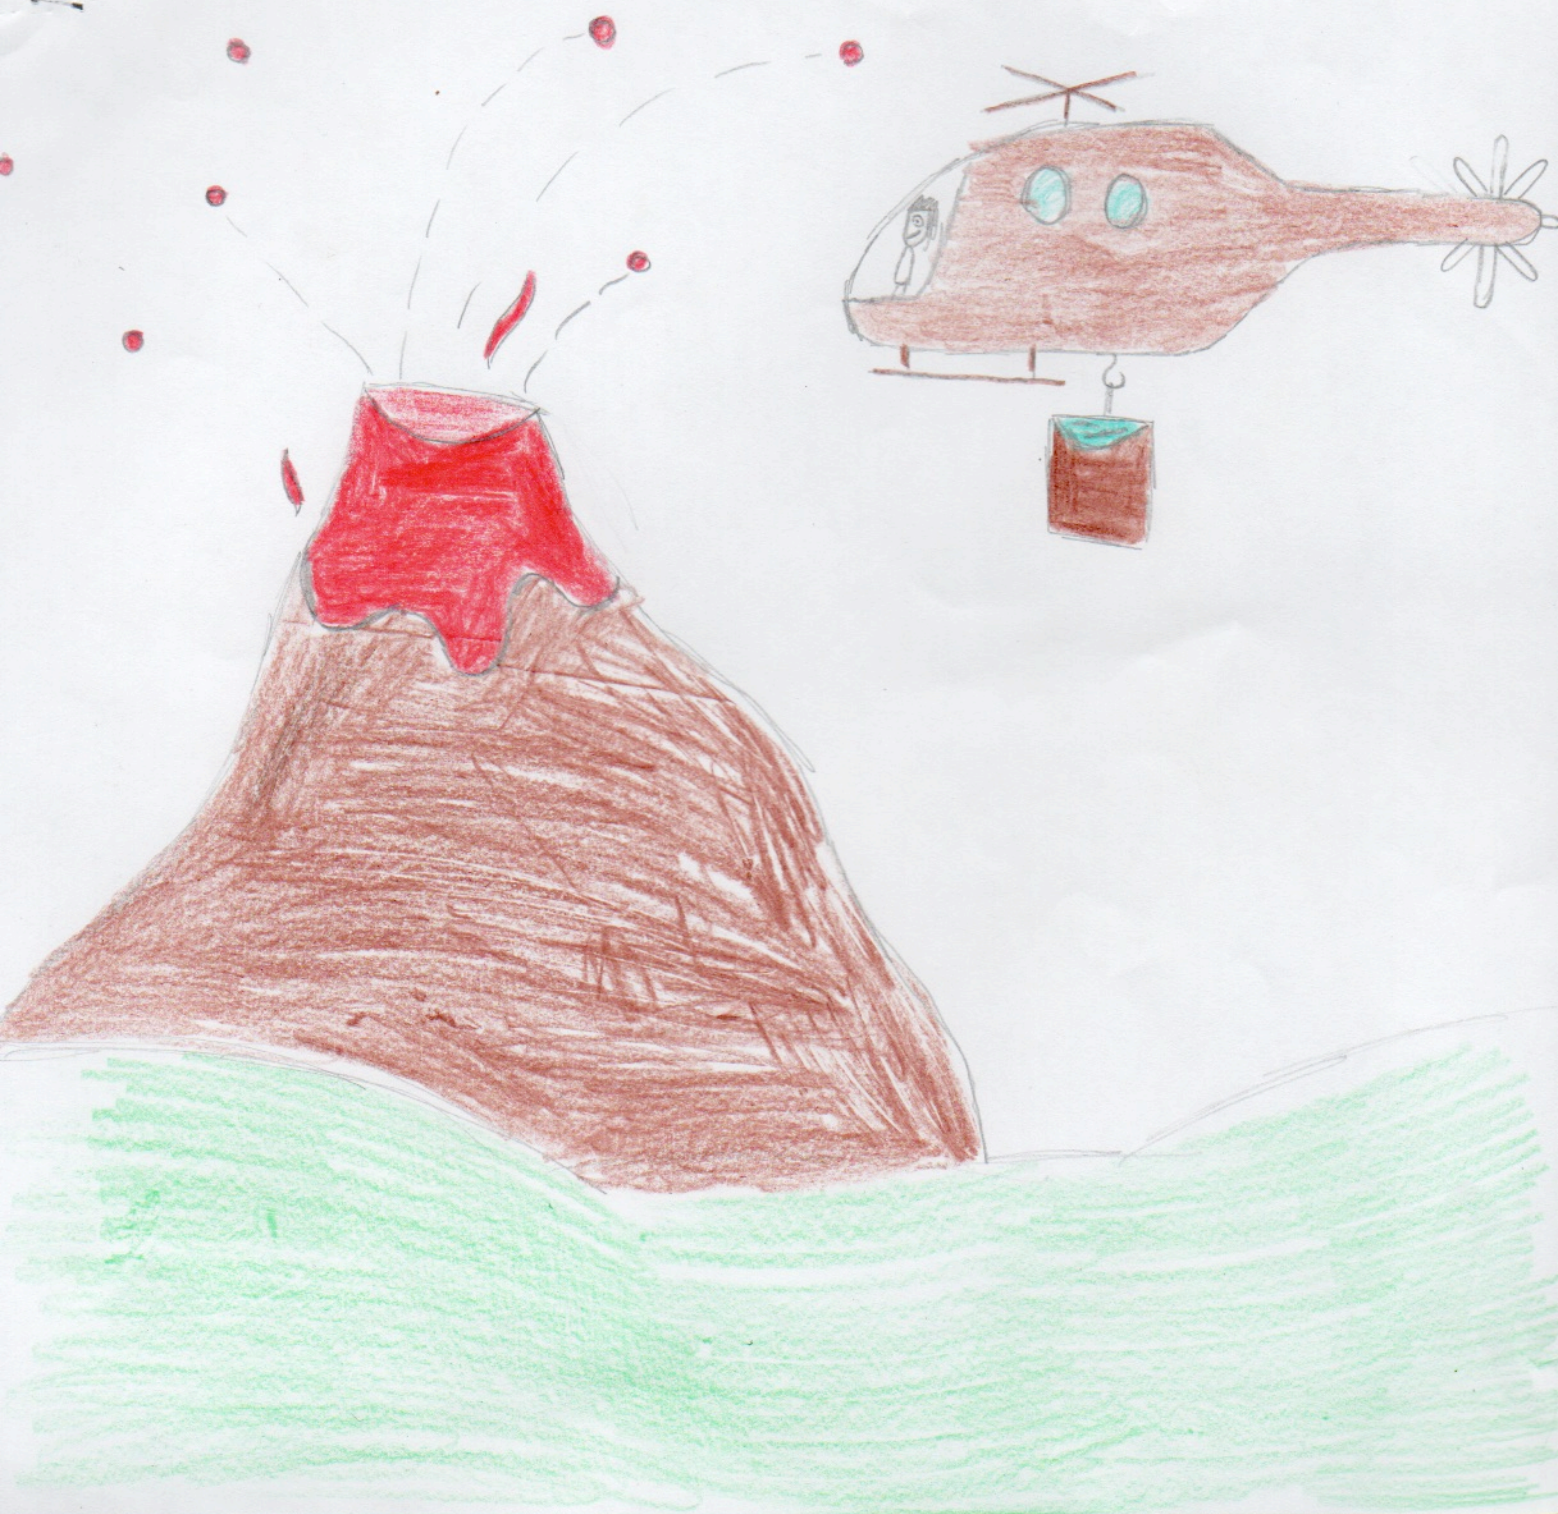

Ad un certo punto il vulcano eruttò, così Harry costruì in 40 minuti un elicottero di legno in modo da poter buttare ~~grazie all'elicottero e un cassonetto~~ <sup>un cassonetto</sup> pieno di acqua nel vulcano per spegnerlo

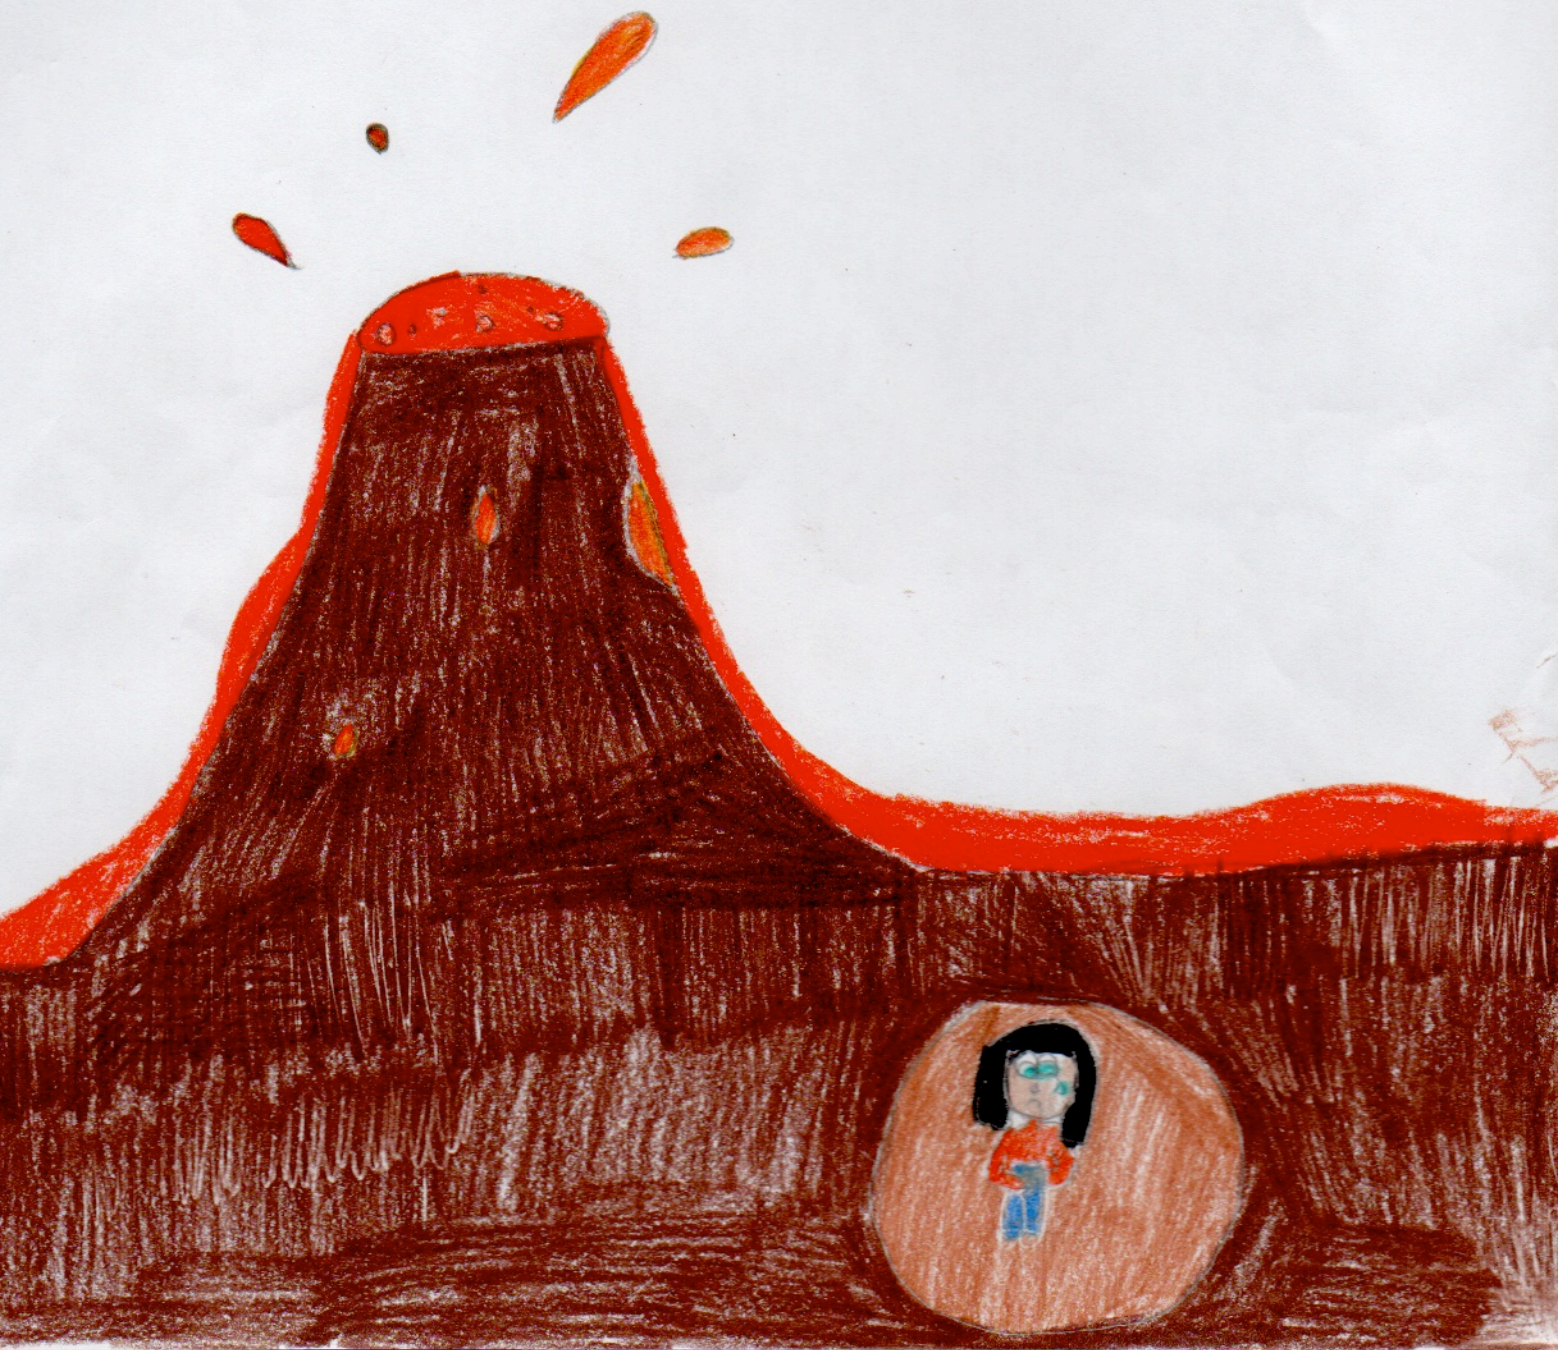

C'era una ragazza di nome Michela che aveva 13 anni ~~che~~ <sup>ed</sup> era stata abbandonata dai genitori vicino un vulcano, l'anno dopo ci fu un'eruzione e la bambina per salvarsi si fece una buca sotto terra. ~~Per~~ Per fortuna si salvò dall'eruzione, però era rimasto solo lei. E aveva anche molta fame.

Scena 3

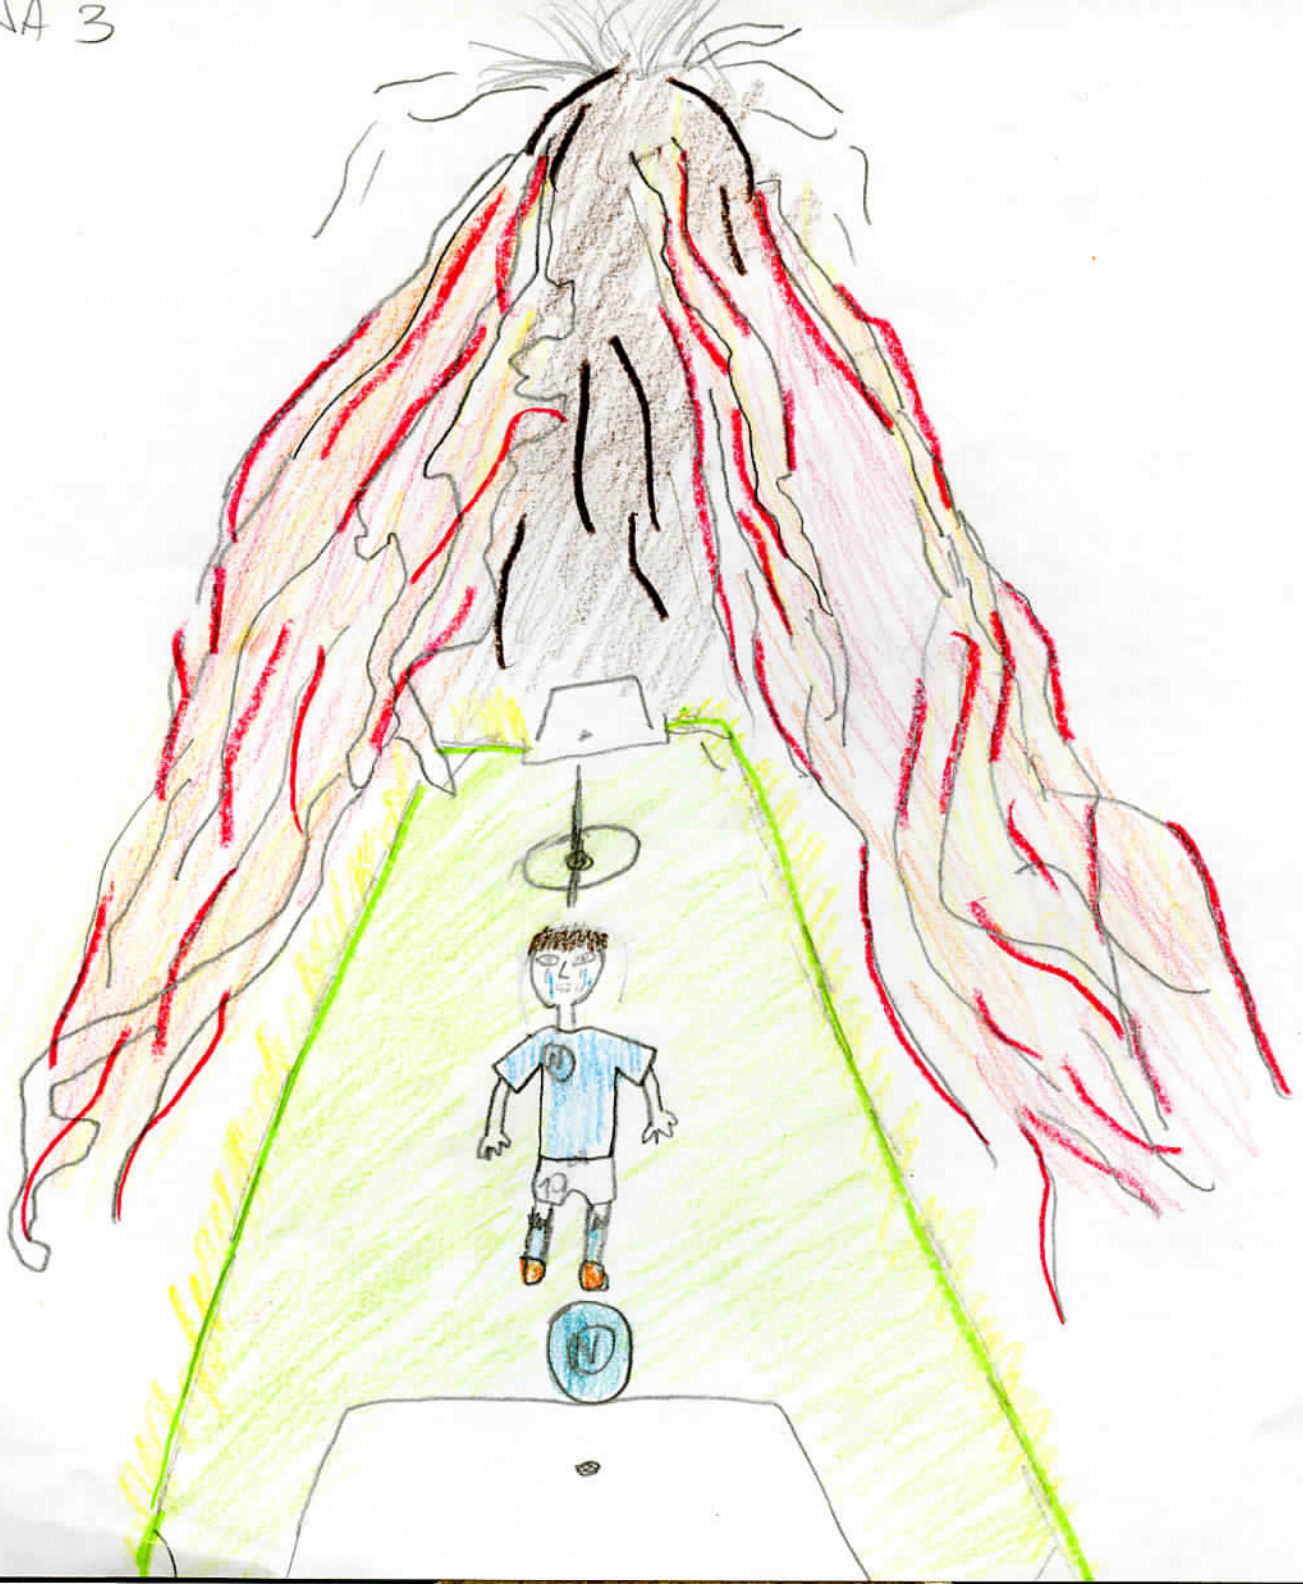

Scena 3

Cito il giorno seguente prese il campetto e pallone e andò ad allenarsi. Ad un certo punto il vesuvio eruttò. Il ragazzo disperato continuava a giocare fregandosi della lava che usciva dal vulcano. tutta la gente fuori dal campo a scappare e invece Cito era se nel campo. Il campetto è come se fosse miracolato perché il campetto non venne inghiottito dalla lava.

SCENA 3

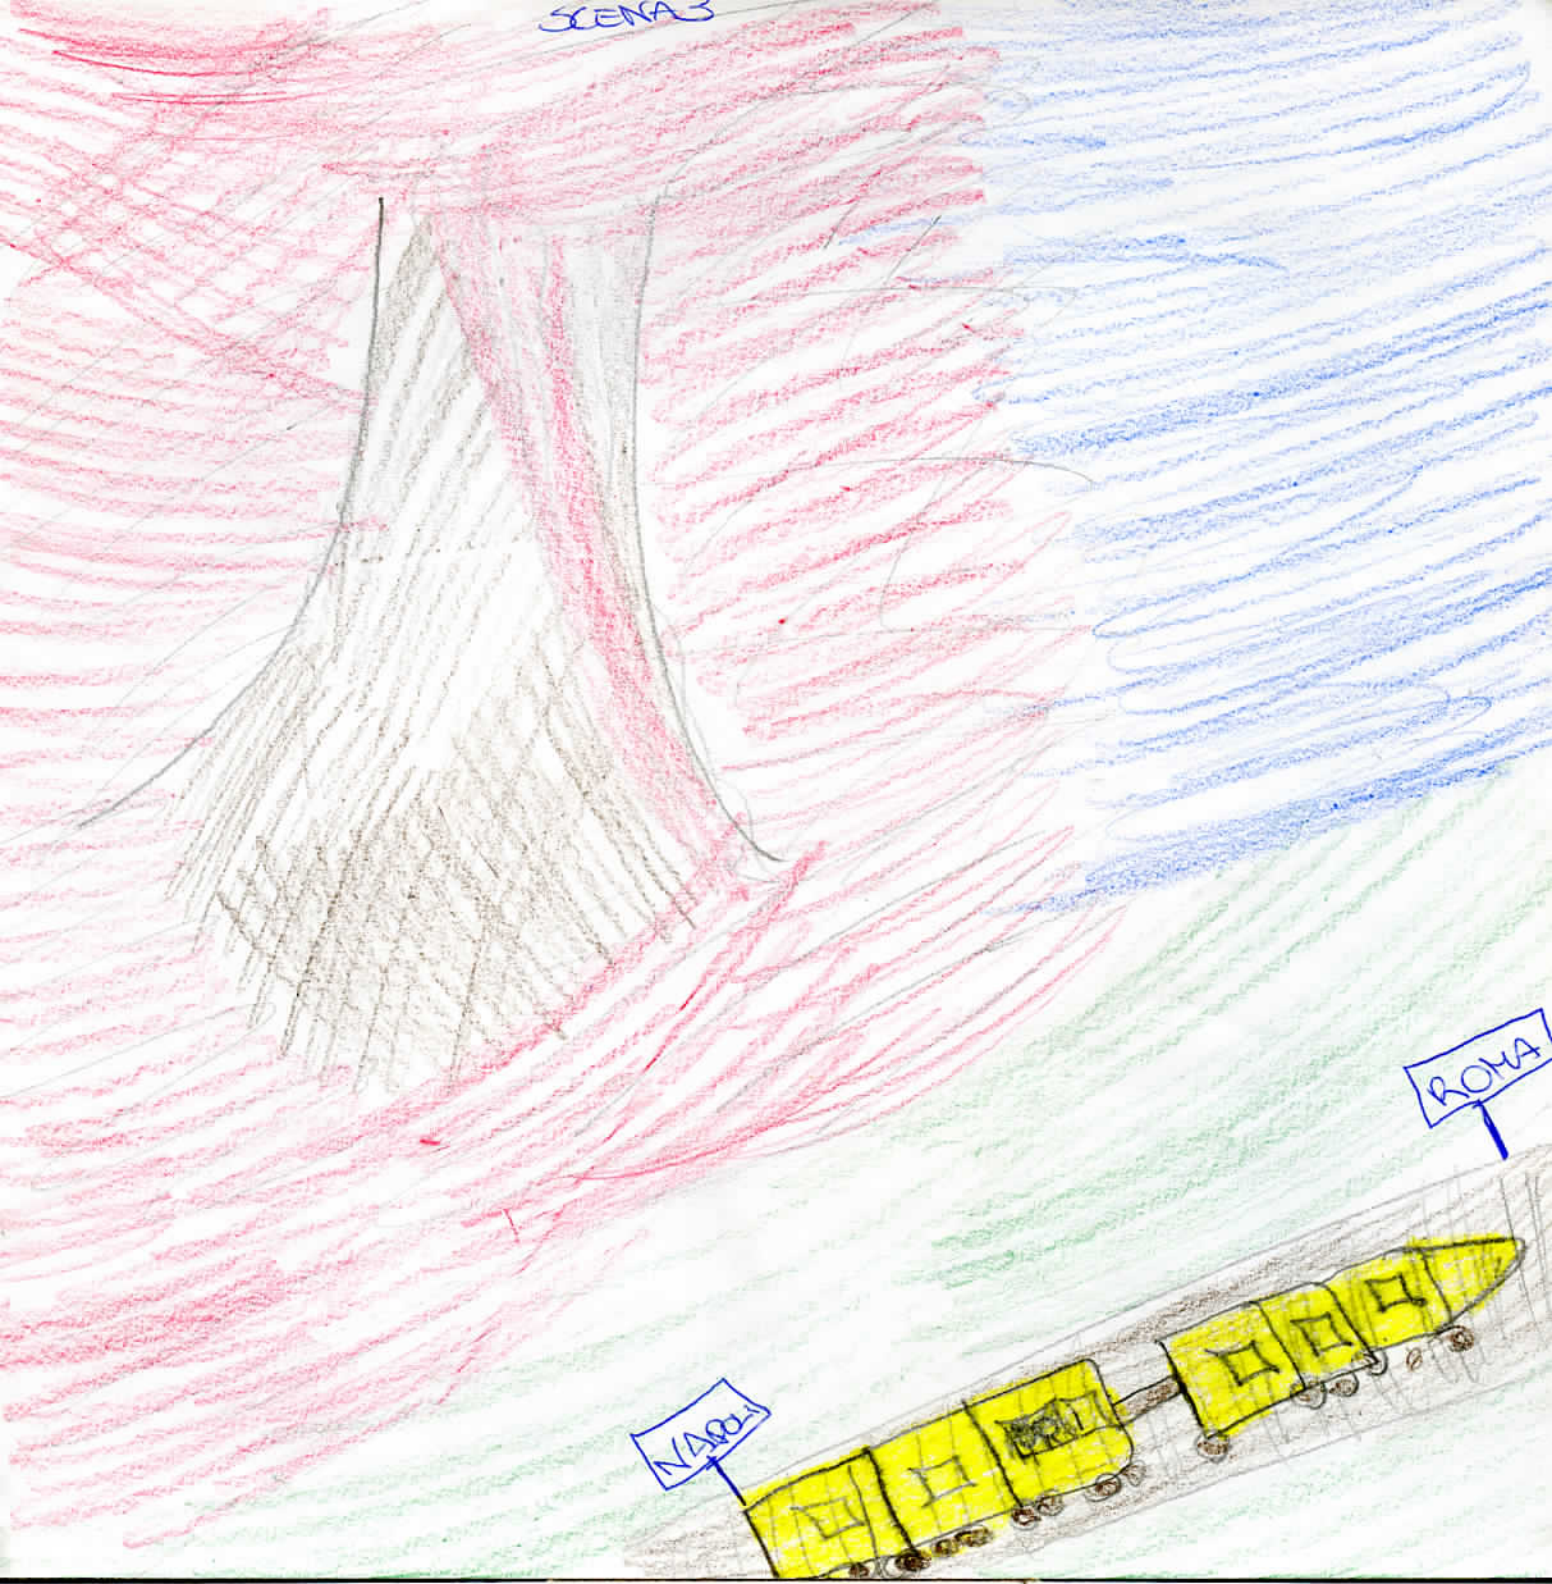

Scena 3

Maria scappa con l'amica per andare a rifugiarsi.  
Vanno nella ferrovia, prendono il treno ed aspettano  
la fermata più lontana. Roma. La città è piena di  
cava. E la casa di Maria si bucia



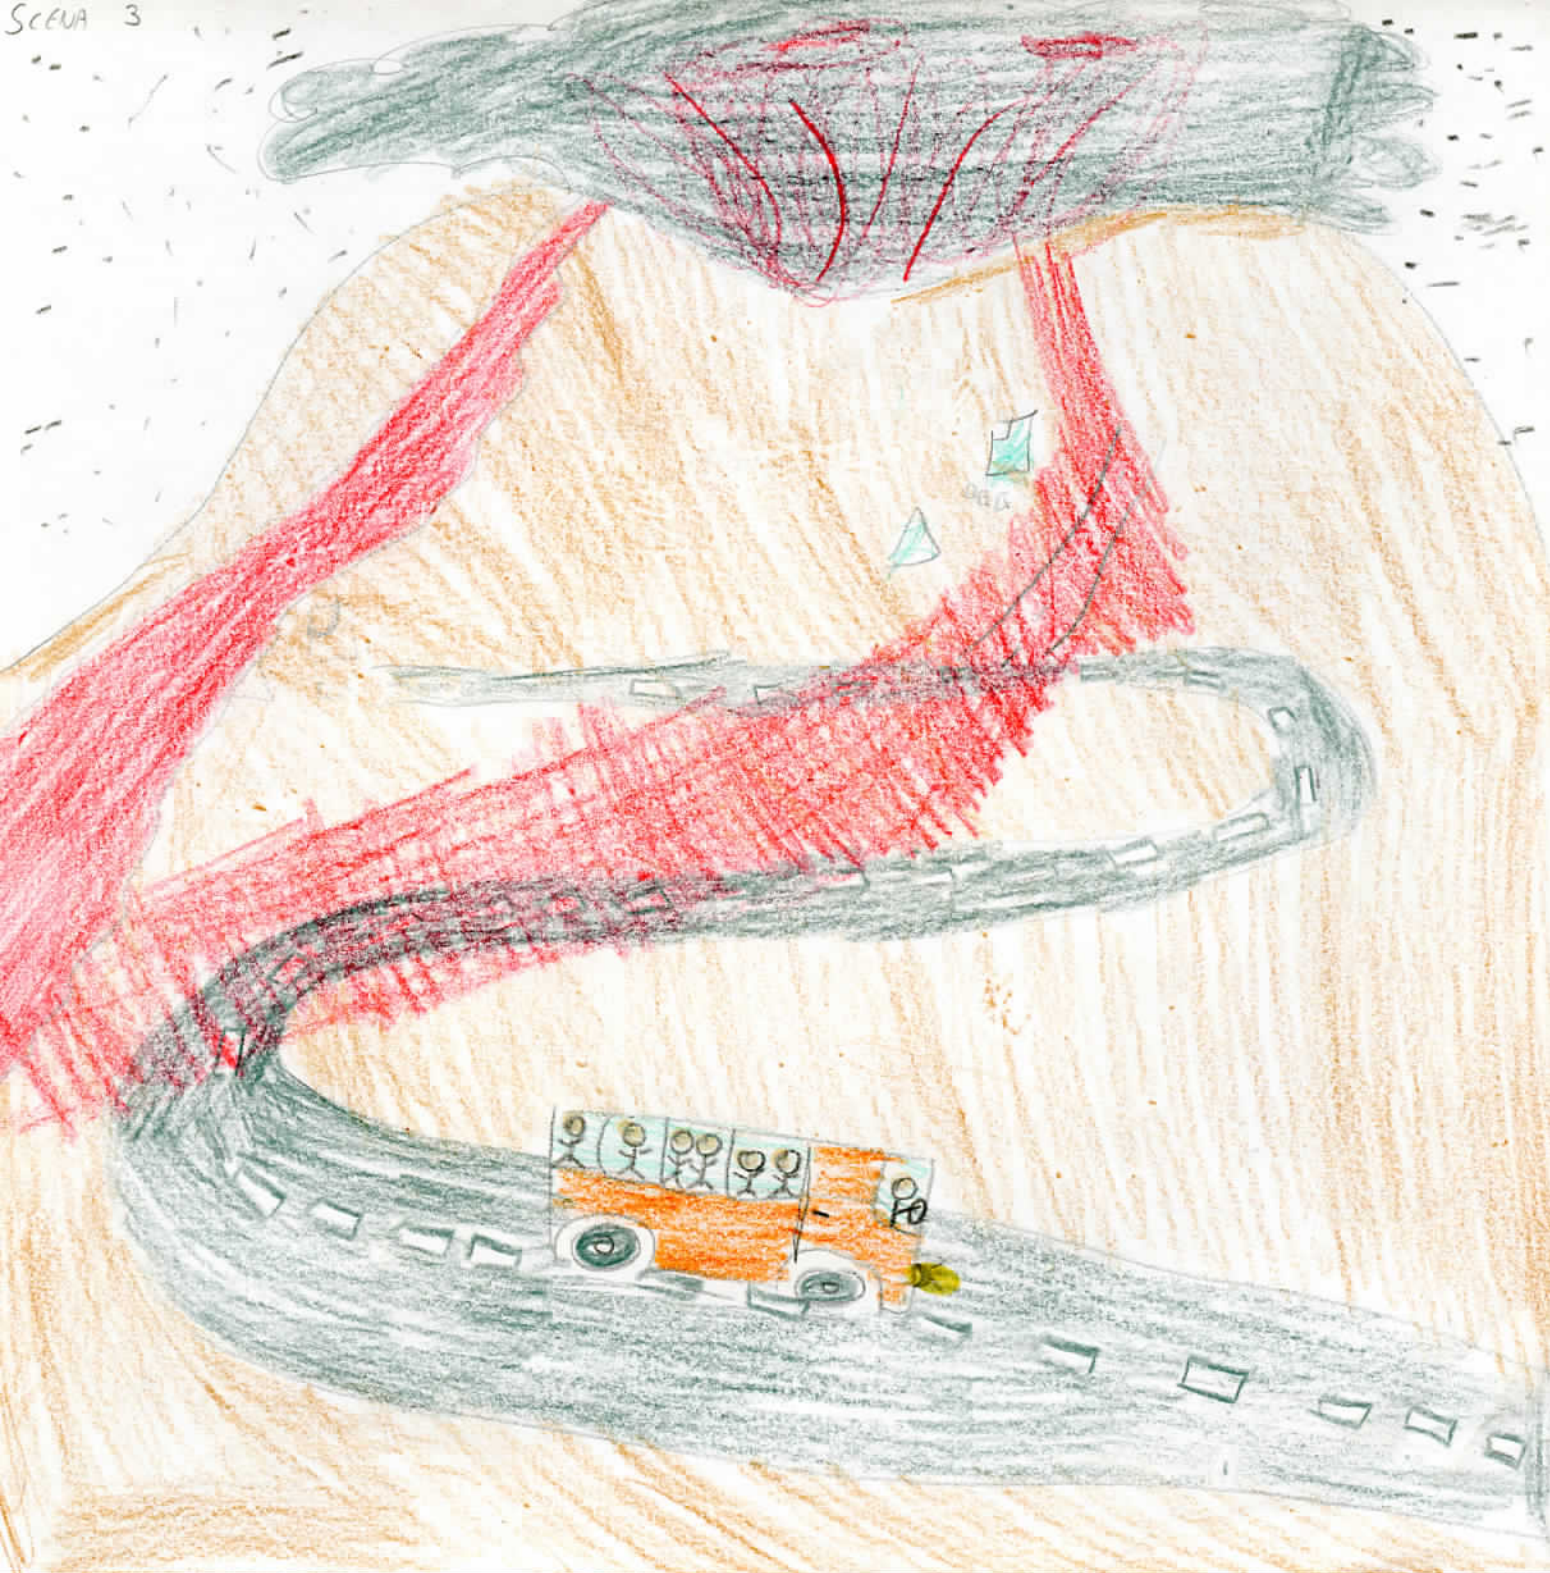

SCENA 3  
Paolo e Stefano corrono a salvare la persona con la casa terremotata e salgono la stradina del vulcano con il loro pulmino. Il vulcano scatta dal tetto e si vede un fiume di lava scendere dal monte. I due si dirigono verso il porto e cercano una barca funzionante

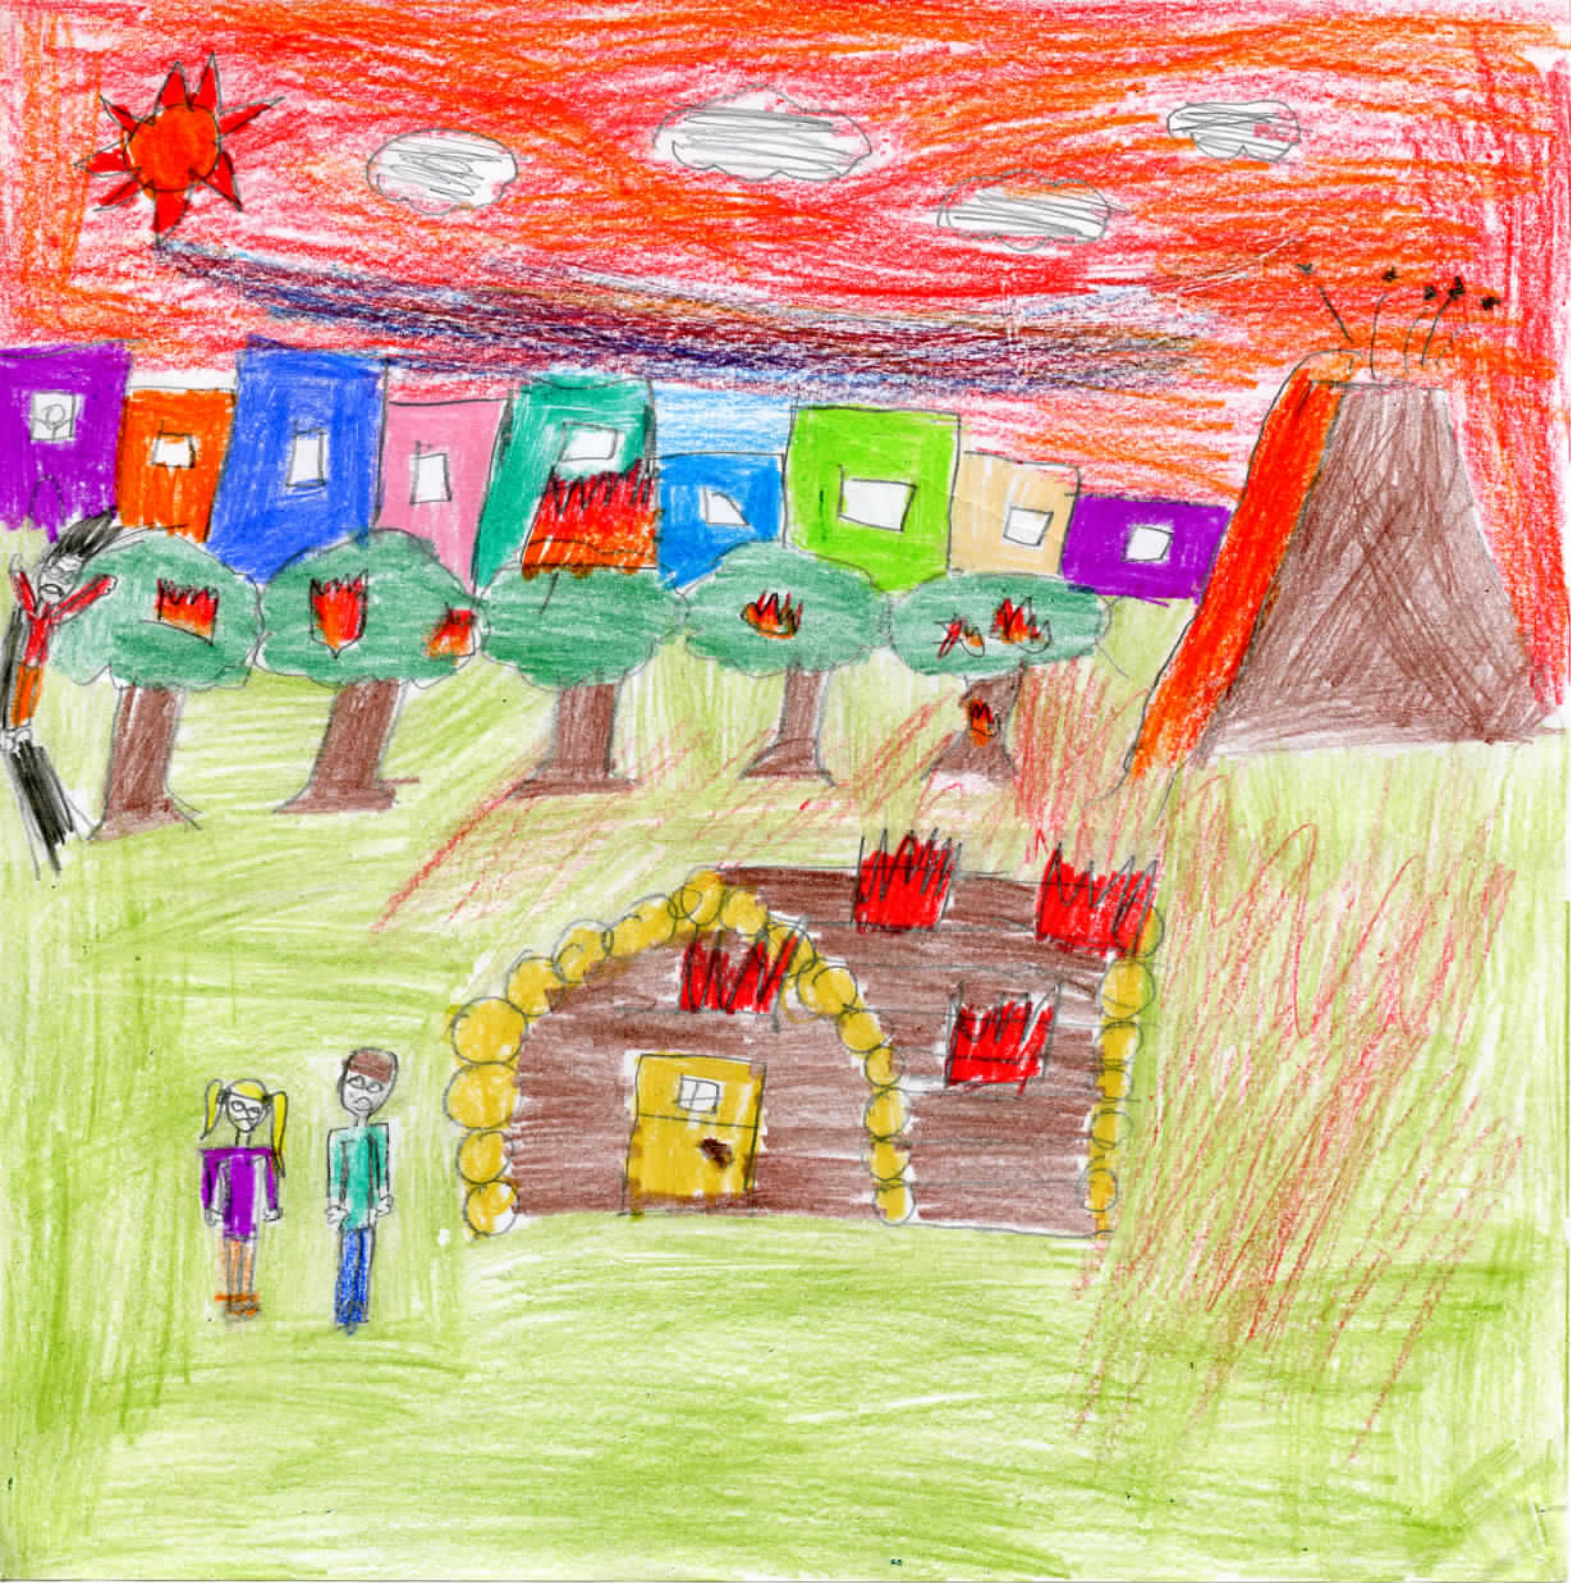

Vedono il vulcano e d'improvviso: BOOM! Il vulcano non si può trattenere esplose e de li uscì una sostanza calda, eronzione, che bruciano... LAVA! Gli alberi si infiammano e tutti gli abitanti delle città corsero de loro. (Onche le loro cose ve a fuoco e scappano di corsa)

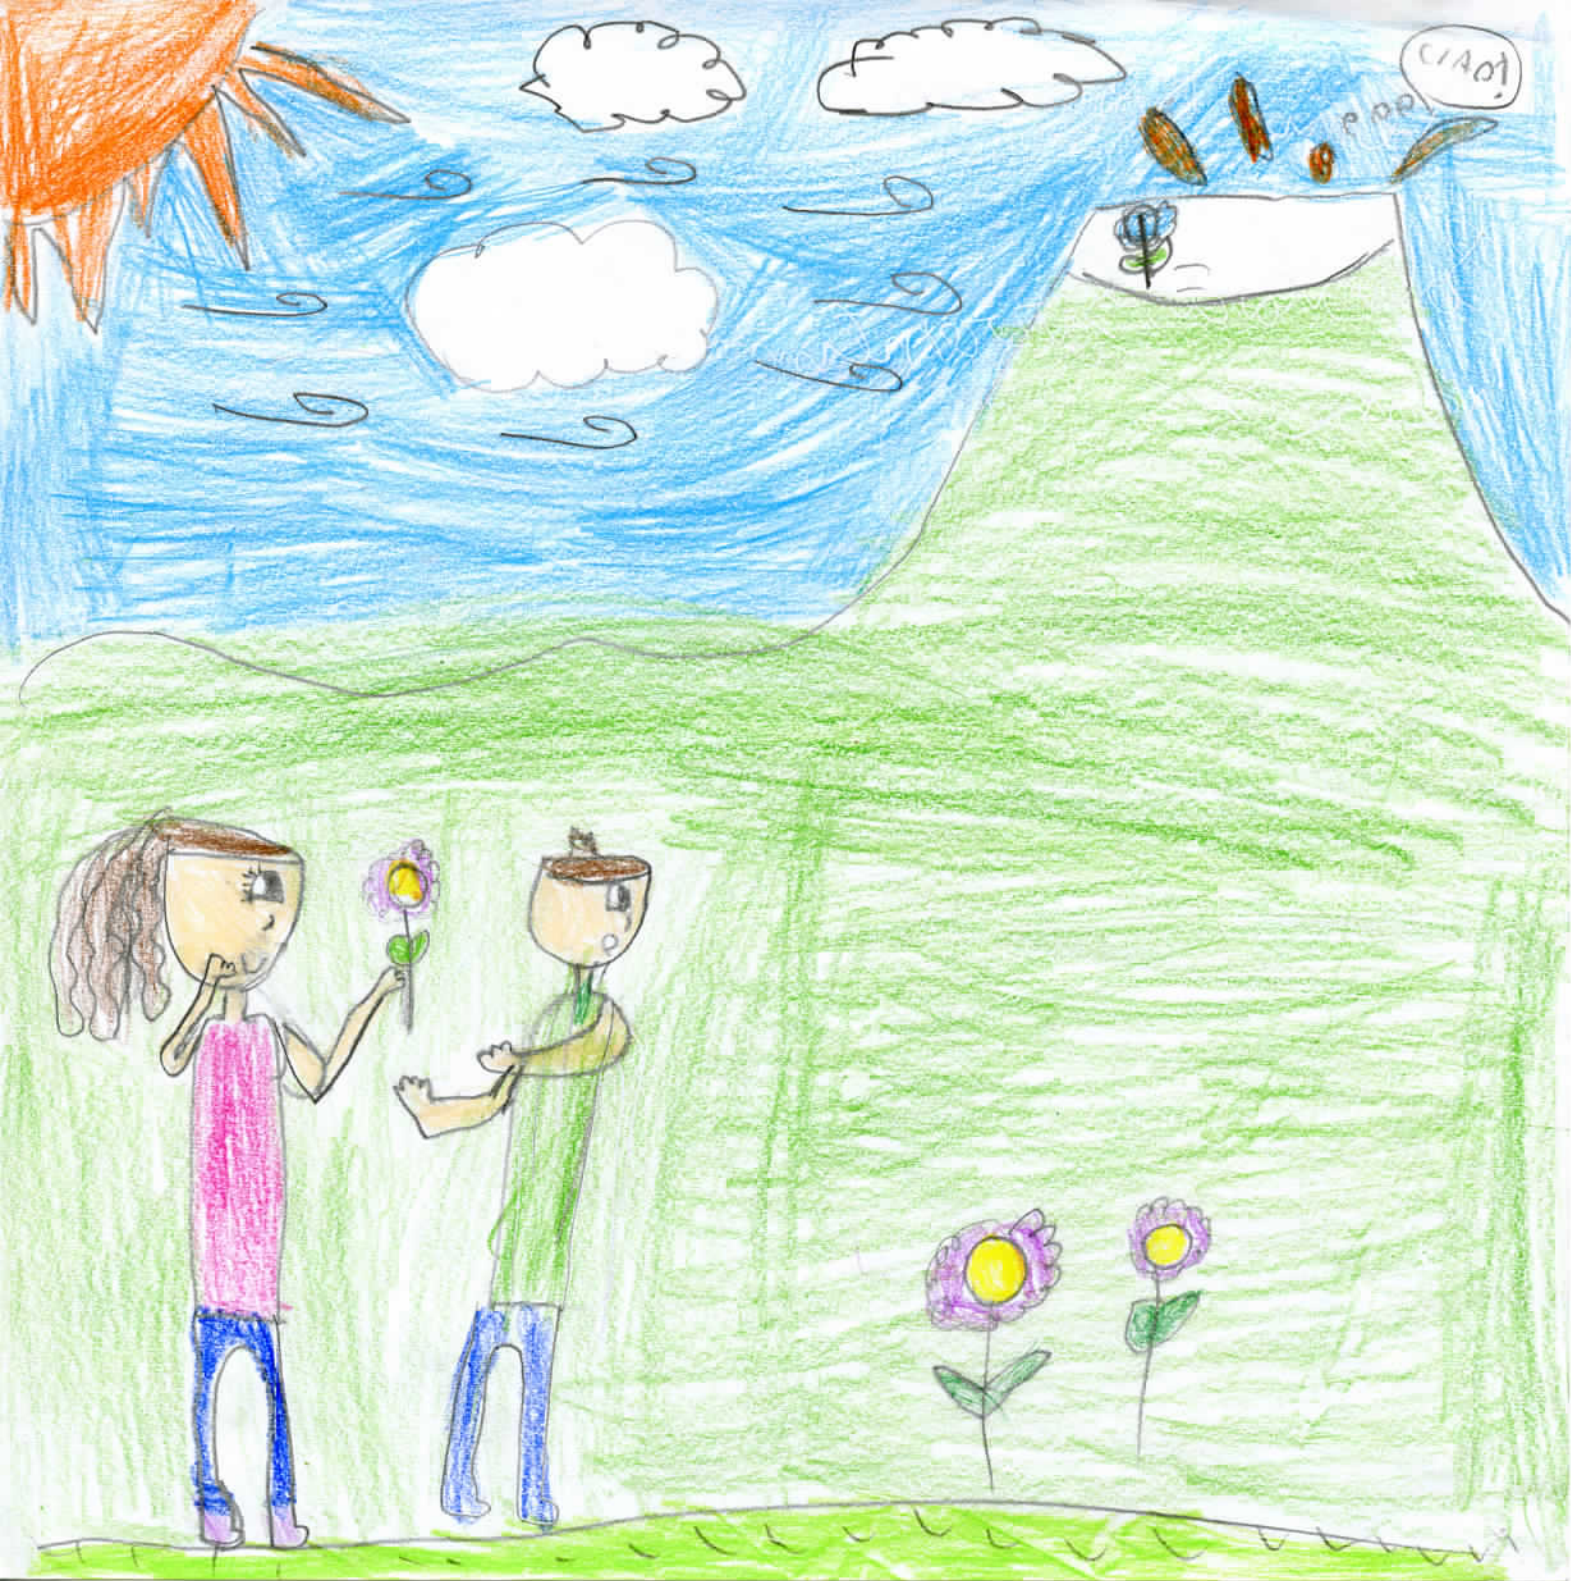

Il vulcano iniziò a cacciare un pó di lava e poi fiori, amma non vdeva piú scoppare perché ormai aveva capito che il vulcano era buono. Il vulcano iniziò a dire una parola: "Ciao" Frank a quel punto si spaventò e andò subito in casa.

Scena 3

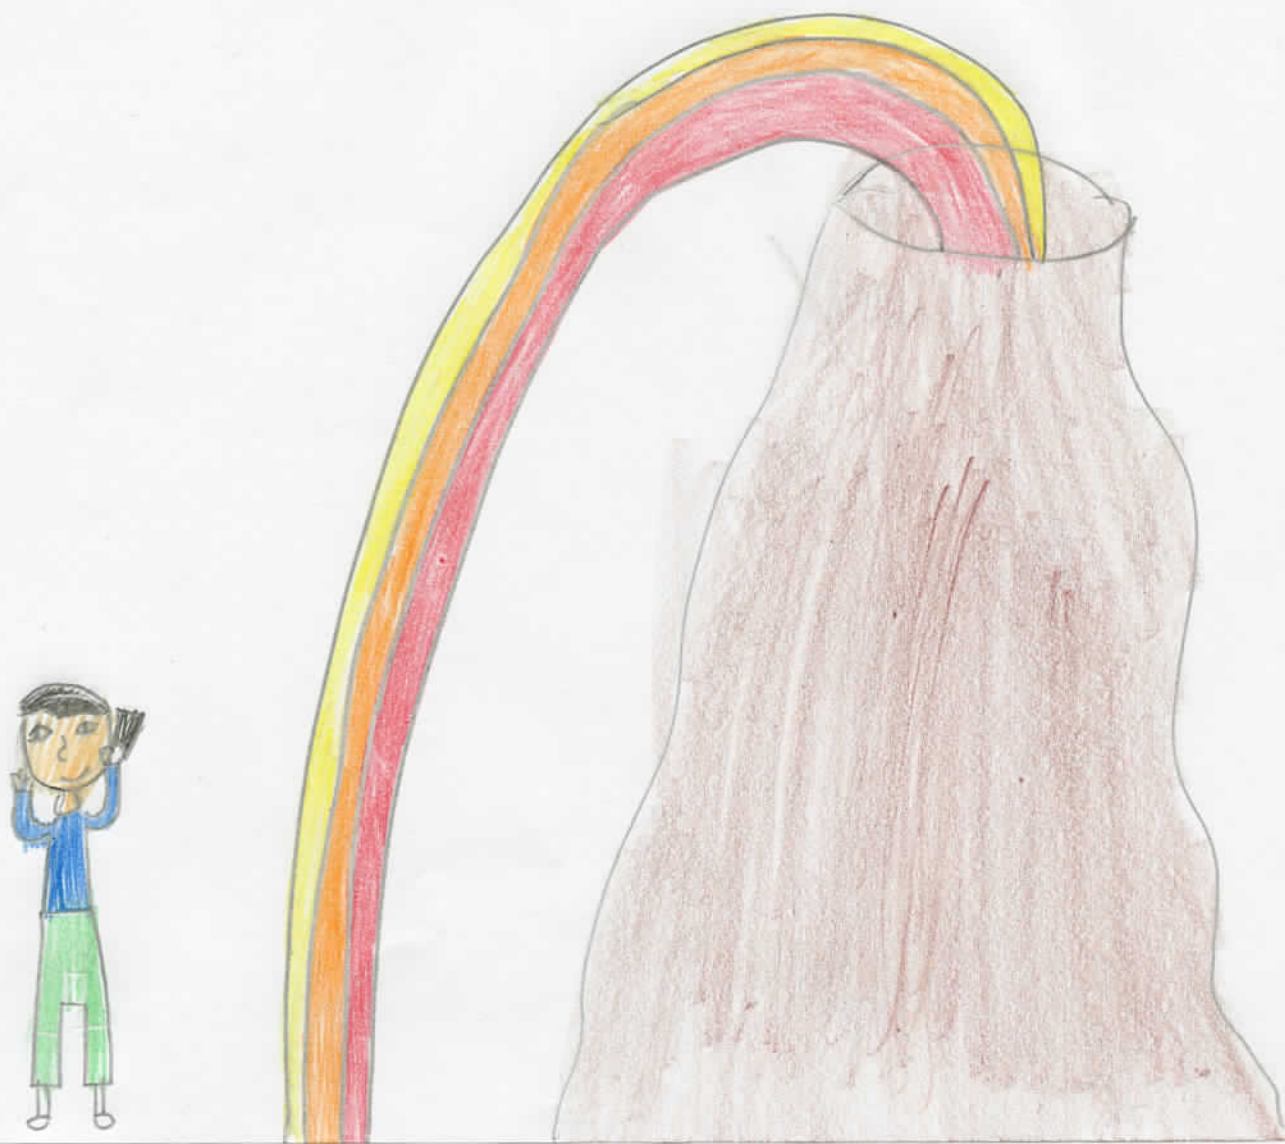

Scena 3

Il vulcano erutta e Harry nota qualcosa di strano perché la sua casa non si è ancora incendiata, ma dal vulcano escono degli arcobaleni ed Harry fa un video per mostrarlo al suo amico

Scene 3

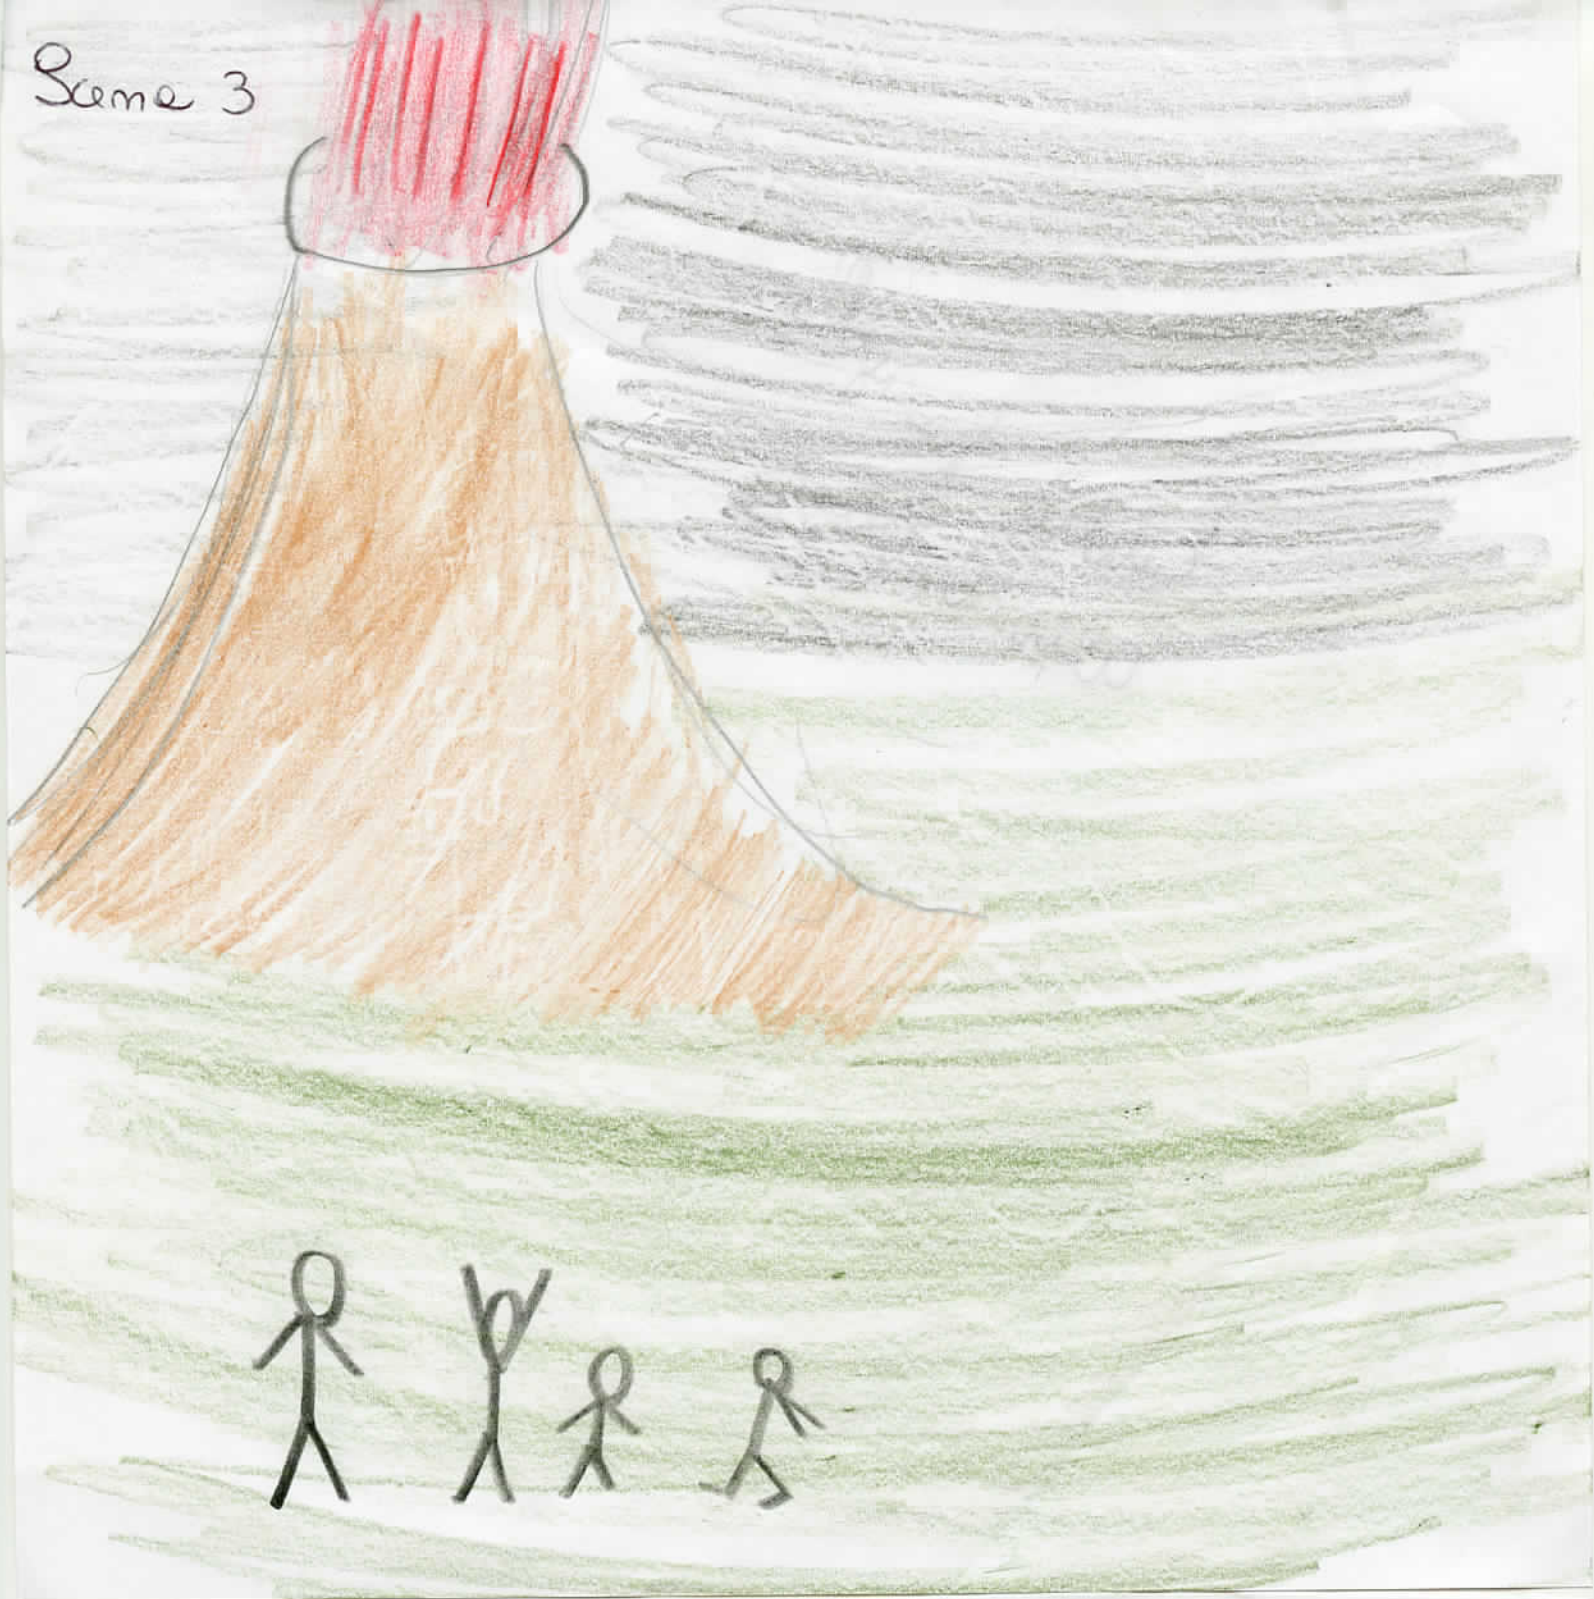

Scene 3  
All'improvviso il vulcano eruttò e tutti i cittadini si  
spaventarono e scapparono in un altro paese di  
nome Mussini.

Scene 3

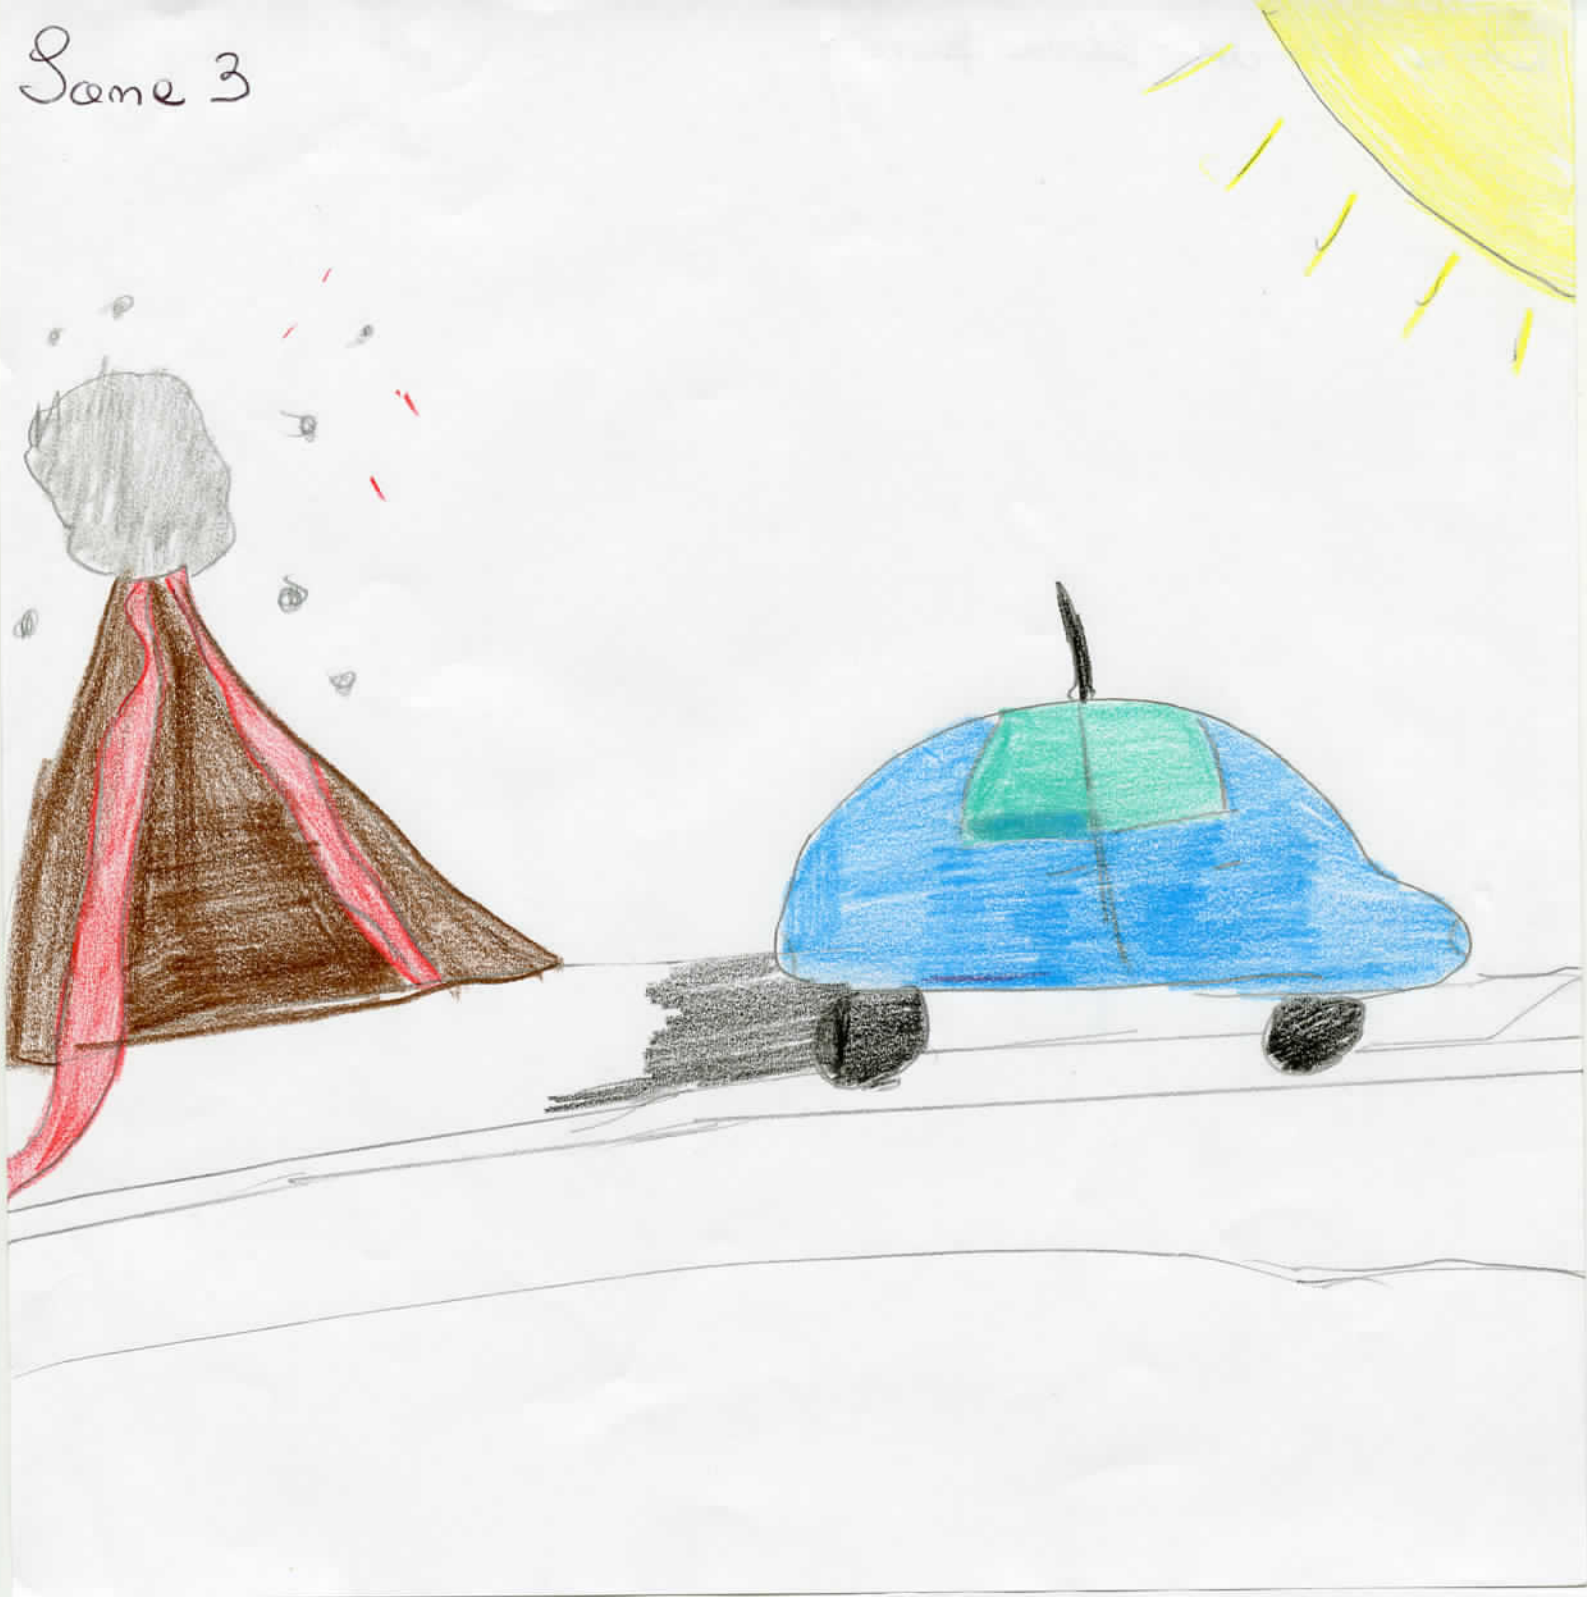

Scene 3

Luisa sente un brato improvviso e lo disse alla mamma. Allora Luisa e la mamma uscirono fuori per controllare. Videro il vulcano esplodere e si ripararono in macchina

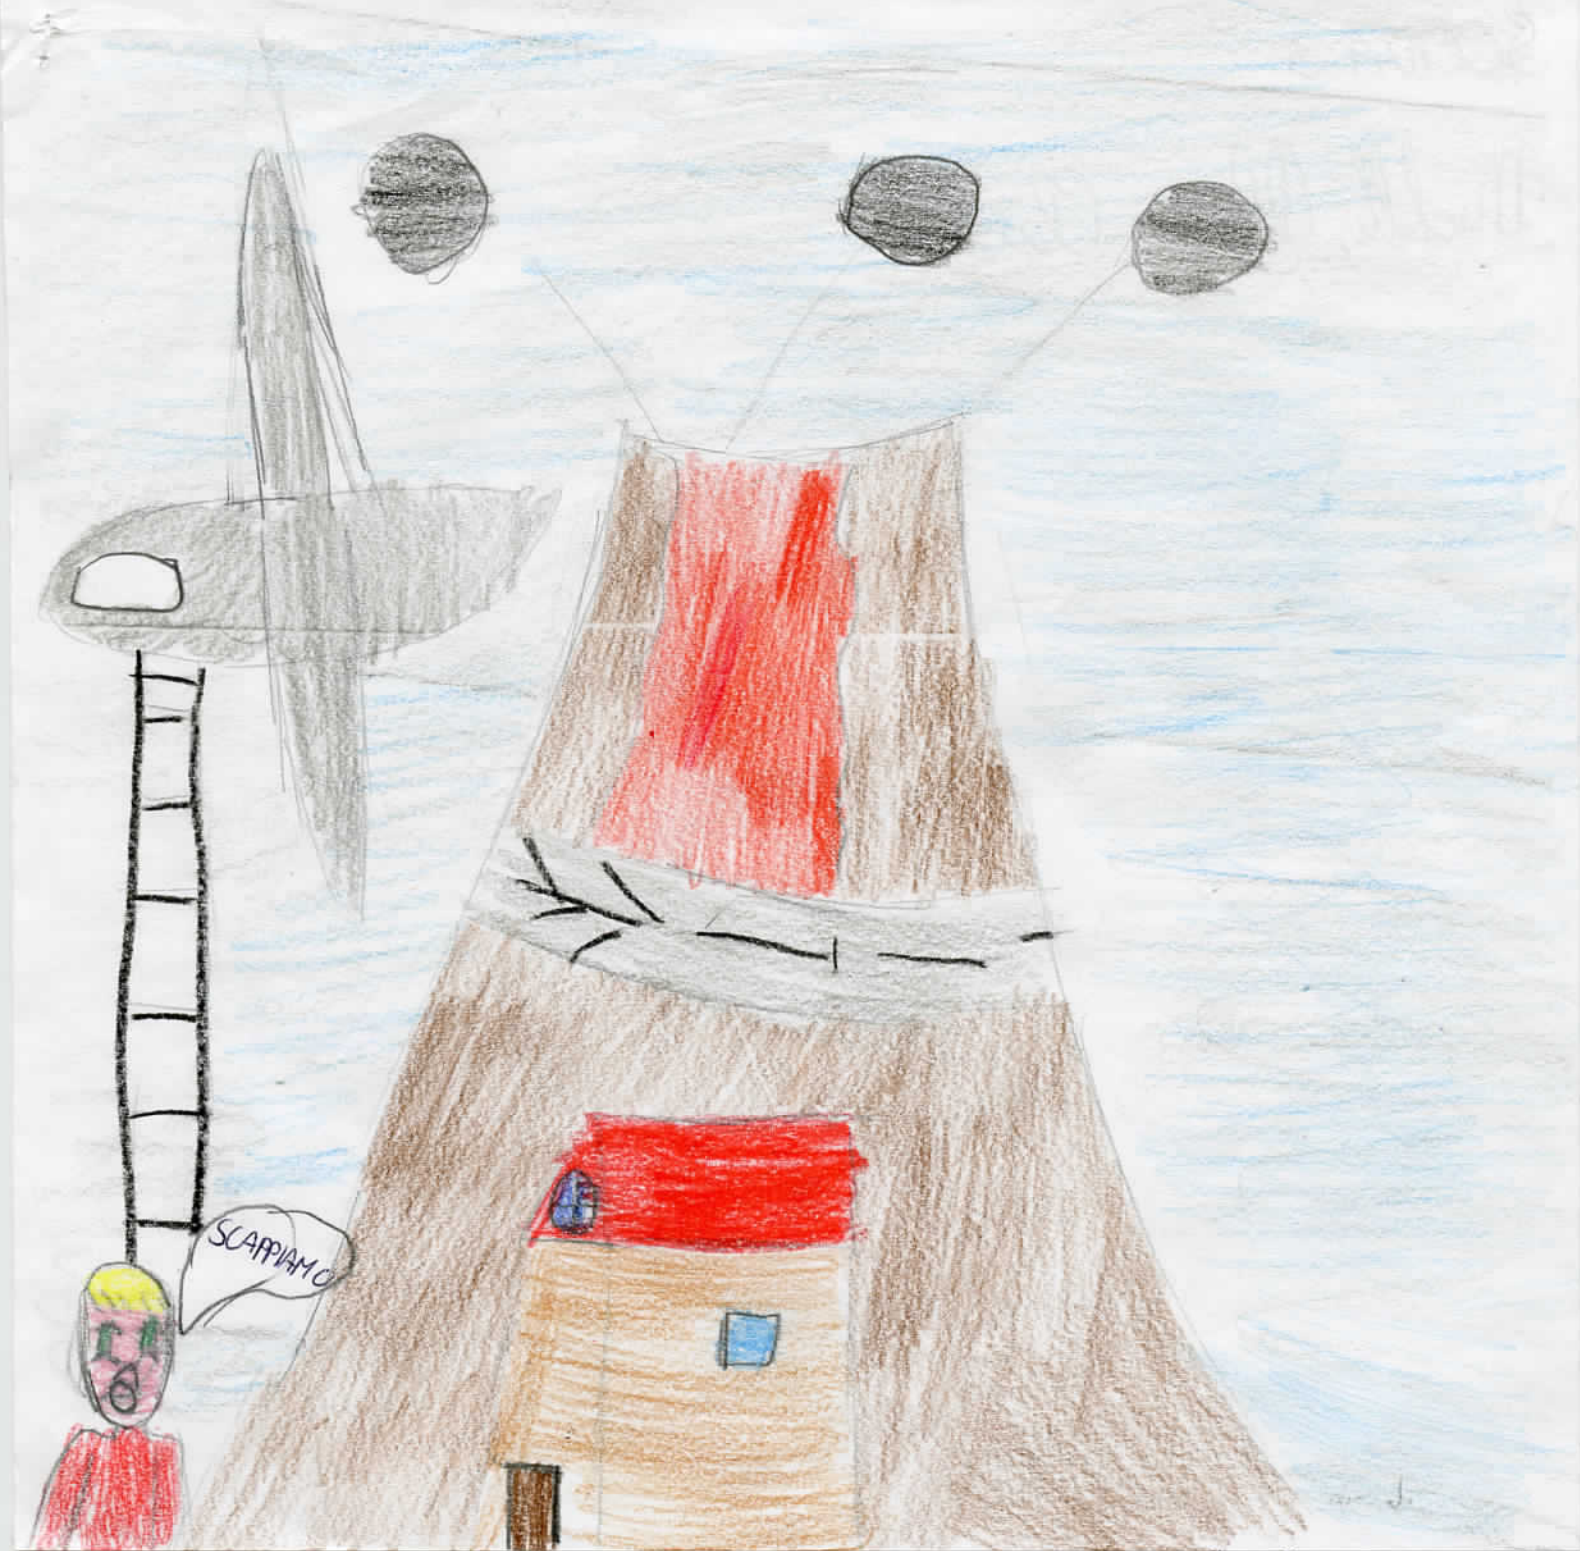

Ricordo di aver visto gli altri cittadini perché lo loro stava  
per raggiungere il paese, proprio in quel momento arriva  
un aereo per salvarli e tutti i cittadini.

SCENA 3

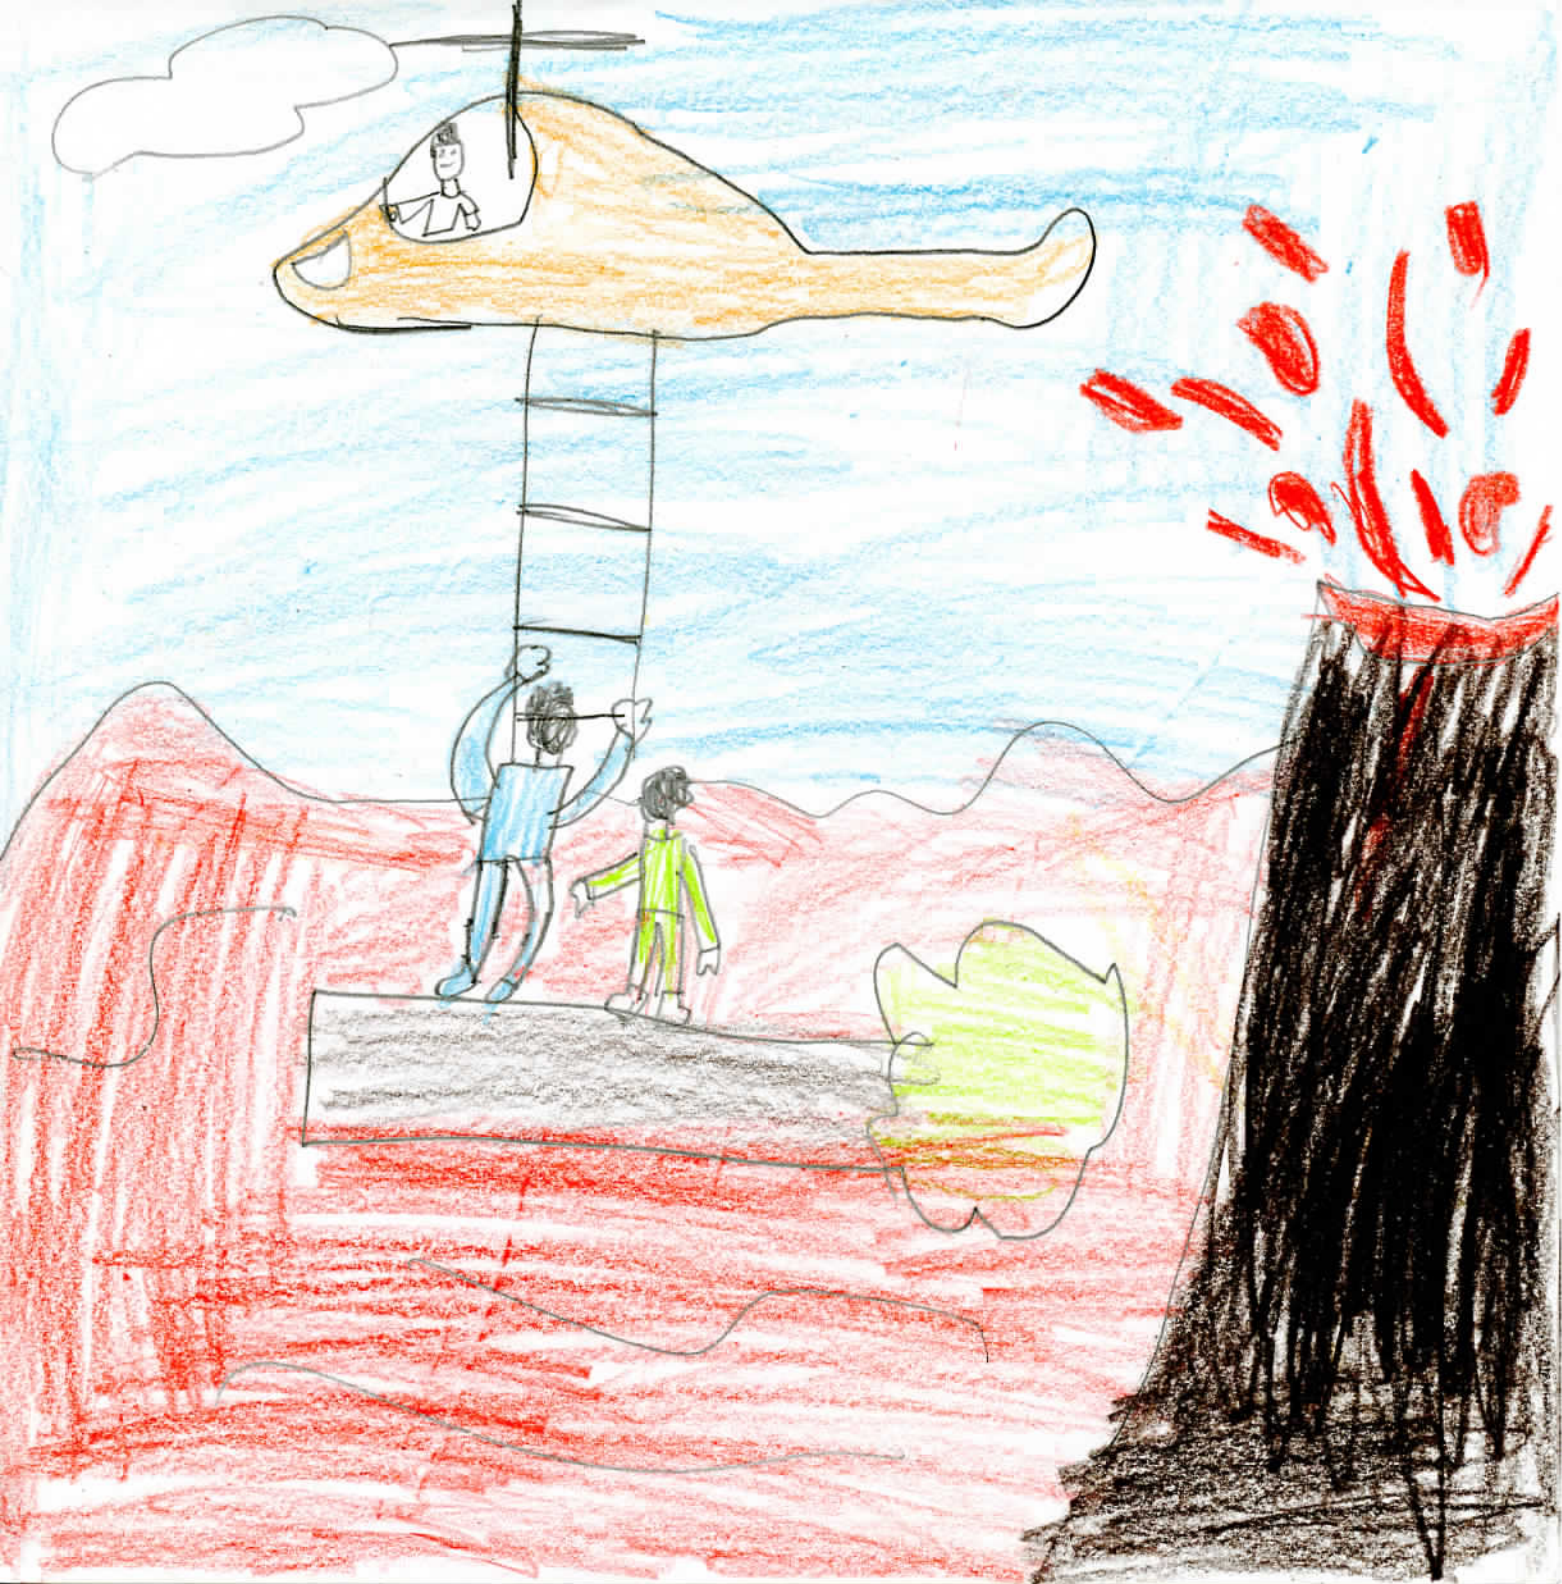

SCENA 3 FLAVIO JONATHAN  
FLUCA E JOMARAO VE PONO LA LAVADA PPERTUTO  
E DERA VICINO ALLA CITTA MA VENE  
UNALTRA PERSONA. A AIUTARU CO VN  
ELICOTERO.



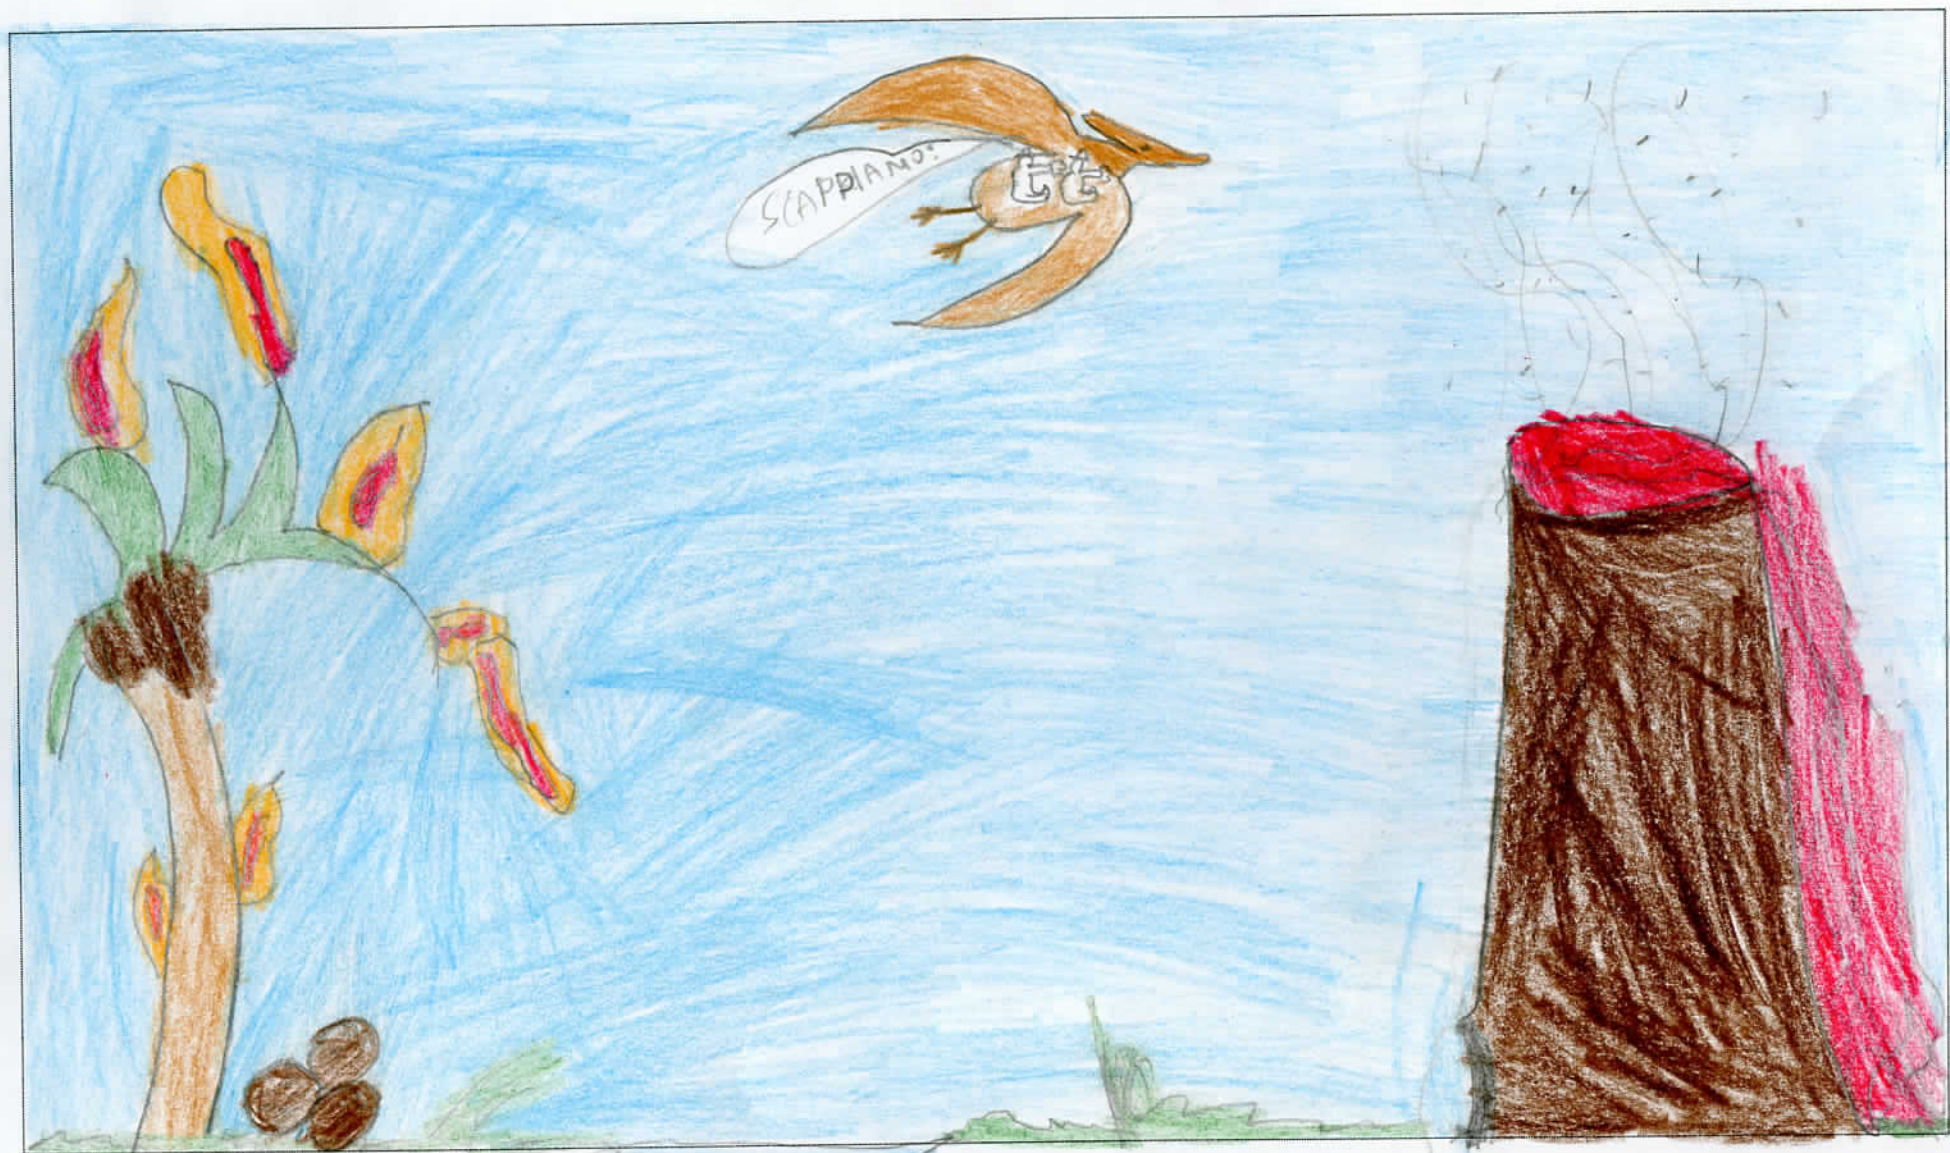

SCENA 3: L'eruzione - E APPENA IN TEMPO ARRIVARONO MOLTO IN ALTO  
PERCHÉ STAVA USCENDO TANTO IN FRETTA.

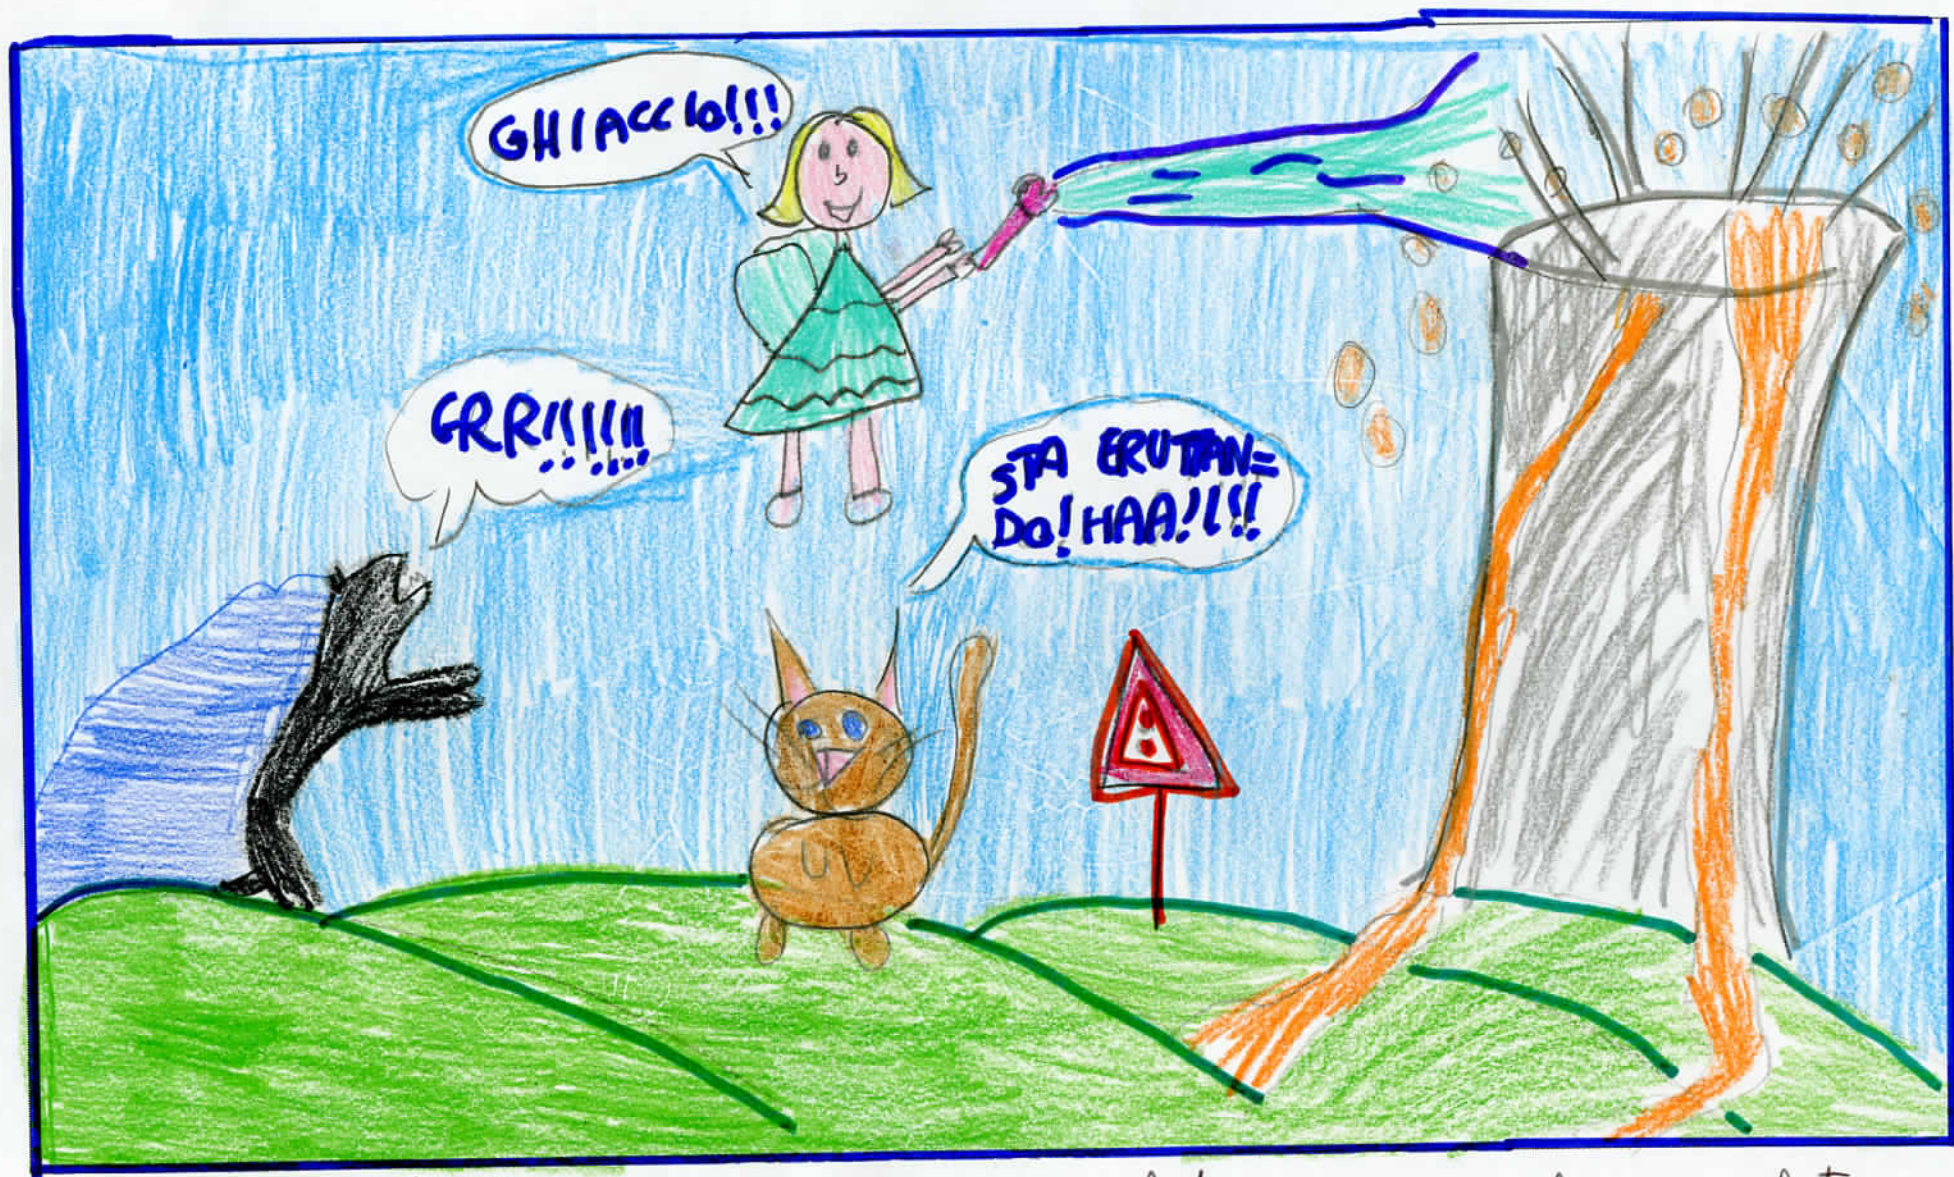

SCENA 3: L'eruzione - il vulcano erutta e fatina lo gela completamente.

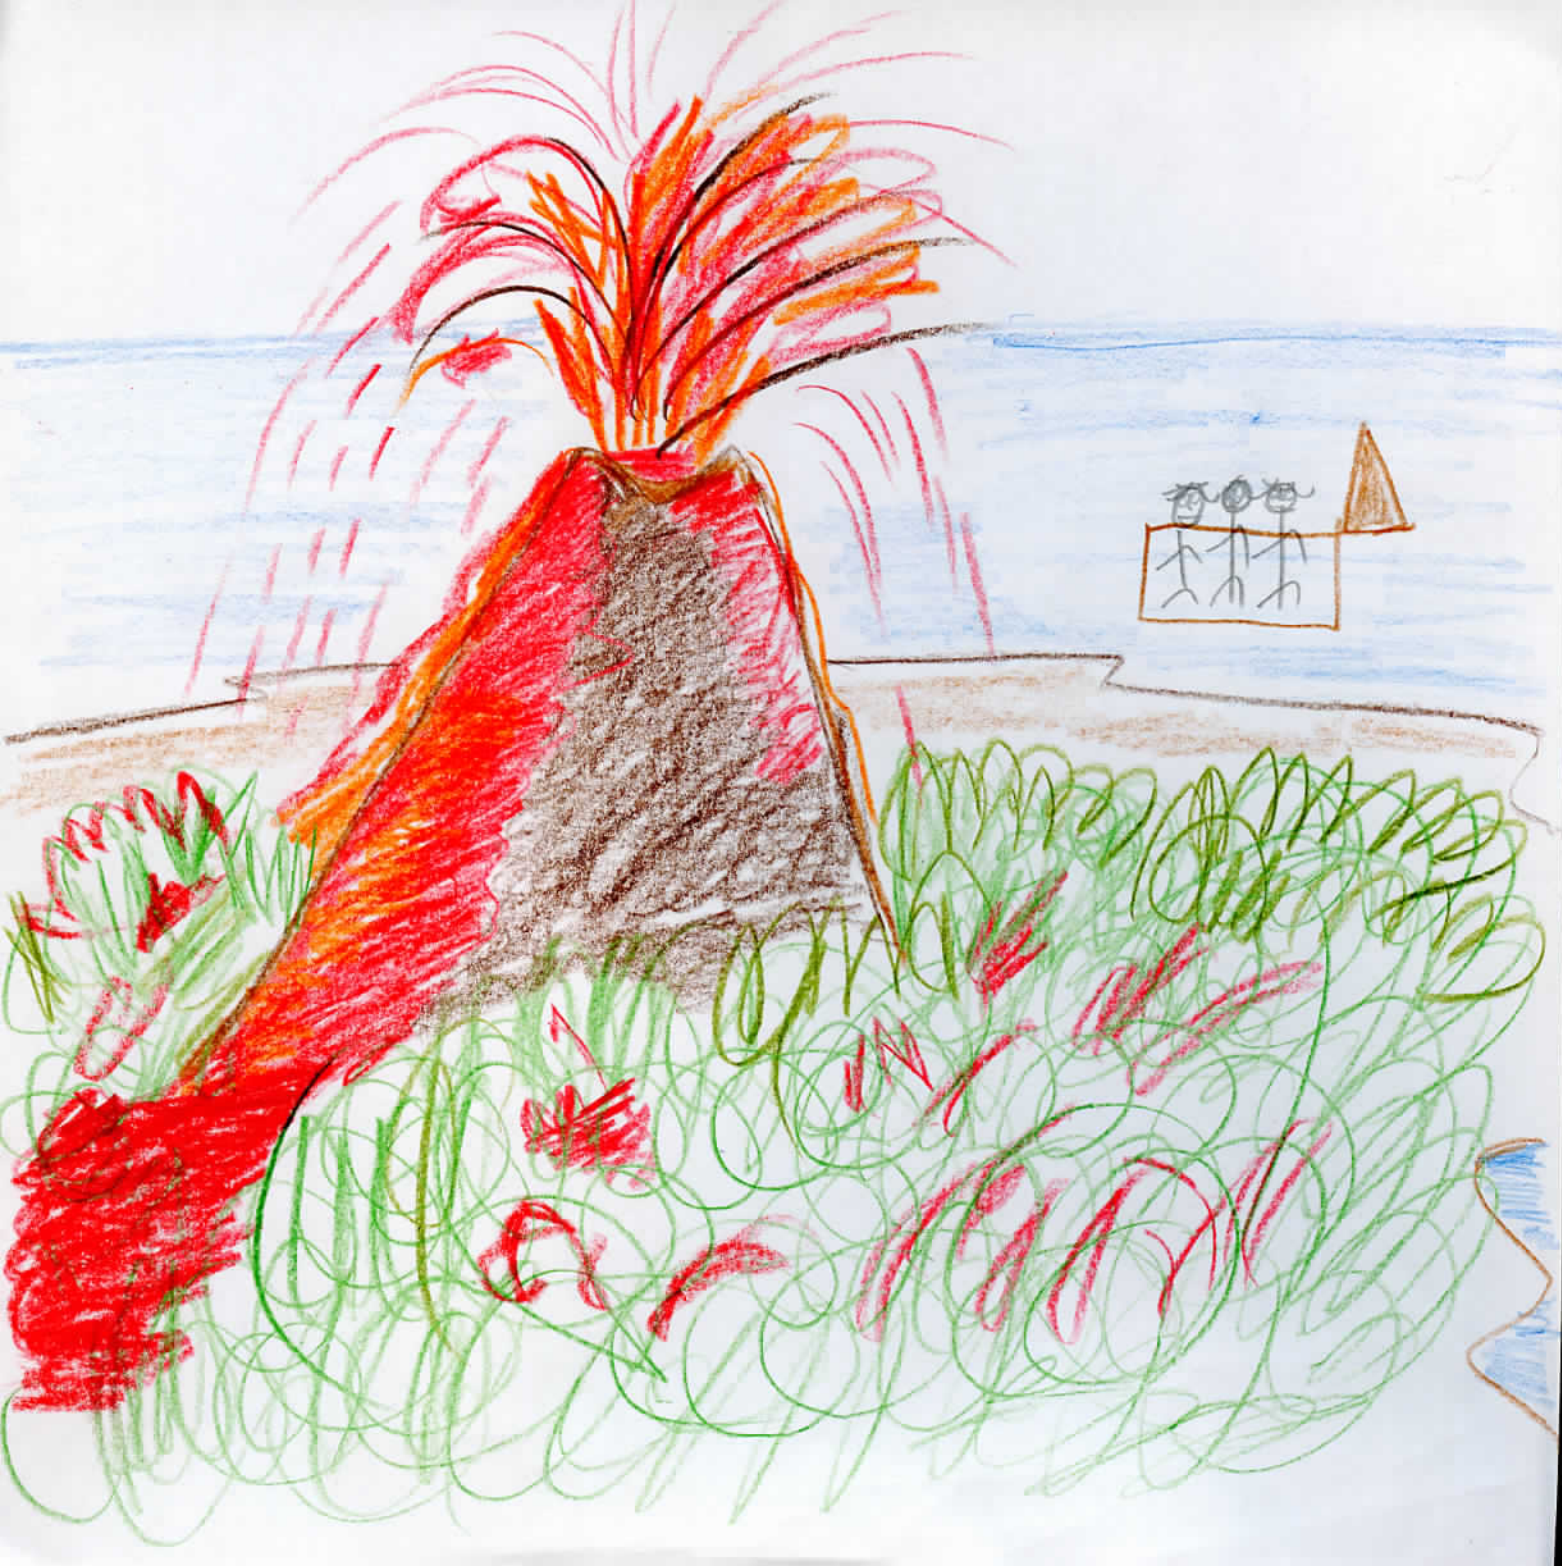

SCENA 3  
IMPROVVISAMENTE DAL VULCANO COMINCIA AD USCIRE UN GRANDE GETTO DI LAVIA. E I RAGAZZI SCAPPANO DALL' <sup>BOSCO</sup> <sup>LA</sup> <sup>CERCA</sup> UN MEZZO DI TRASPORTO PER FUGGIRE DALL' ISOLA. TROVANO UNA BARCA ABBANDONATA. CI SALGONO SOPRA E RIESCONO A FUGGIRE DALL' ISOLA.

## **Supplement 5 - Frame 4 – The epilogue**

Selected examples of the stories' fourth frame, describing the conclusion.

Drawings were realized by the pupils of primary and secondary schools listed in Table 1. The schools' enrolment into the project was discussed by schools' board and then presented to the families at the beginning of the school year, as a part of the school curriculum (Piano Triennale di Offerta Formativa). We did not collect any personal information about the participating students who always worked in pairs or small groups. Students were explicitly asked not to print their full names on their compositions. The production of text and drawings was not compulsory and students were free to decide the degree of their involvement in the exercise. The stories we collected were freely donated to be used for research purposes such as the present manuscript. Originals are kept into the Edurisk archives.

The supplement is provided as a portfolio, with examples of the collected materials.

3

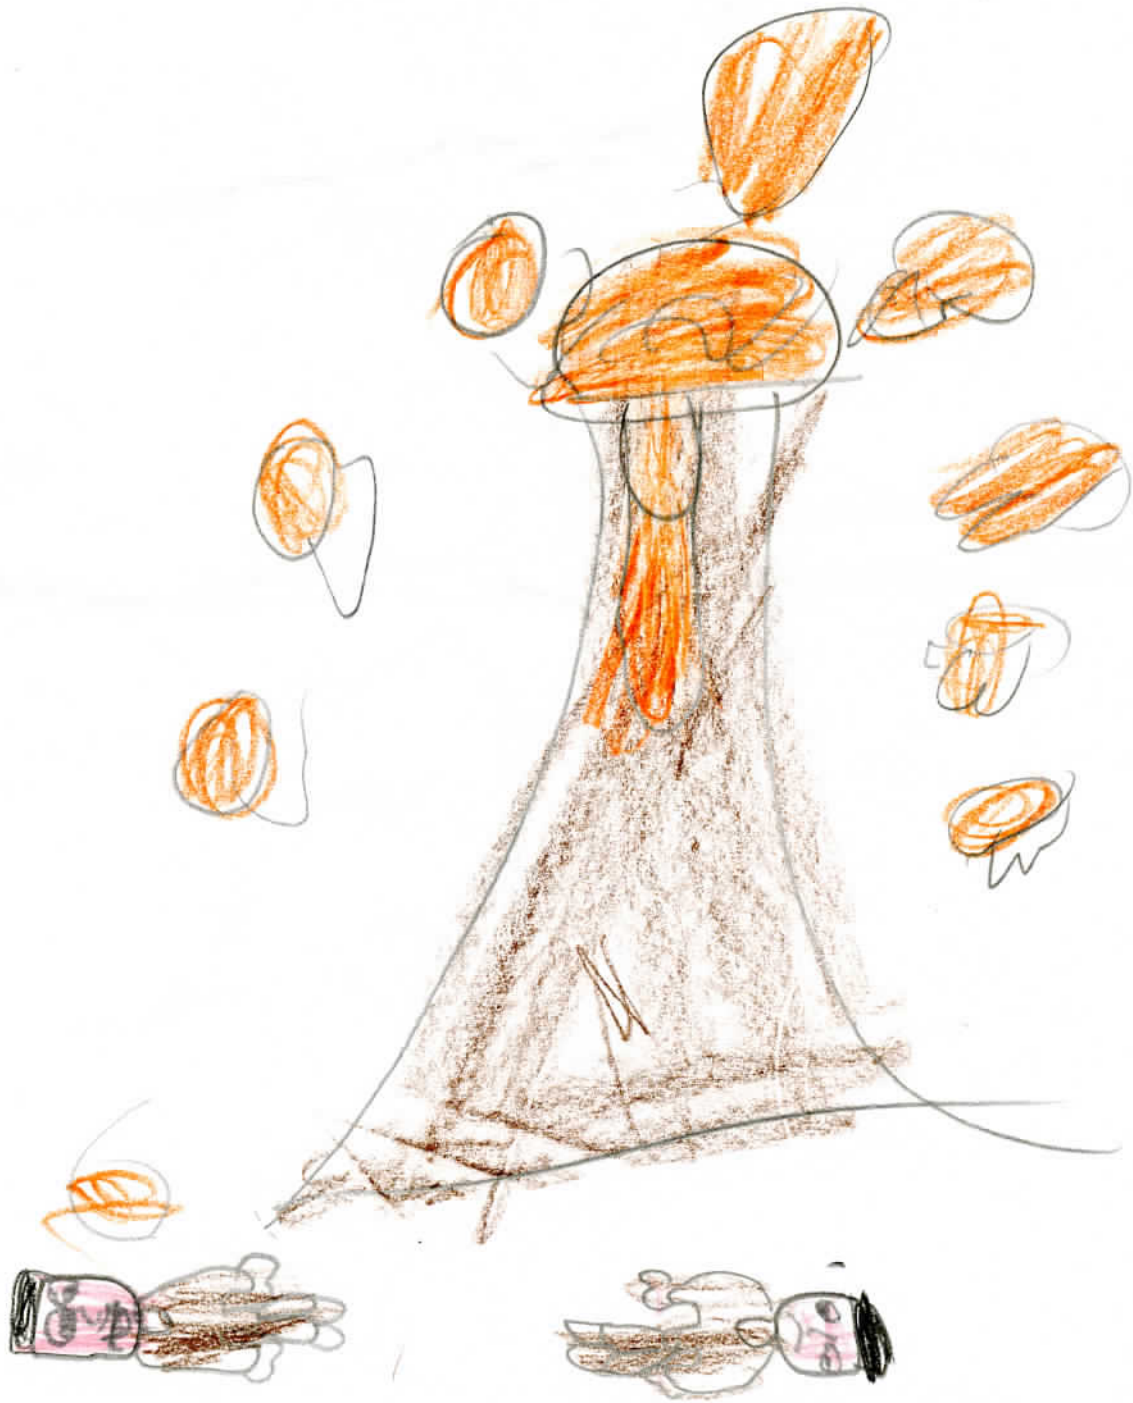

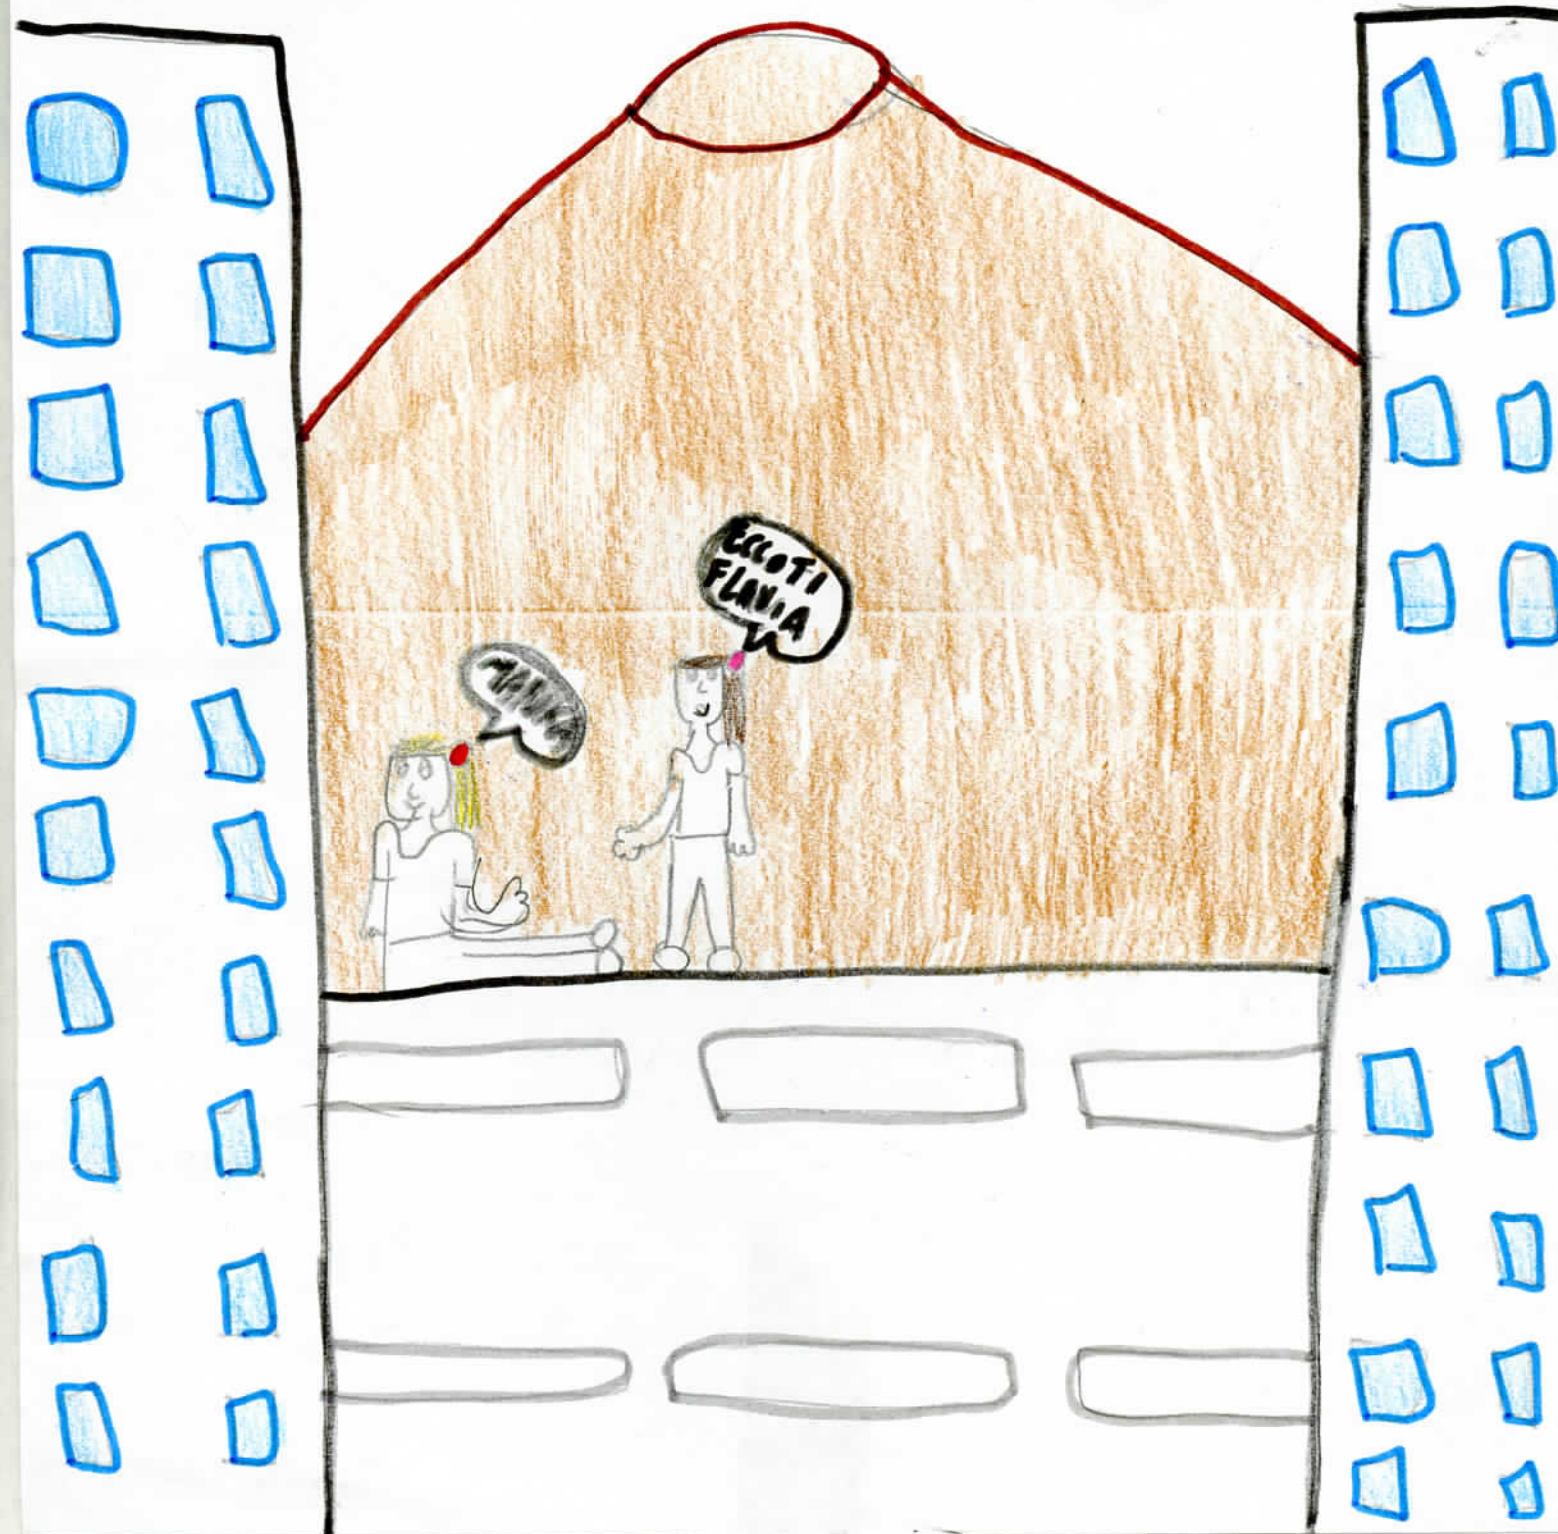

Il ritorno di Flavia

Mi sono girata e ho visto che Flavia non c'era, sono andata in tanti  
 posti la casa era tanto e c'erano in grosse quantità. Non  
 Flavia si era alzata e non pino andata al numero superiore a  
 quartieri sfognati. Lei sono andate a cercare ed era in un  
 Lo ho preso in braccio e l'ho portata con me. Sono venuti i soccorsi  
 a quartieri, dopo che era il vesuvio ha smesso di buttare e  
 perfettamente siamo tutti sani e salvi.

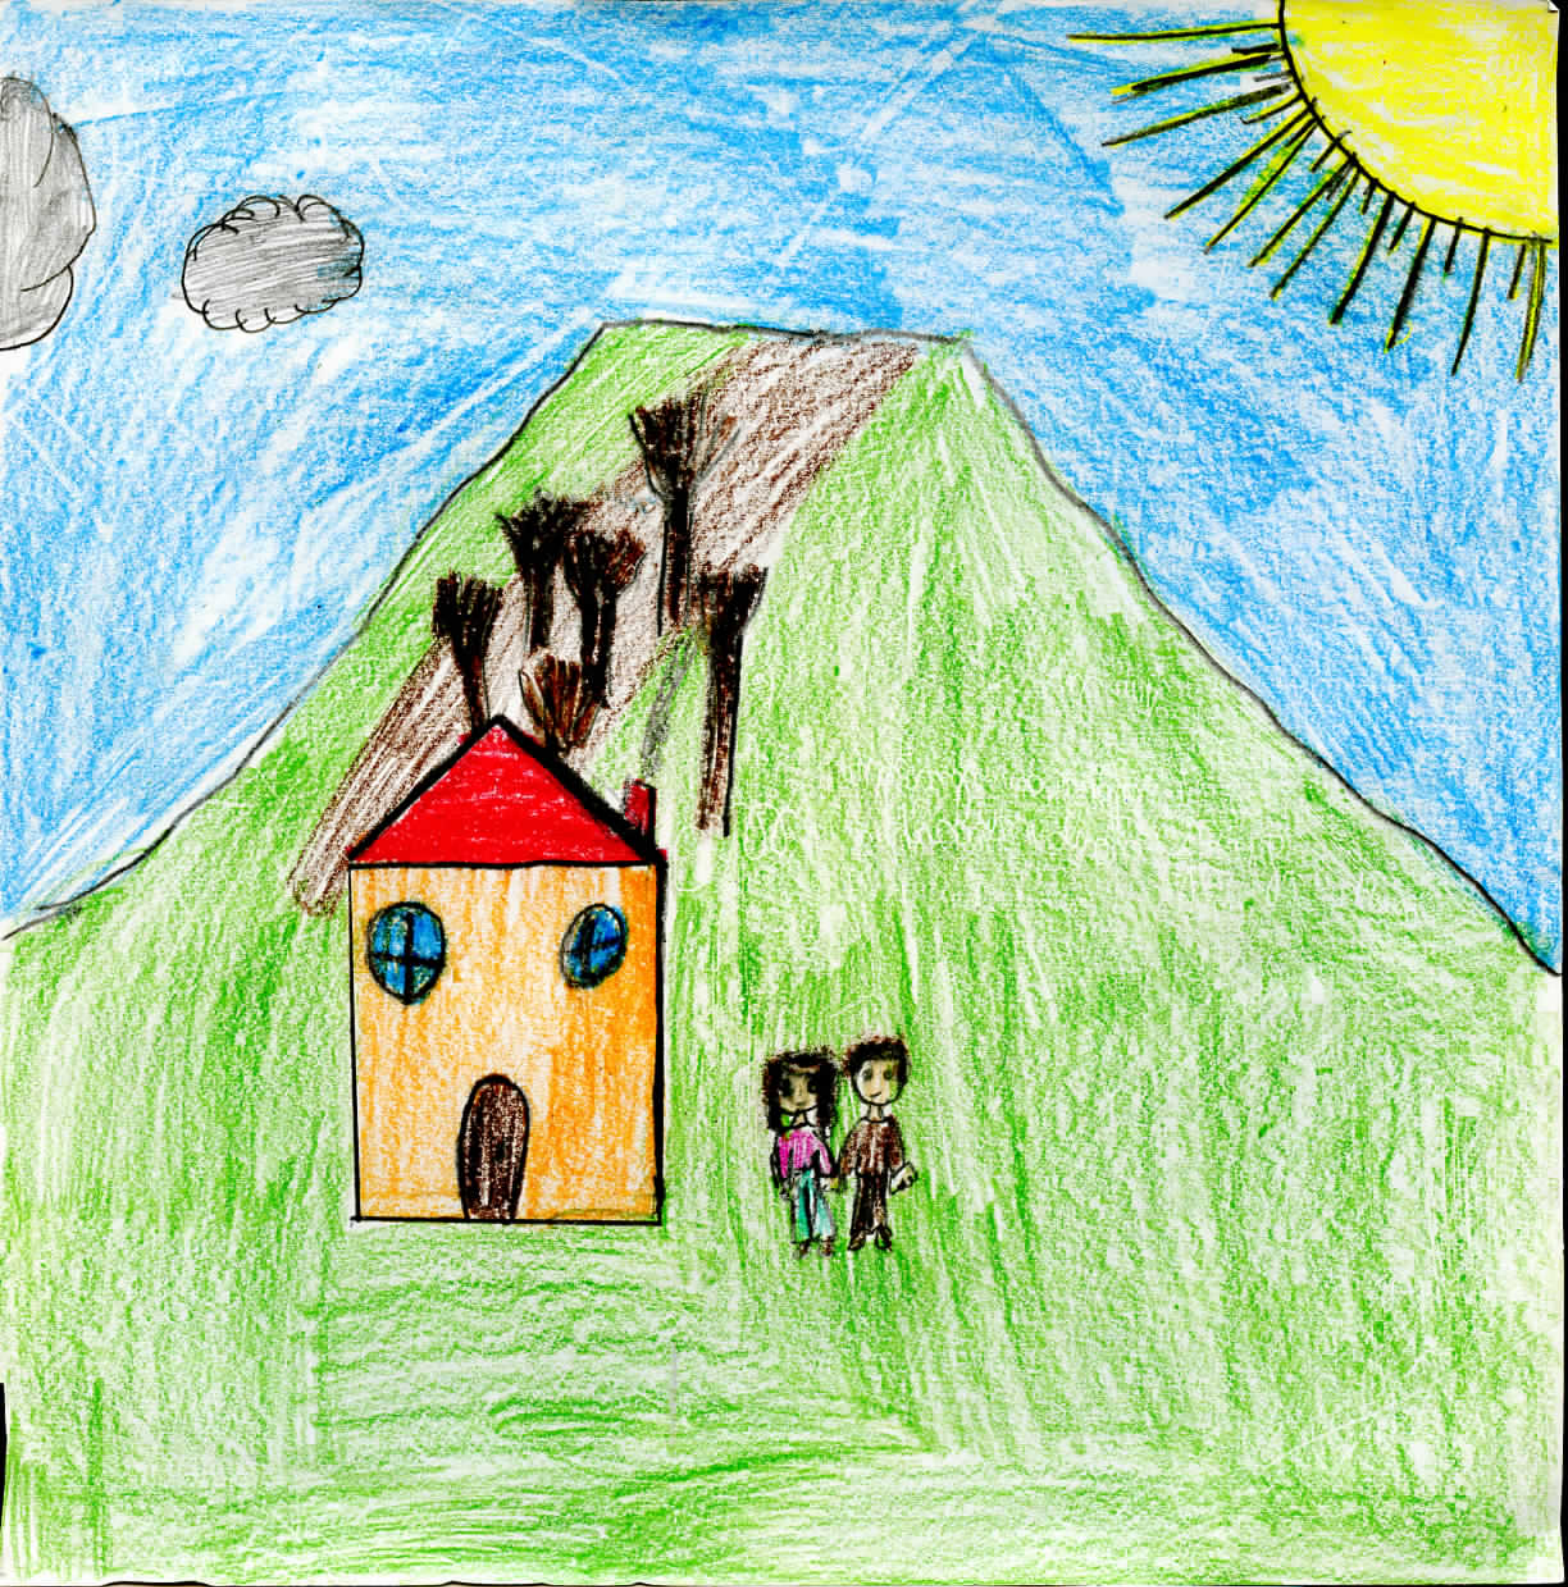

L'eruzione finì il mugnaio e sua moglie tornarono <sup>o così</sup> ~~alla~~ ~~vissuta~~  
tutti felici e contenti.

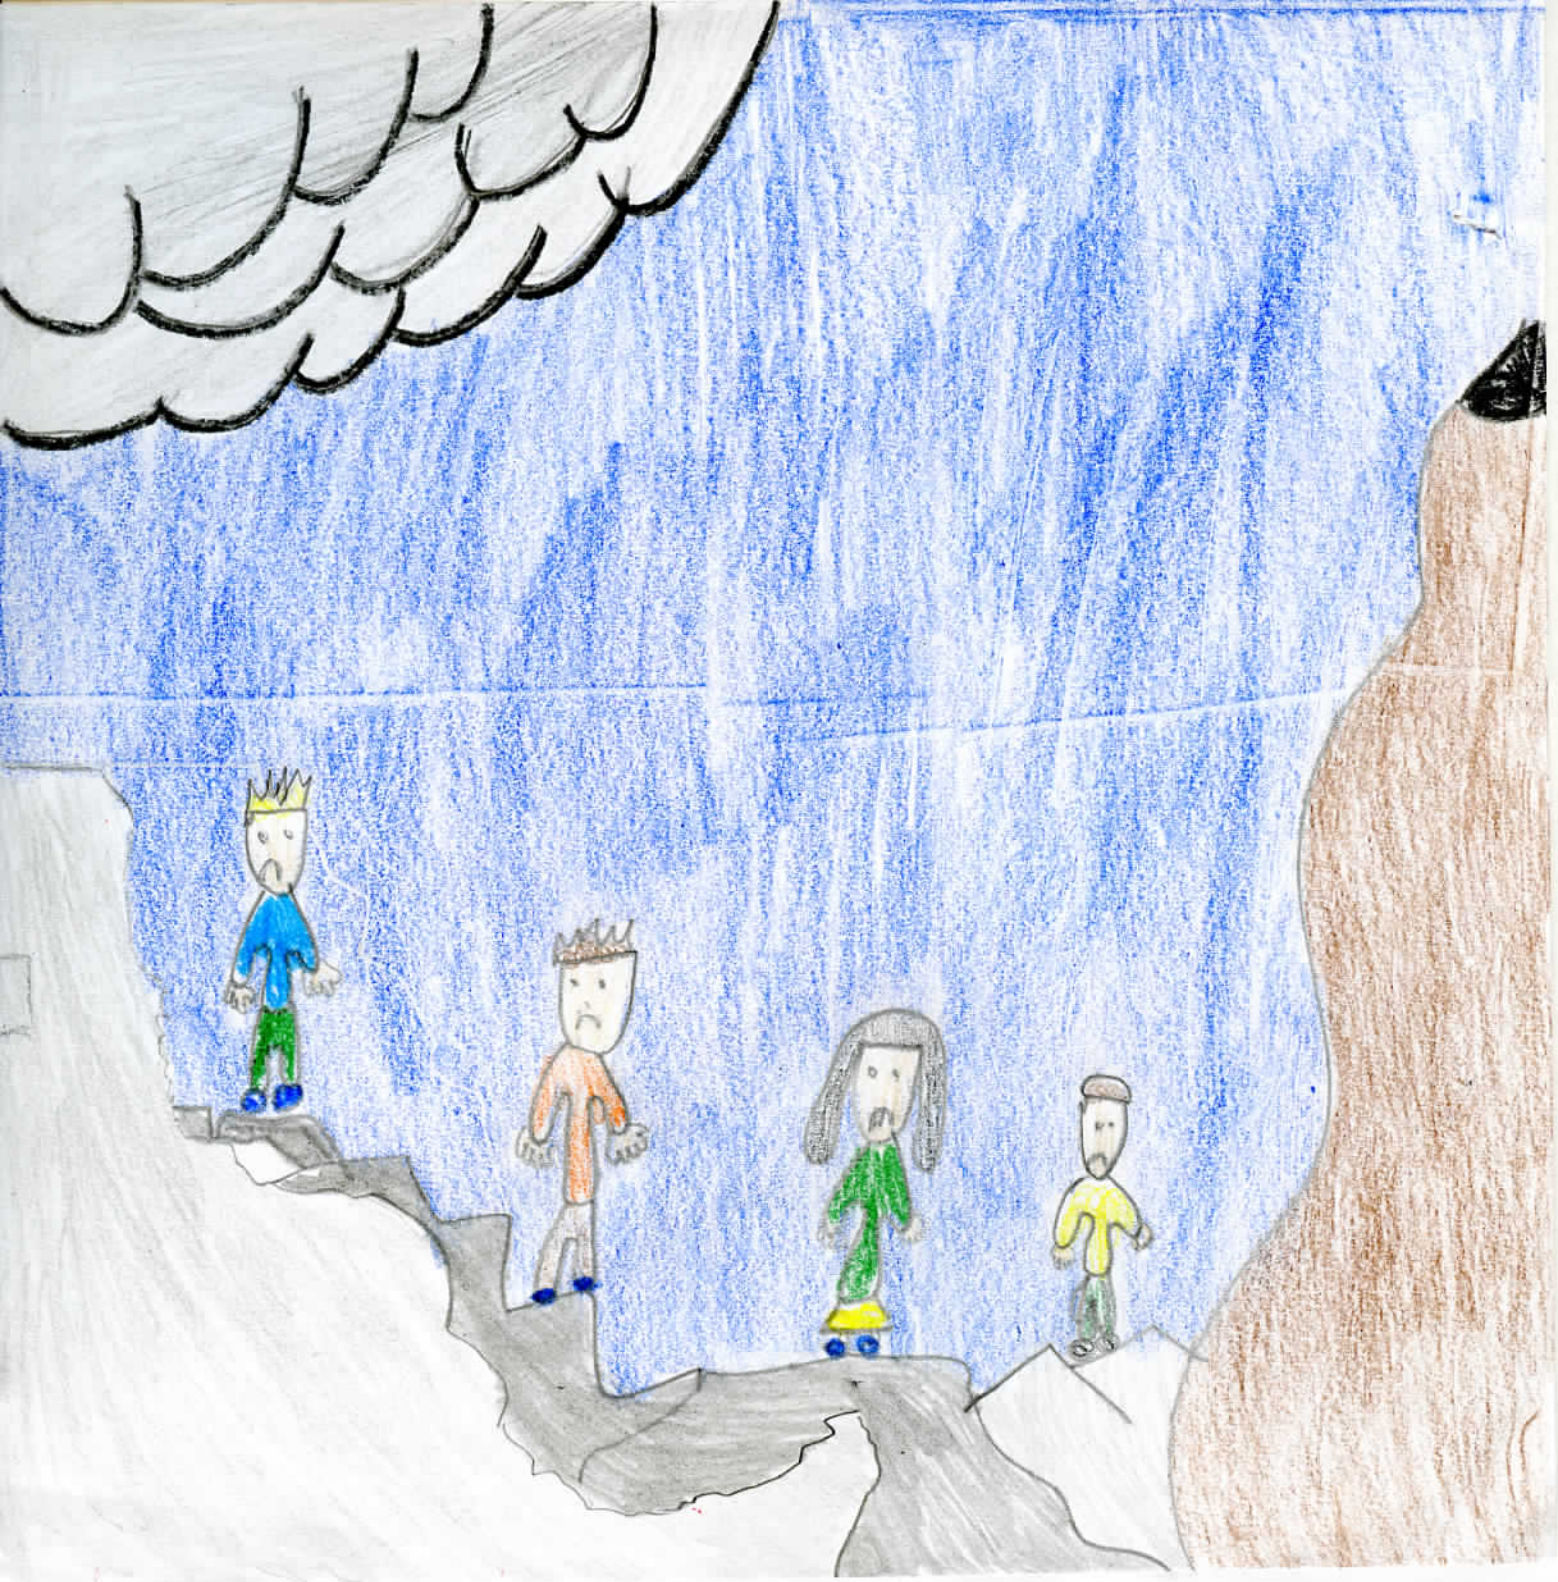

Quando il vesuvio mise dirottore, tutte le case erano distrutte  
e la mamma e il papà aiutarono la città per ricostruire le case



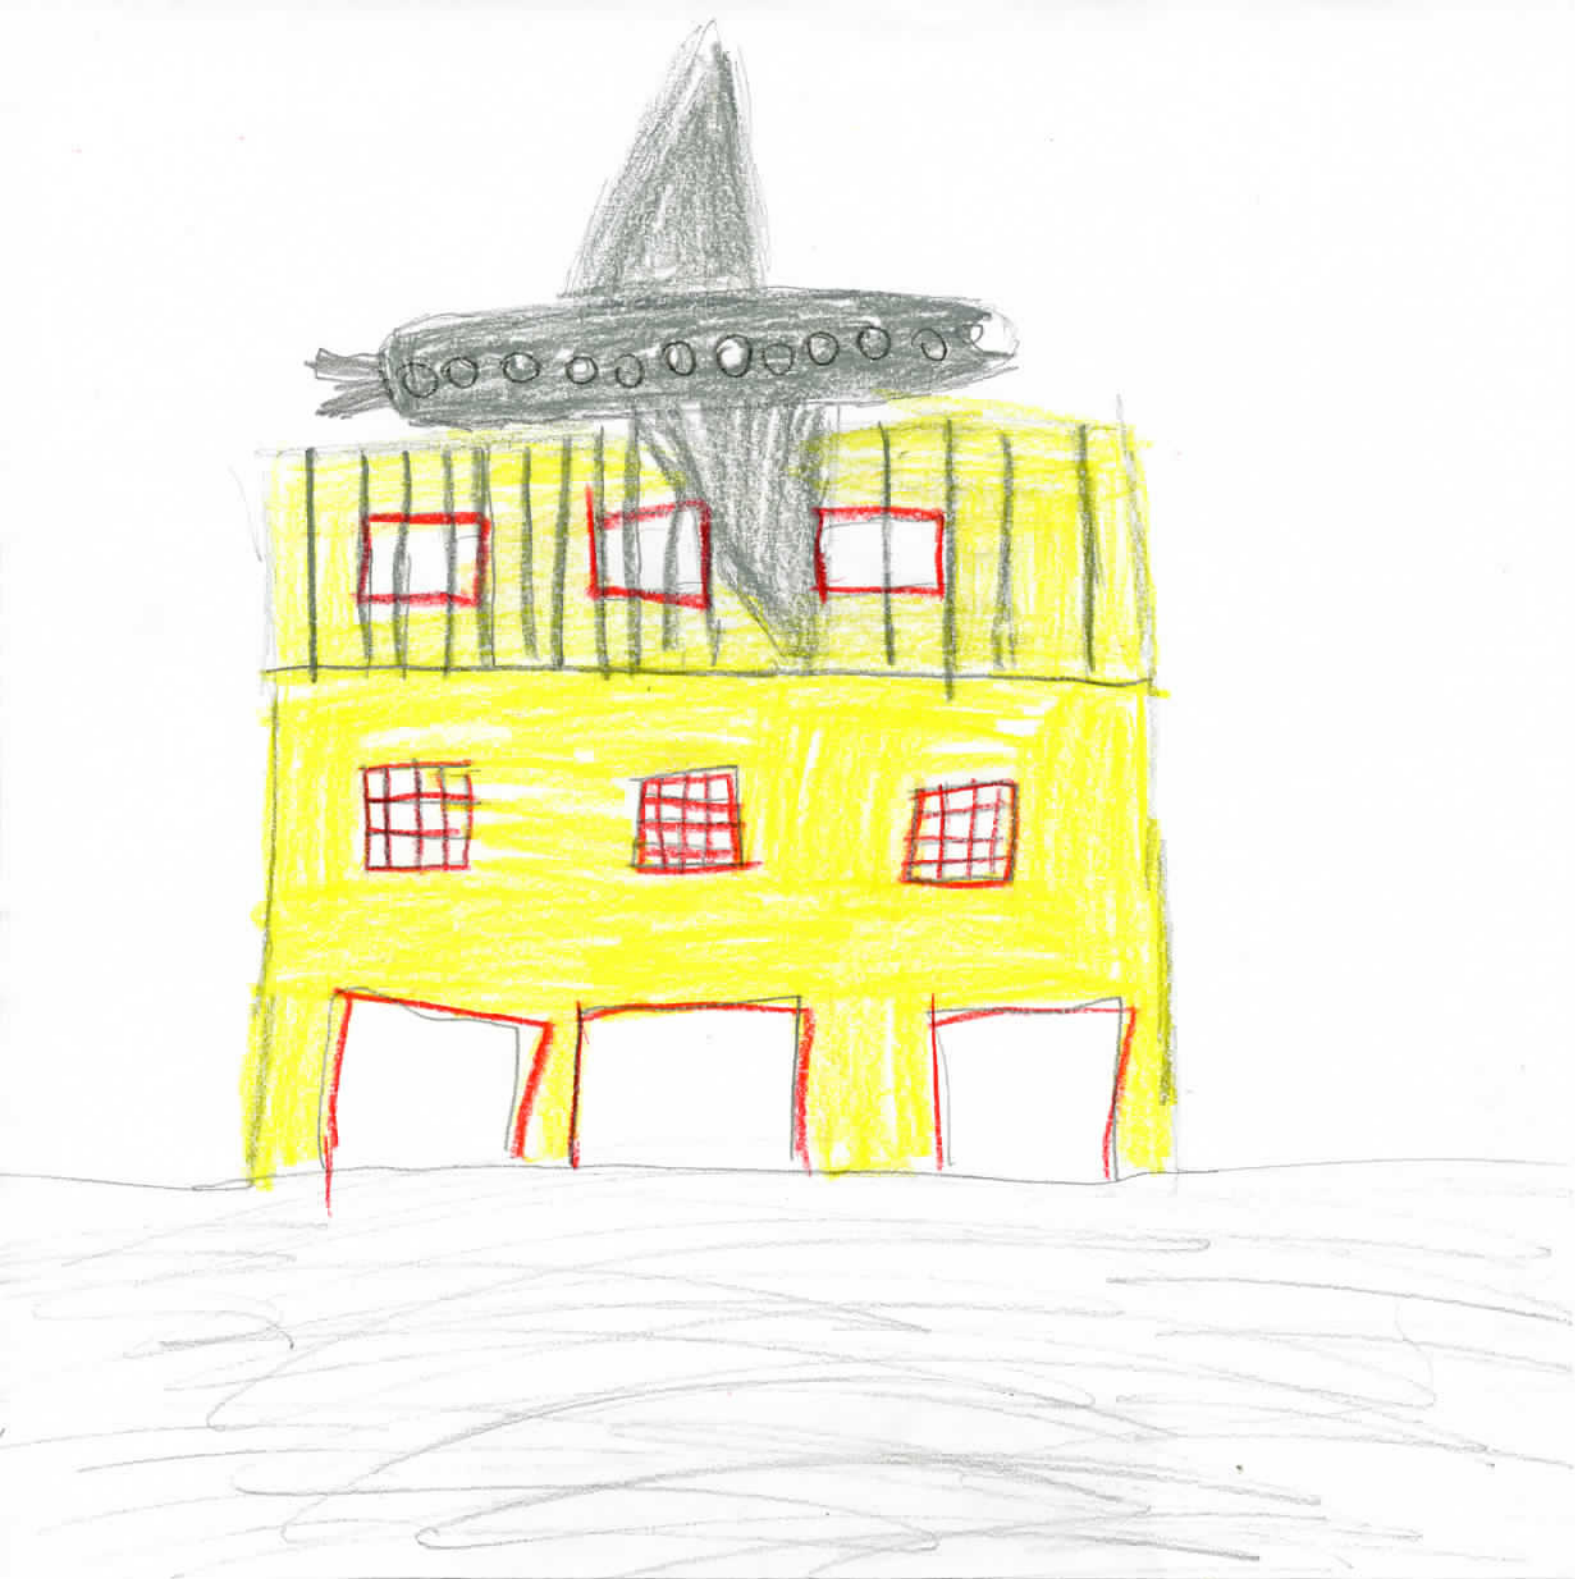

Dopo un po' arriva un aereo e si appoggia sul tetto della scuola.  
Tutti gli alieni si salirono, i genitori sono già lì, alcuni, andarono in un altro paese  
lontano dai vulcani.

scena m<sup>4</sup>

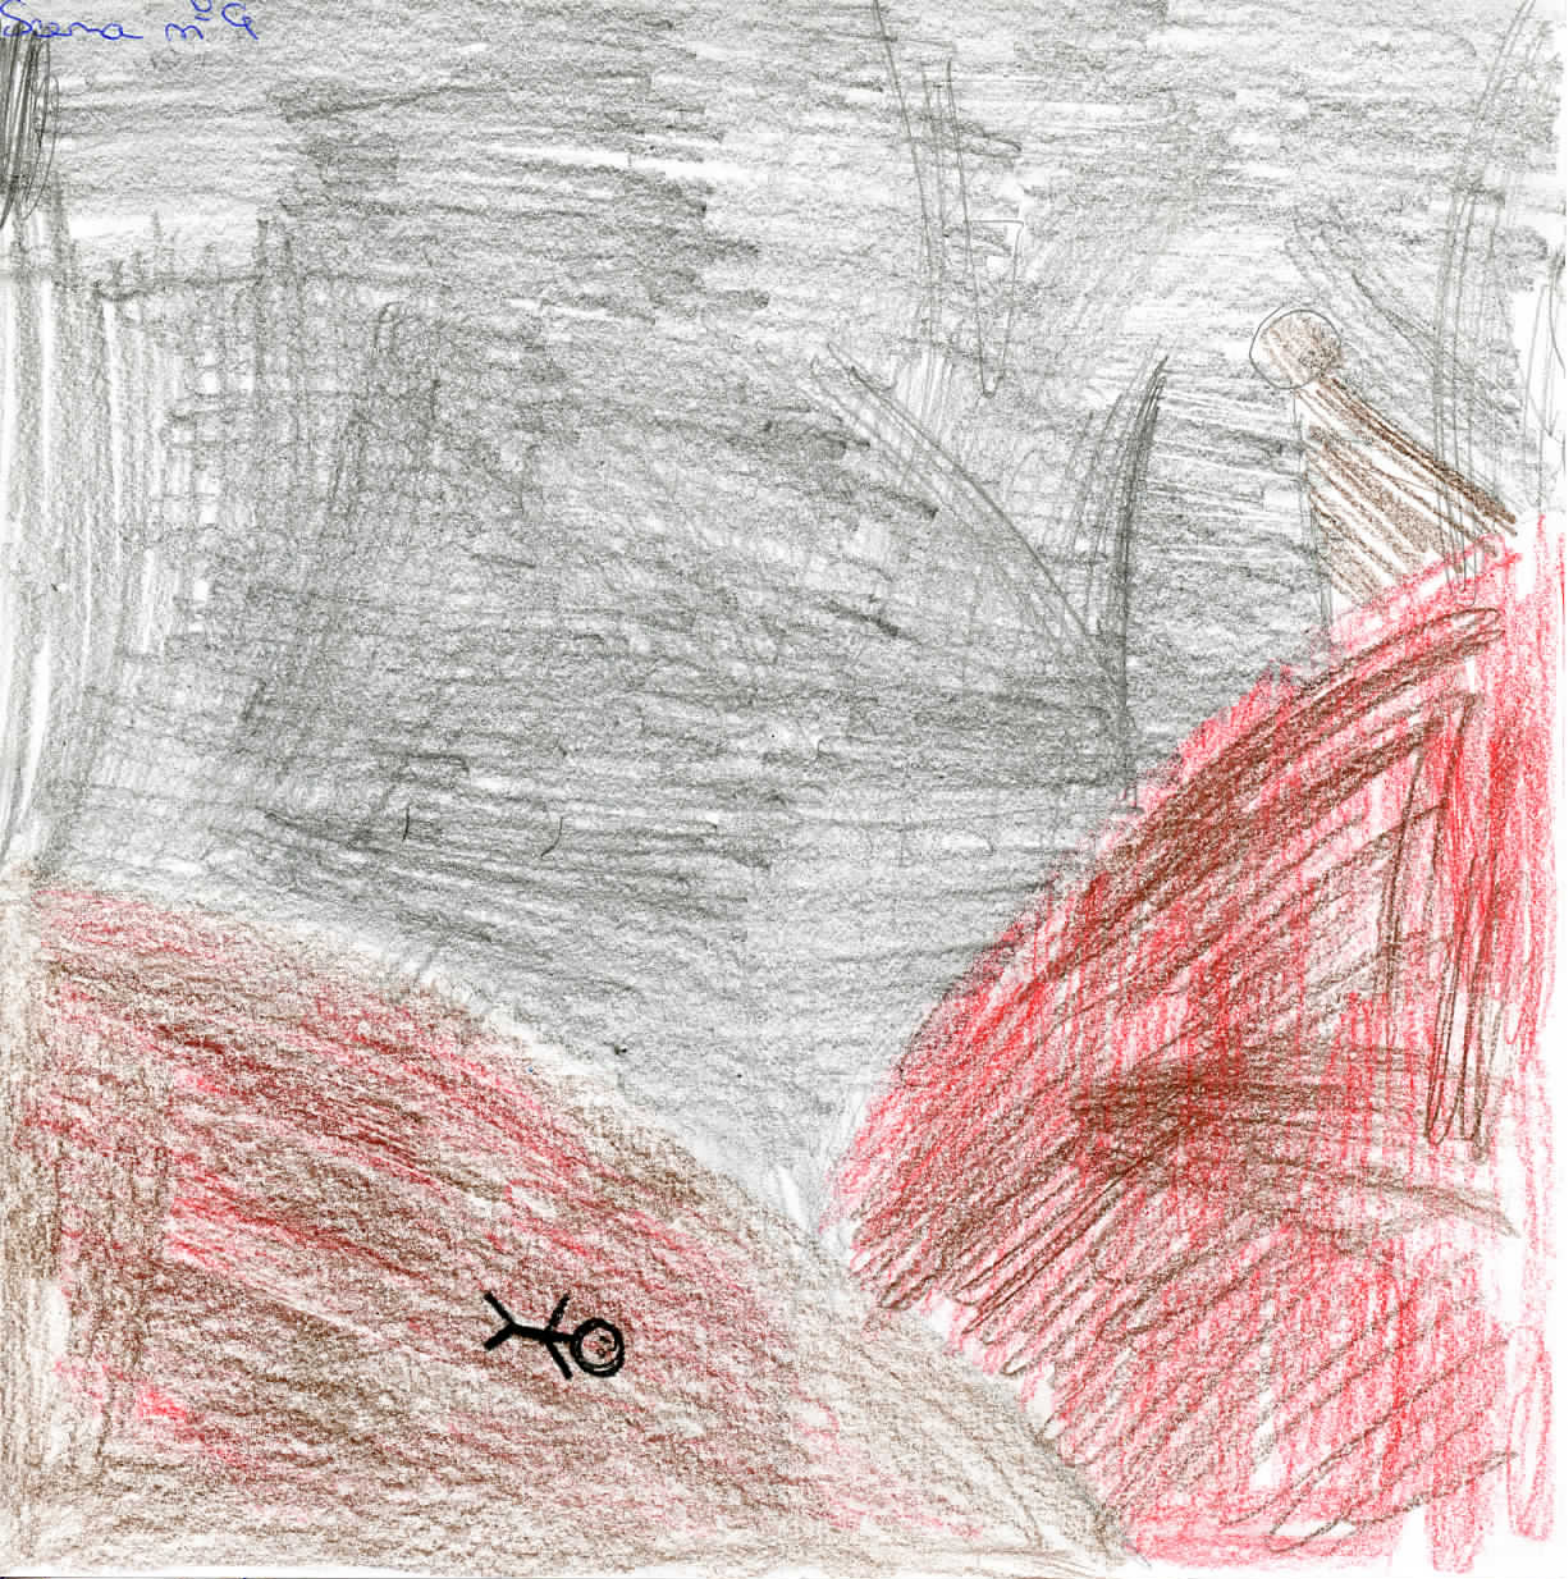

scena m<sup>4</sup>

Il luce c'è ancora ma dopo pochi secondi lui cade nella lava e muore, subito dopo l'evoluzione è finita.

3

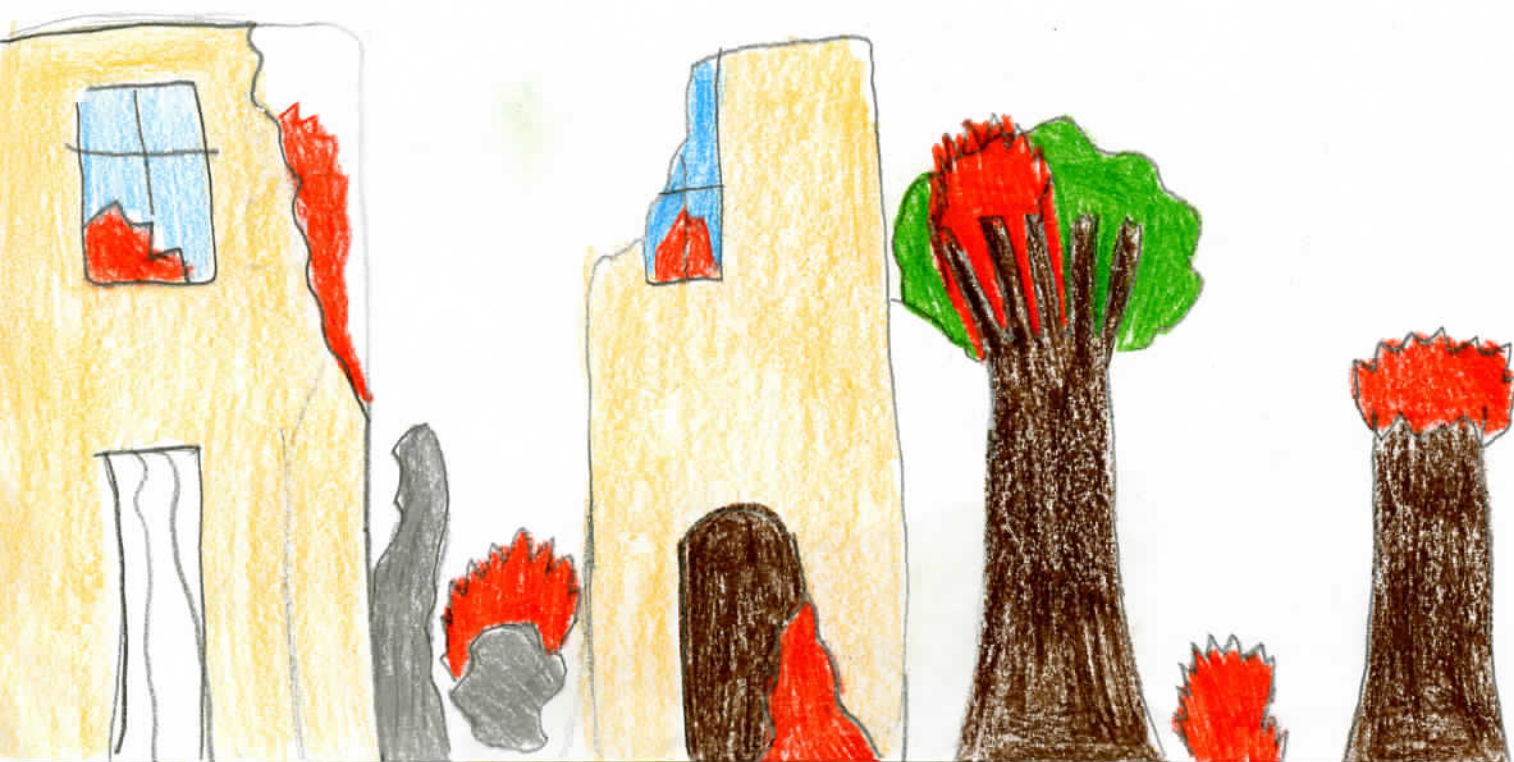

Dopo l'eruzione andarono a vedere cosa era successo. Rimase  
tutti sbalorditi, tutte le piante erano distrutte, le case caddero  
a pezzi e tanti animali morti.

4

SCENA 4

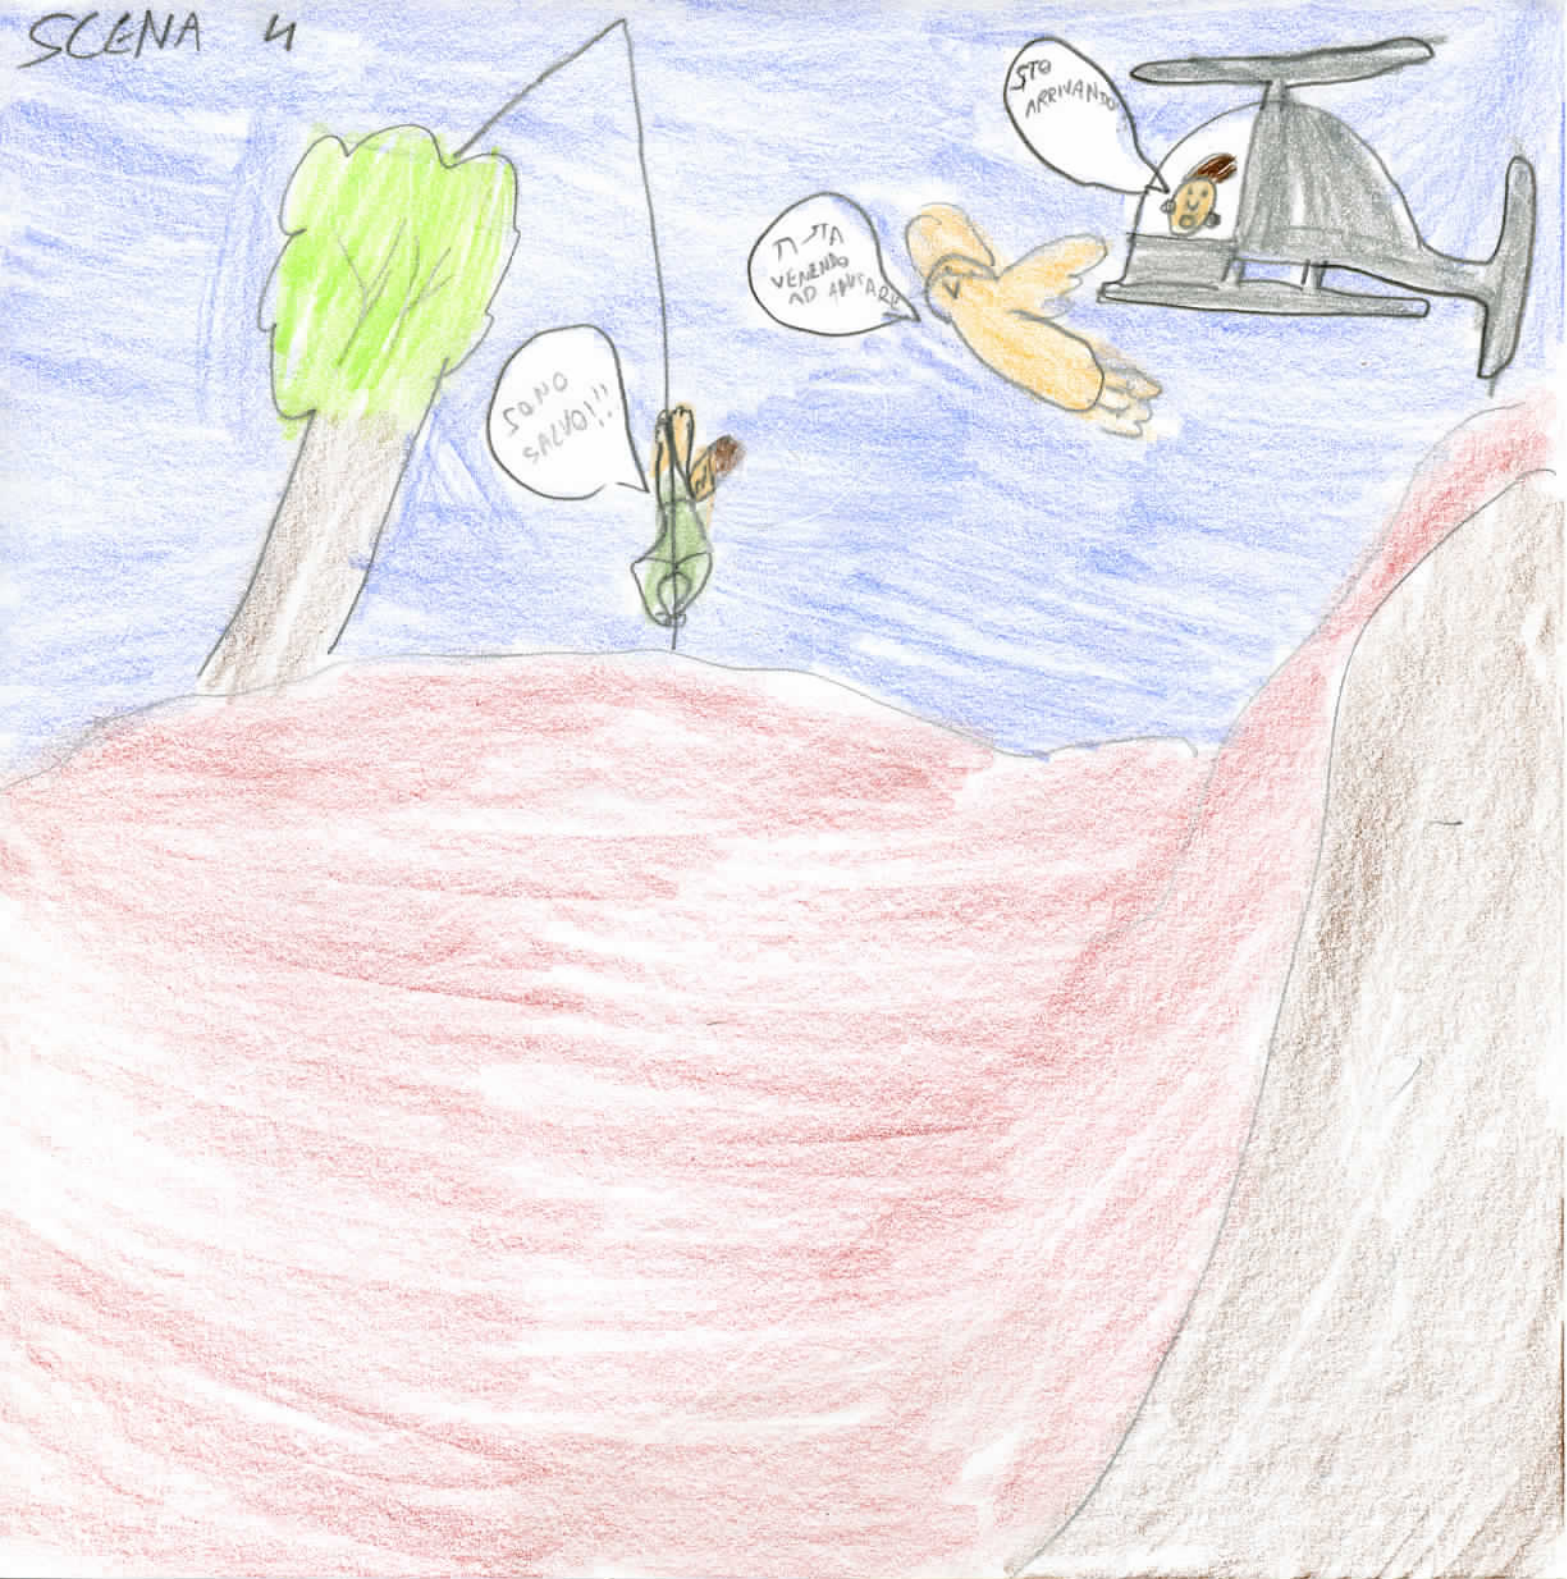

SCENA 4

Era finita la lava. Il pappagallo tornò con <sup>un</sup> elicottero e lo salvò.  
Così tornò con i suoi genitori e vissero tutti felici e contenti  
con il suo affettuoso pappagallo.

Cimitero

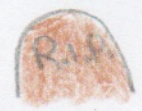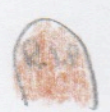

KEVIN →

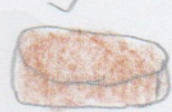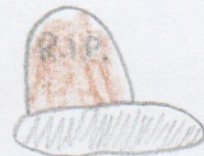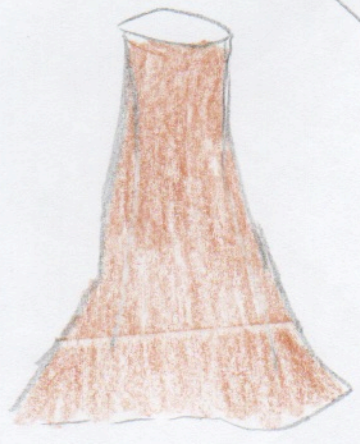

OSPEDALE

(BAGNINO AMICO DI KEVIN)

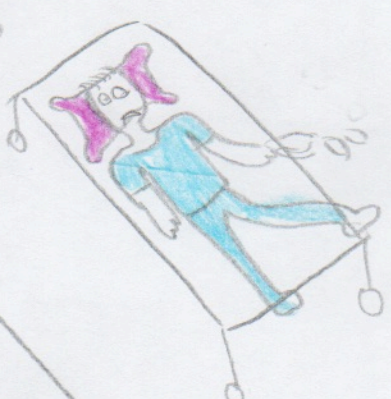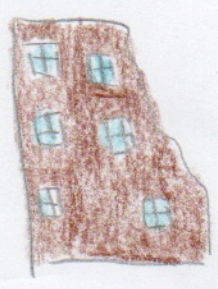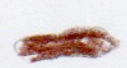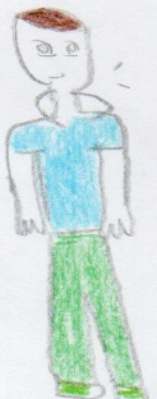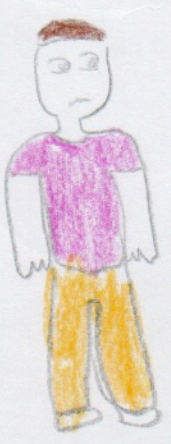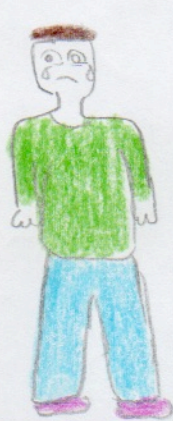

È finito il caos ma la città è distrutta.

Il bagnino amico di Kevin ~~non~~ ~~non~~ gli venne un infarto per la paura, invece Kevin morì perché per scappare venne investito da un camion dei pompieri.

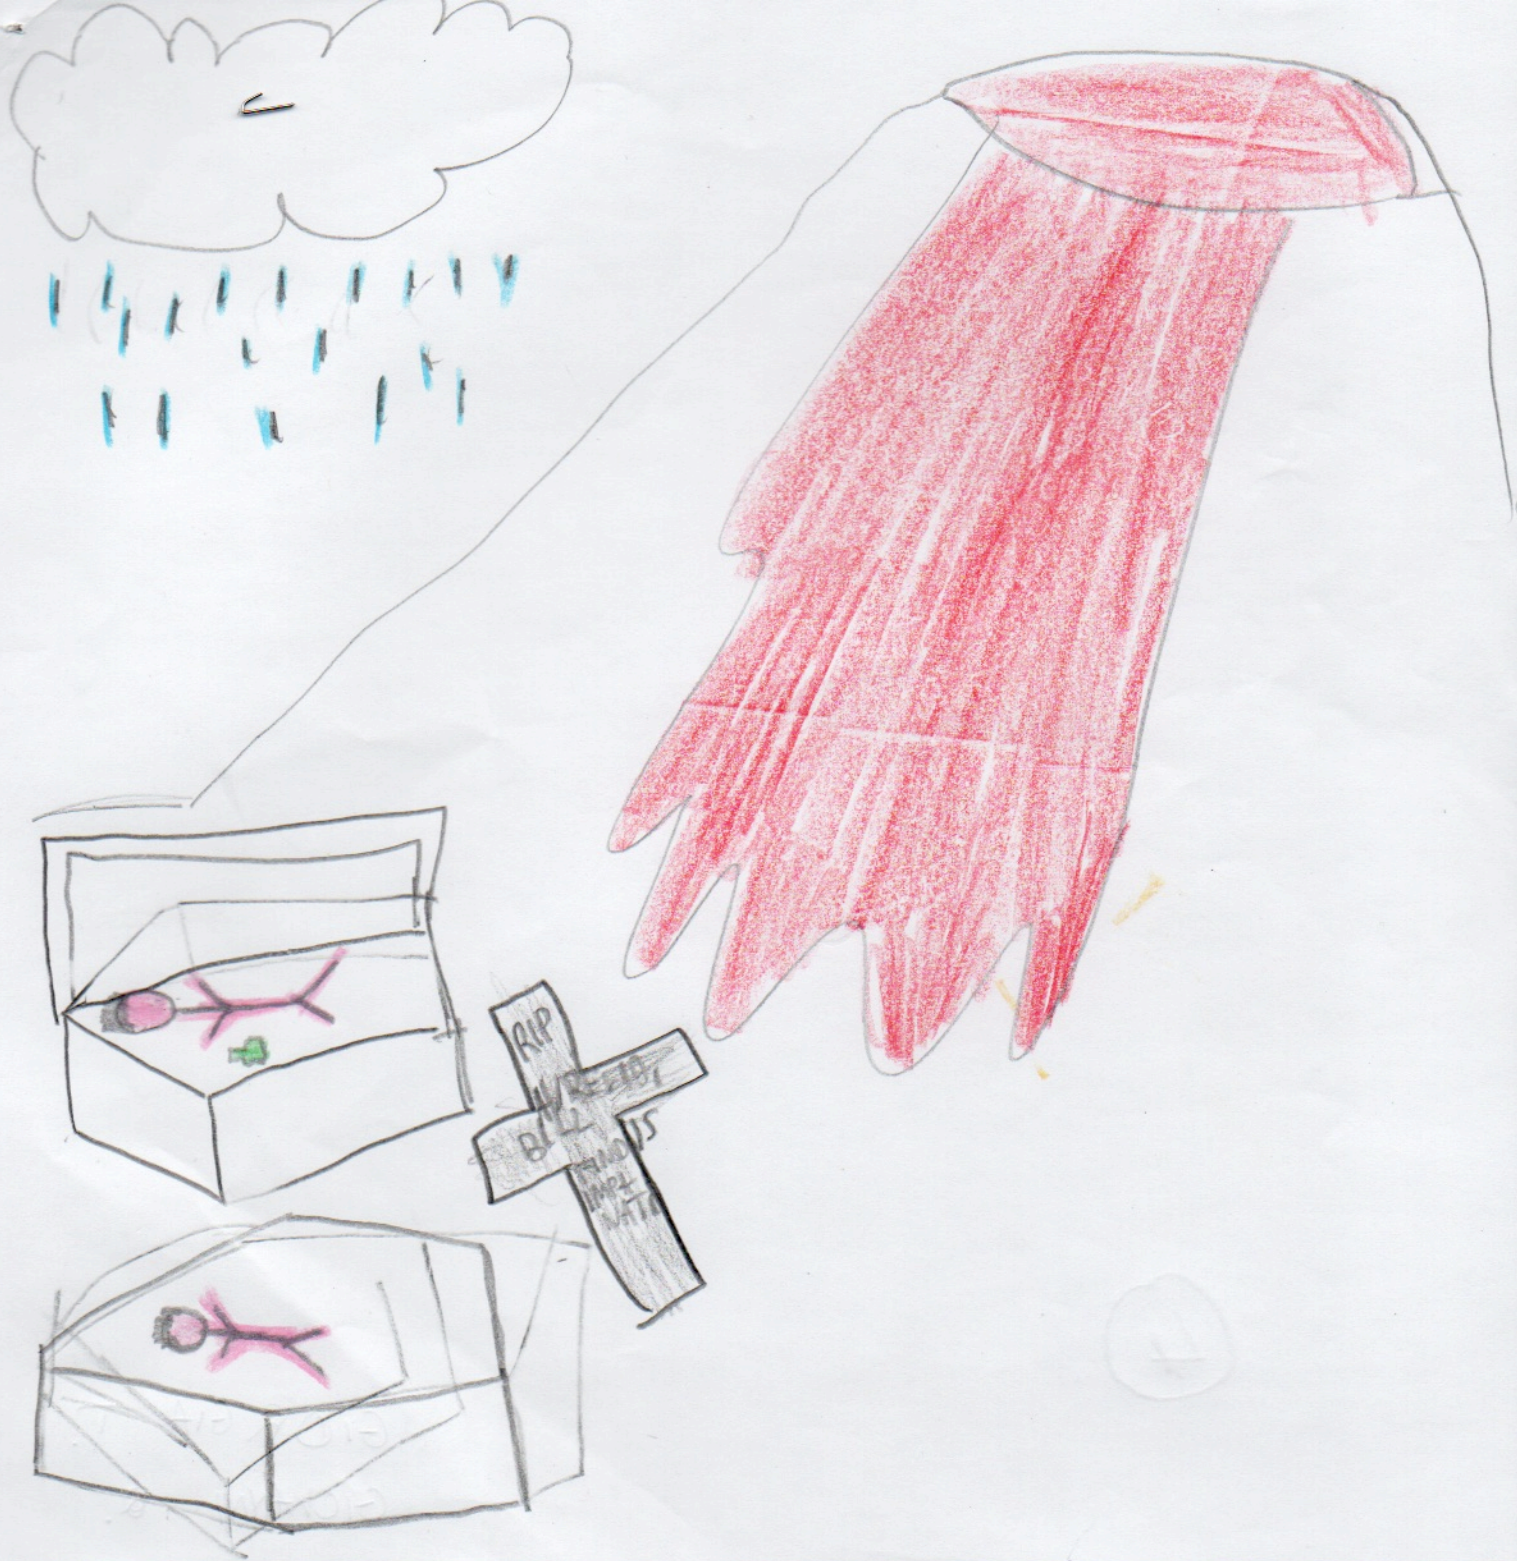

Aurelio non riesce a salvare Bill perché inciampa su un sasso e rotolano verso la lava molendo.

Il vulcano piano piano si ferma, ma ormai è troppo tardi, la città è stata inondata dalla lava e si è salvata solo una bottiglia di birra.

FINE ♥

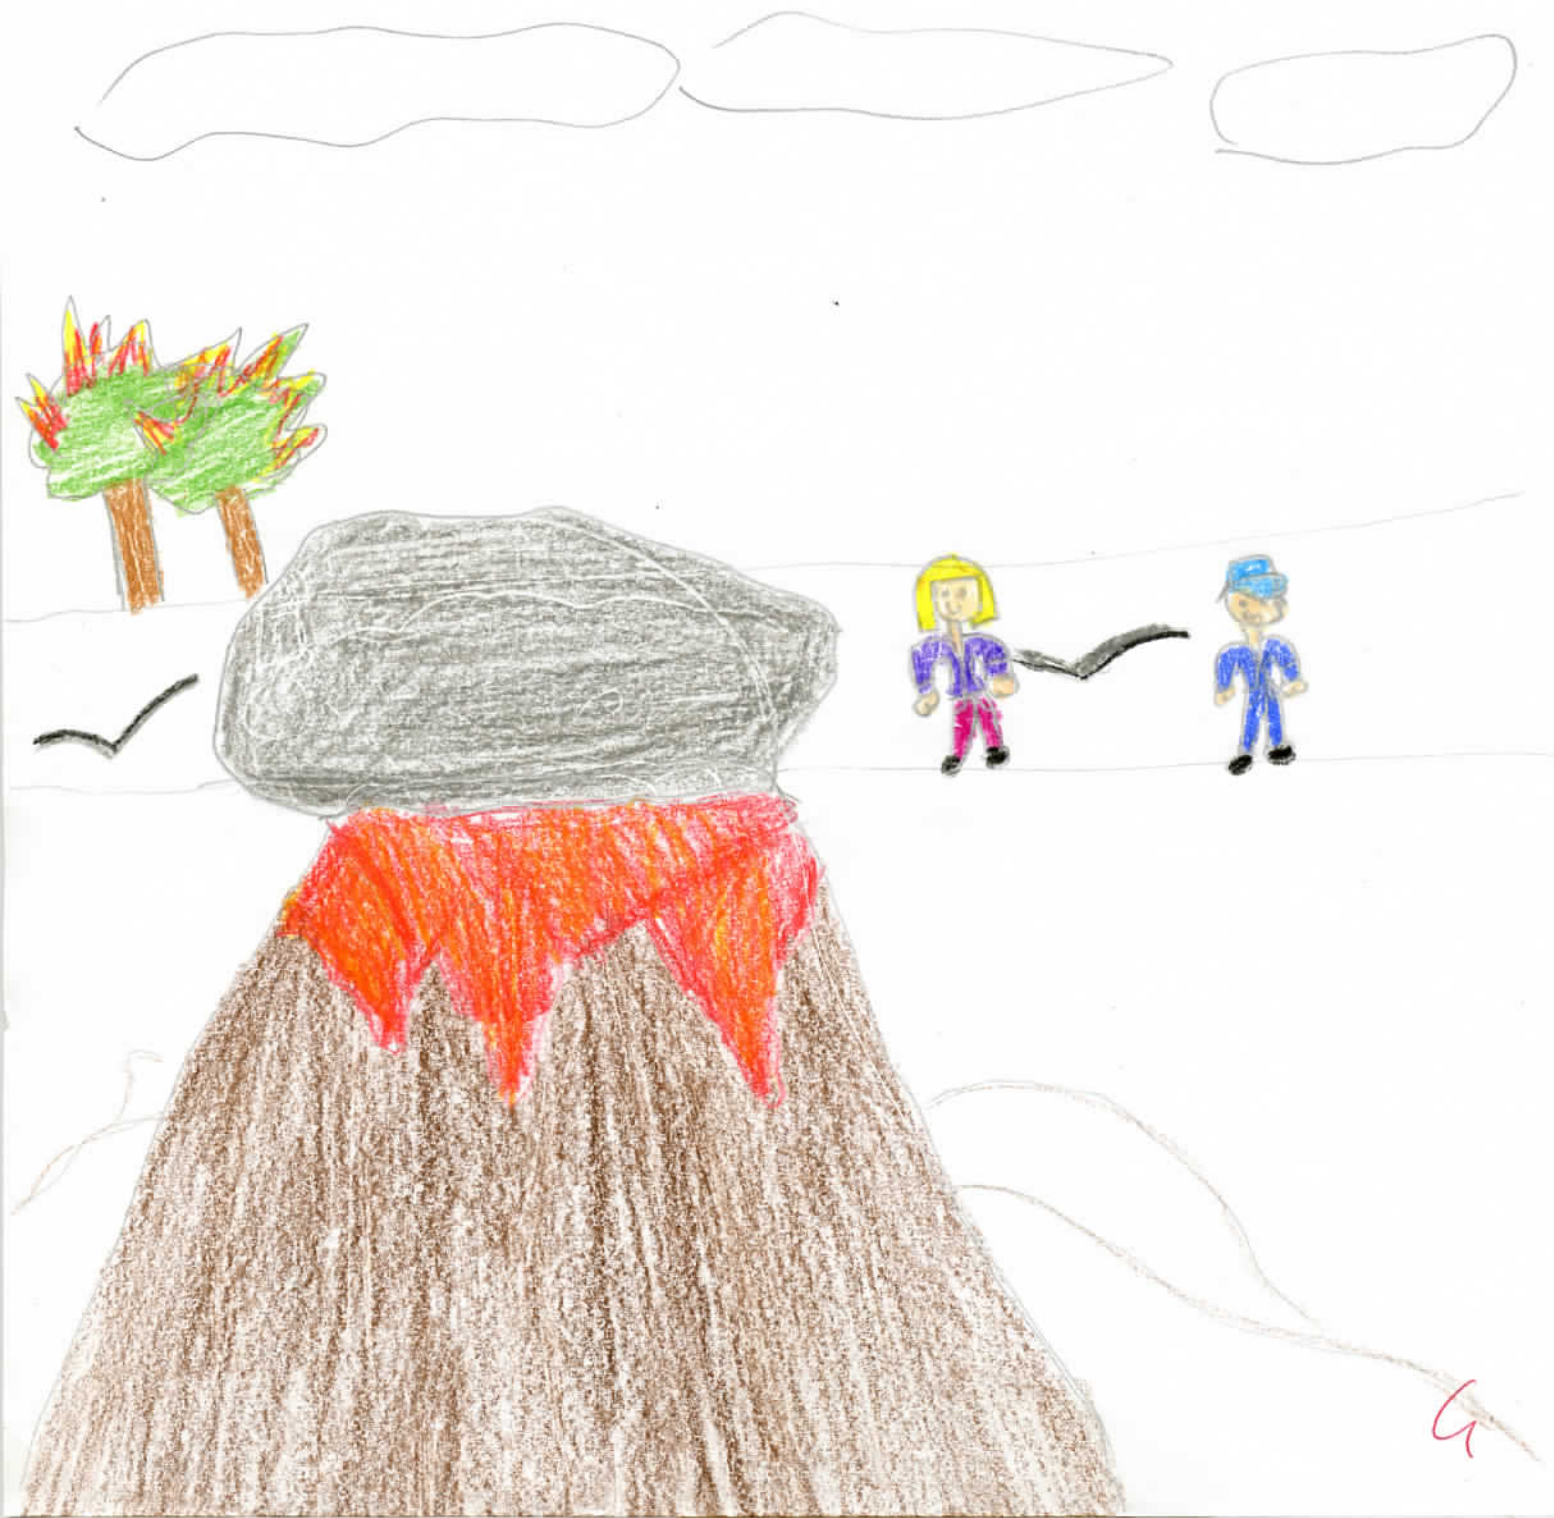

GETATE LE PIETRE IL VULCANO INIZIA A CALMarsi, E  
GRAZIE AL PIOTA L' AEROPORTO FU SALVO. PERO' CI  
FORONO GRAVI DANNI VERSO LA NATURA, E PER FORTUNA  
I VIAGGIATORI SI SALVARONO. DA QUEL GIORNO MARTA  
DIVENNE UN APPASSIONATA DI VULCANI.

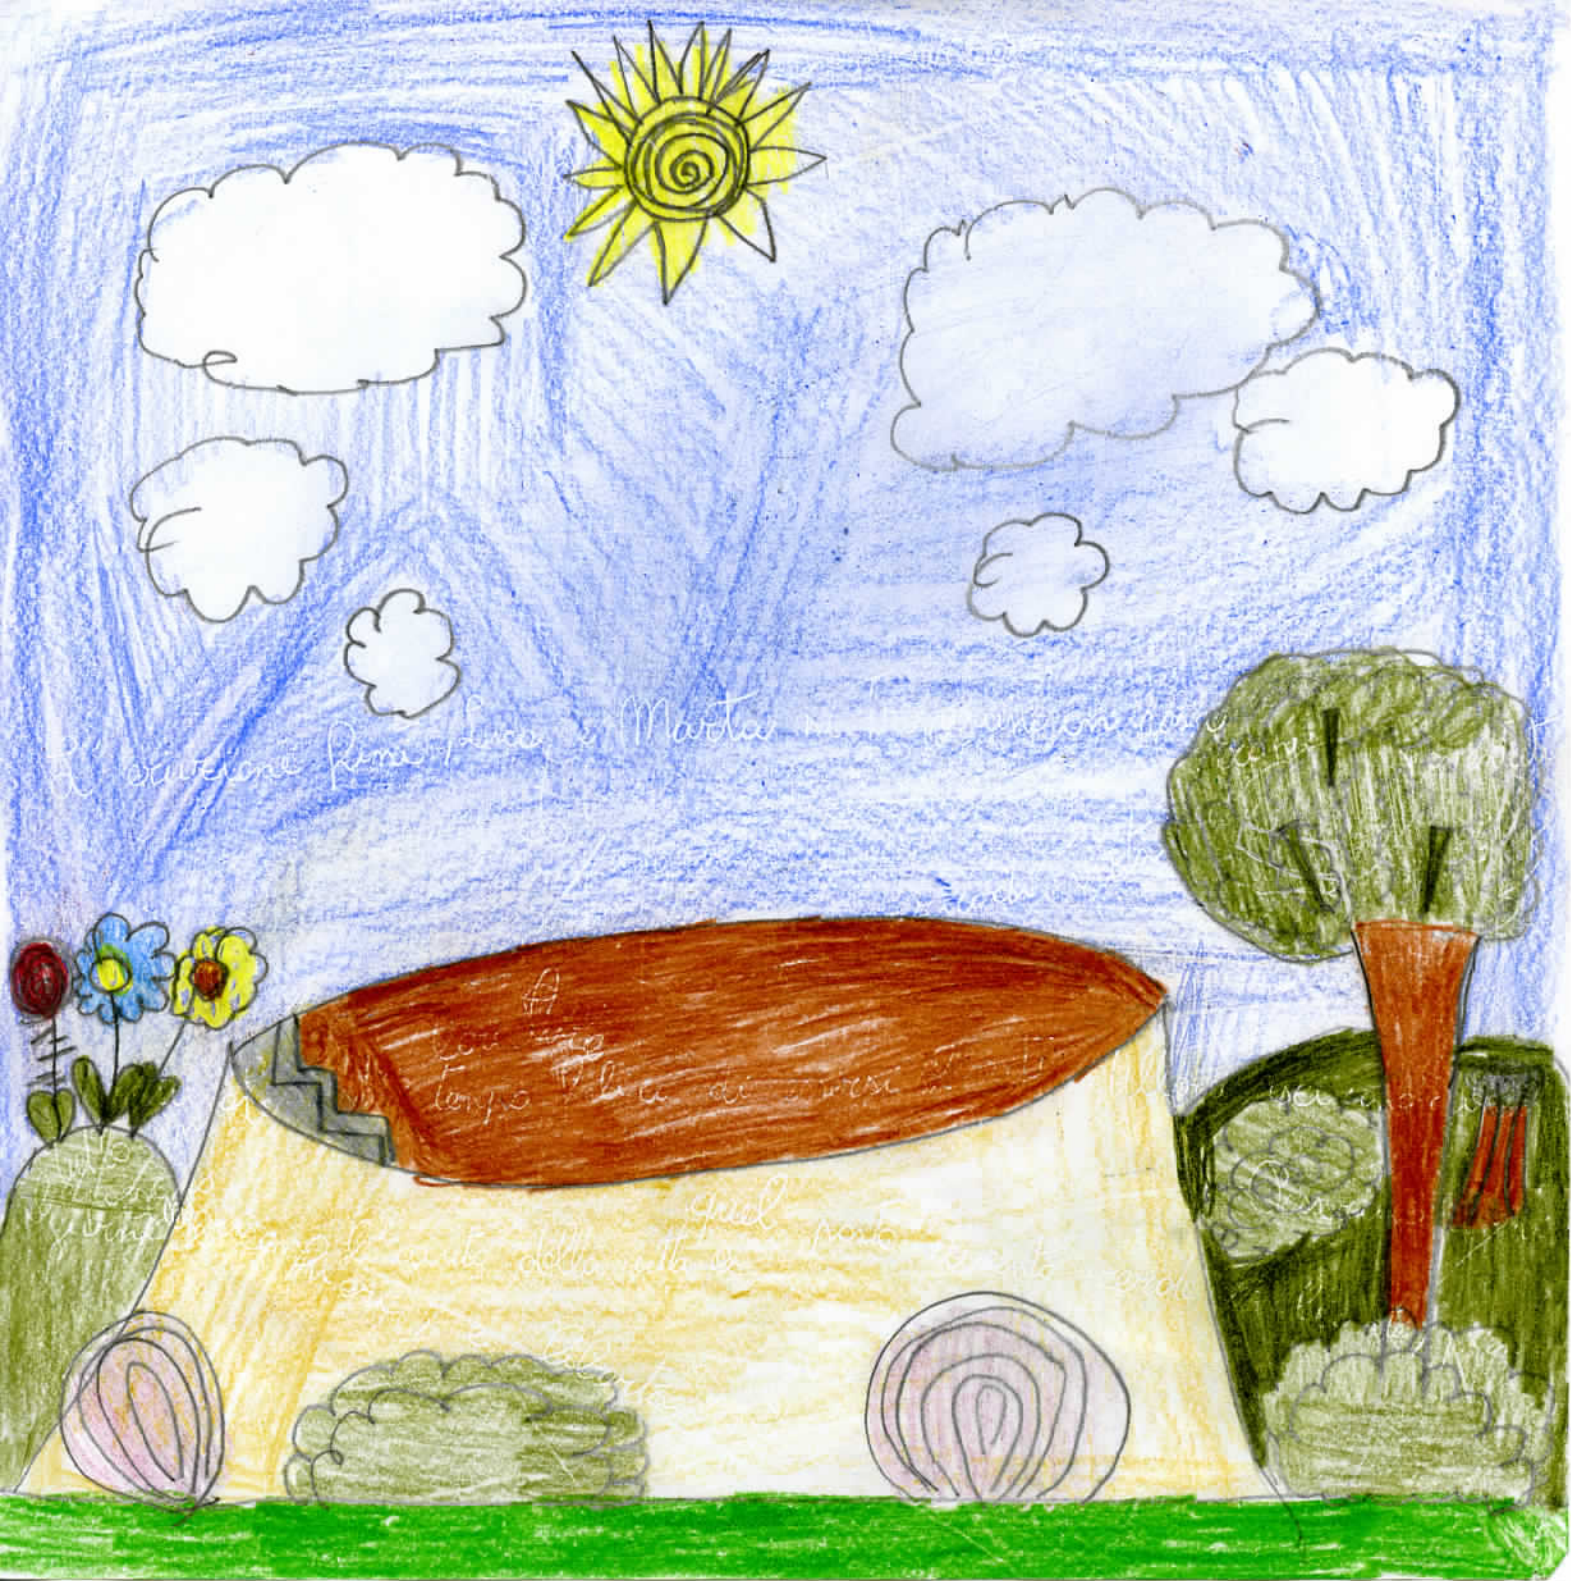

L'occasione finì, Luca e Marta si trovarono in casa. Erano spaventati  
 ma allo stesso tempo felici di essersi salvati. Allora uscirono di casa e  
 tutto intorno a loro era senza un pezzo di vita. Passarono anni e  
 giorni, ma con l'aiuto della città quel posto diventò verde brillante, pieno  
 di alberi, fiori, e libertà.



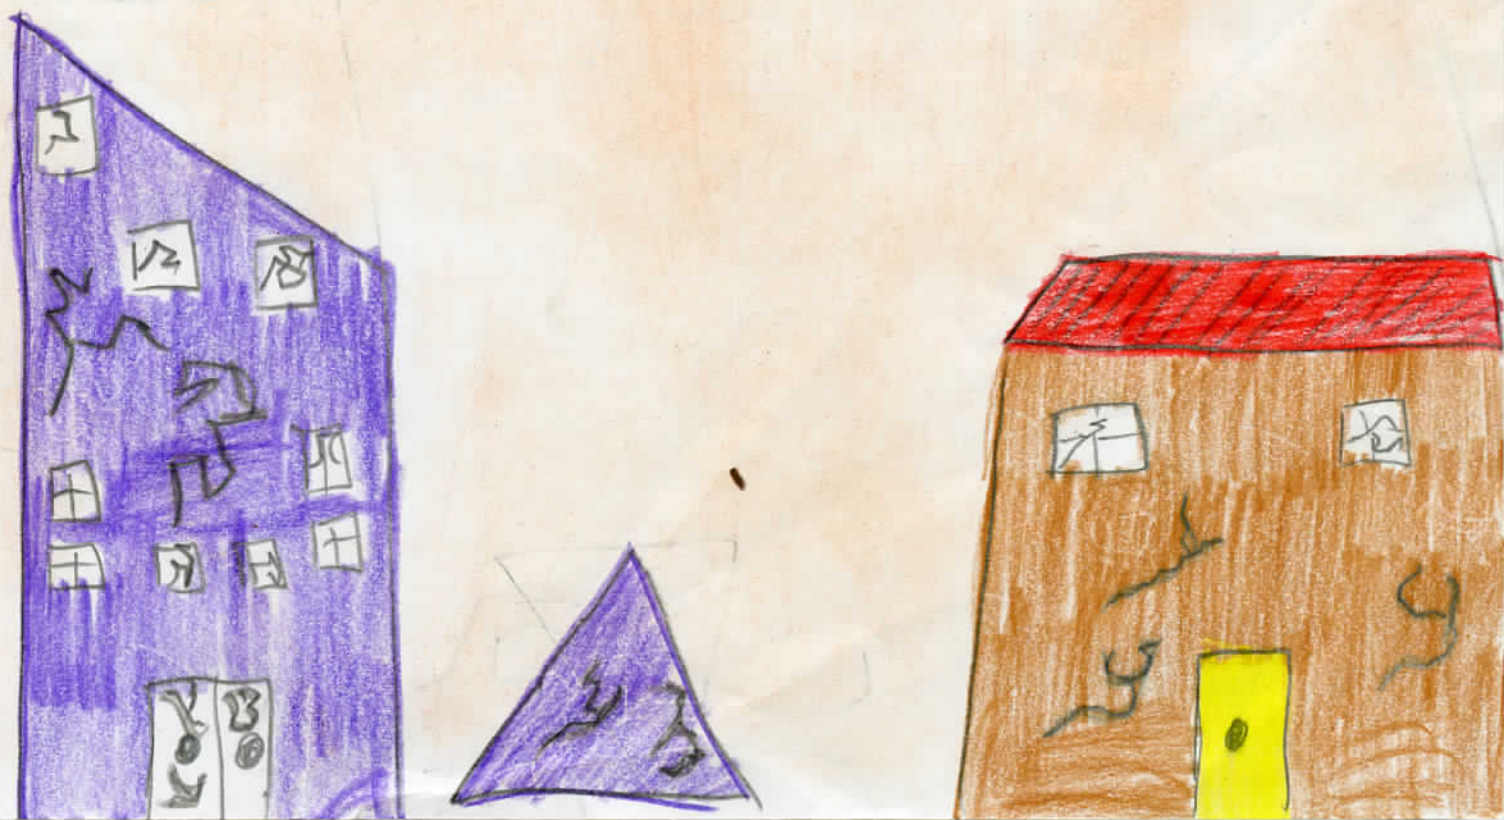

Alla fine il vulcano finì di eruttare, e si era  
distrutto tutto!!!! E allora gli scienziati non  
sapevano <sup>che cosa</sup> ~~cosa~~ fare.

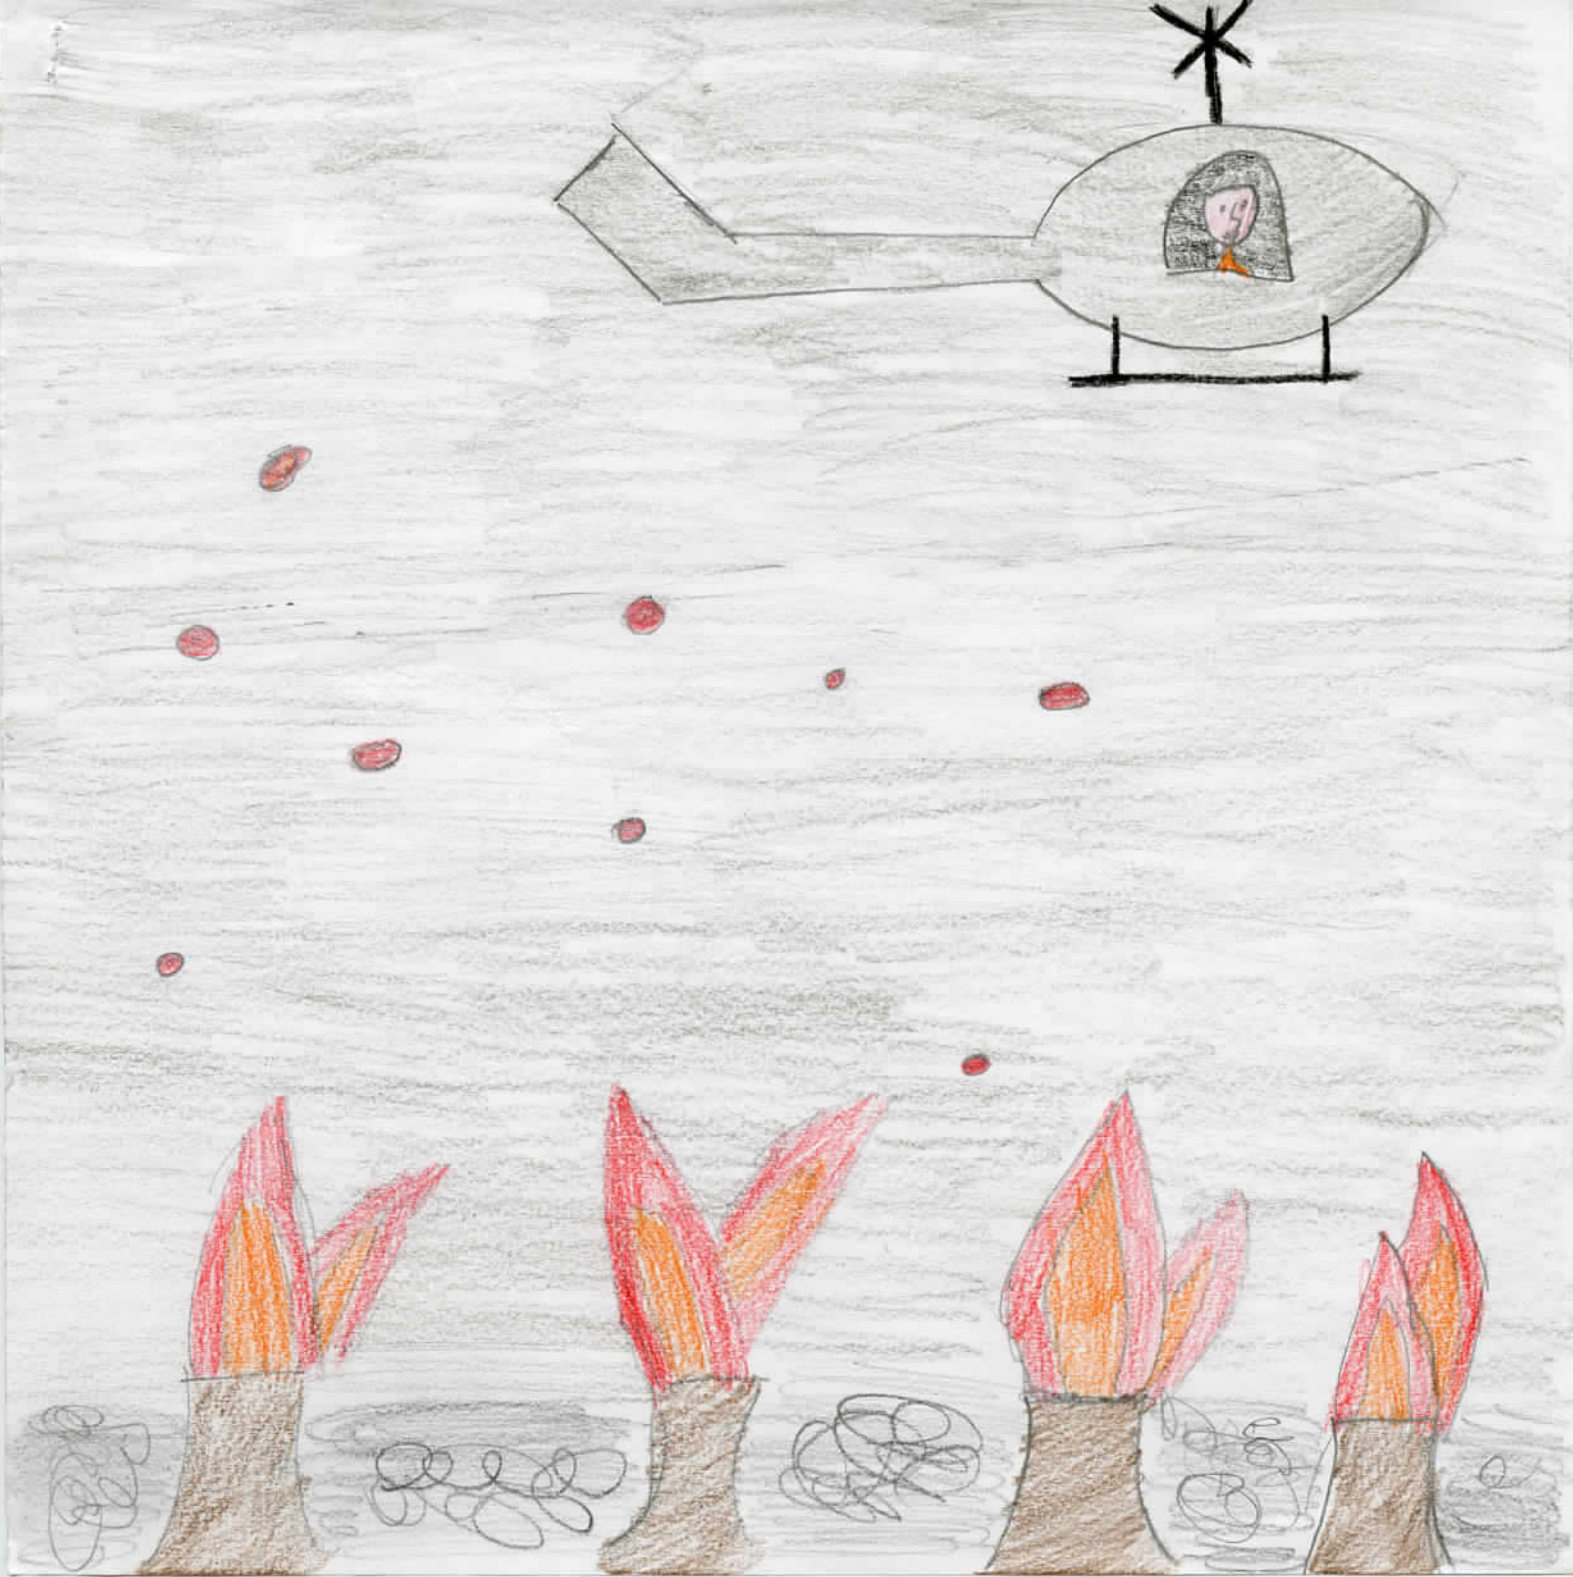

Nella scena si vede il rogo che ormai  
solvo, guarda il terreno bruciato e  
l'ambiente rovinato.

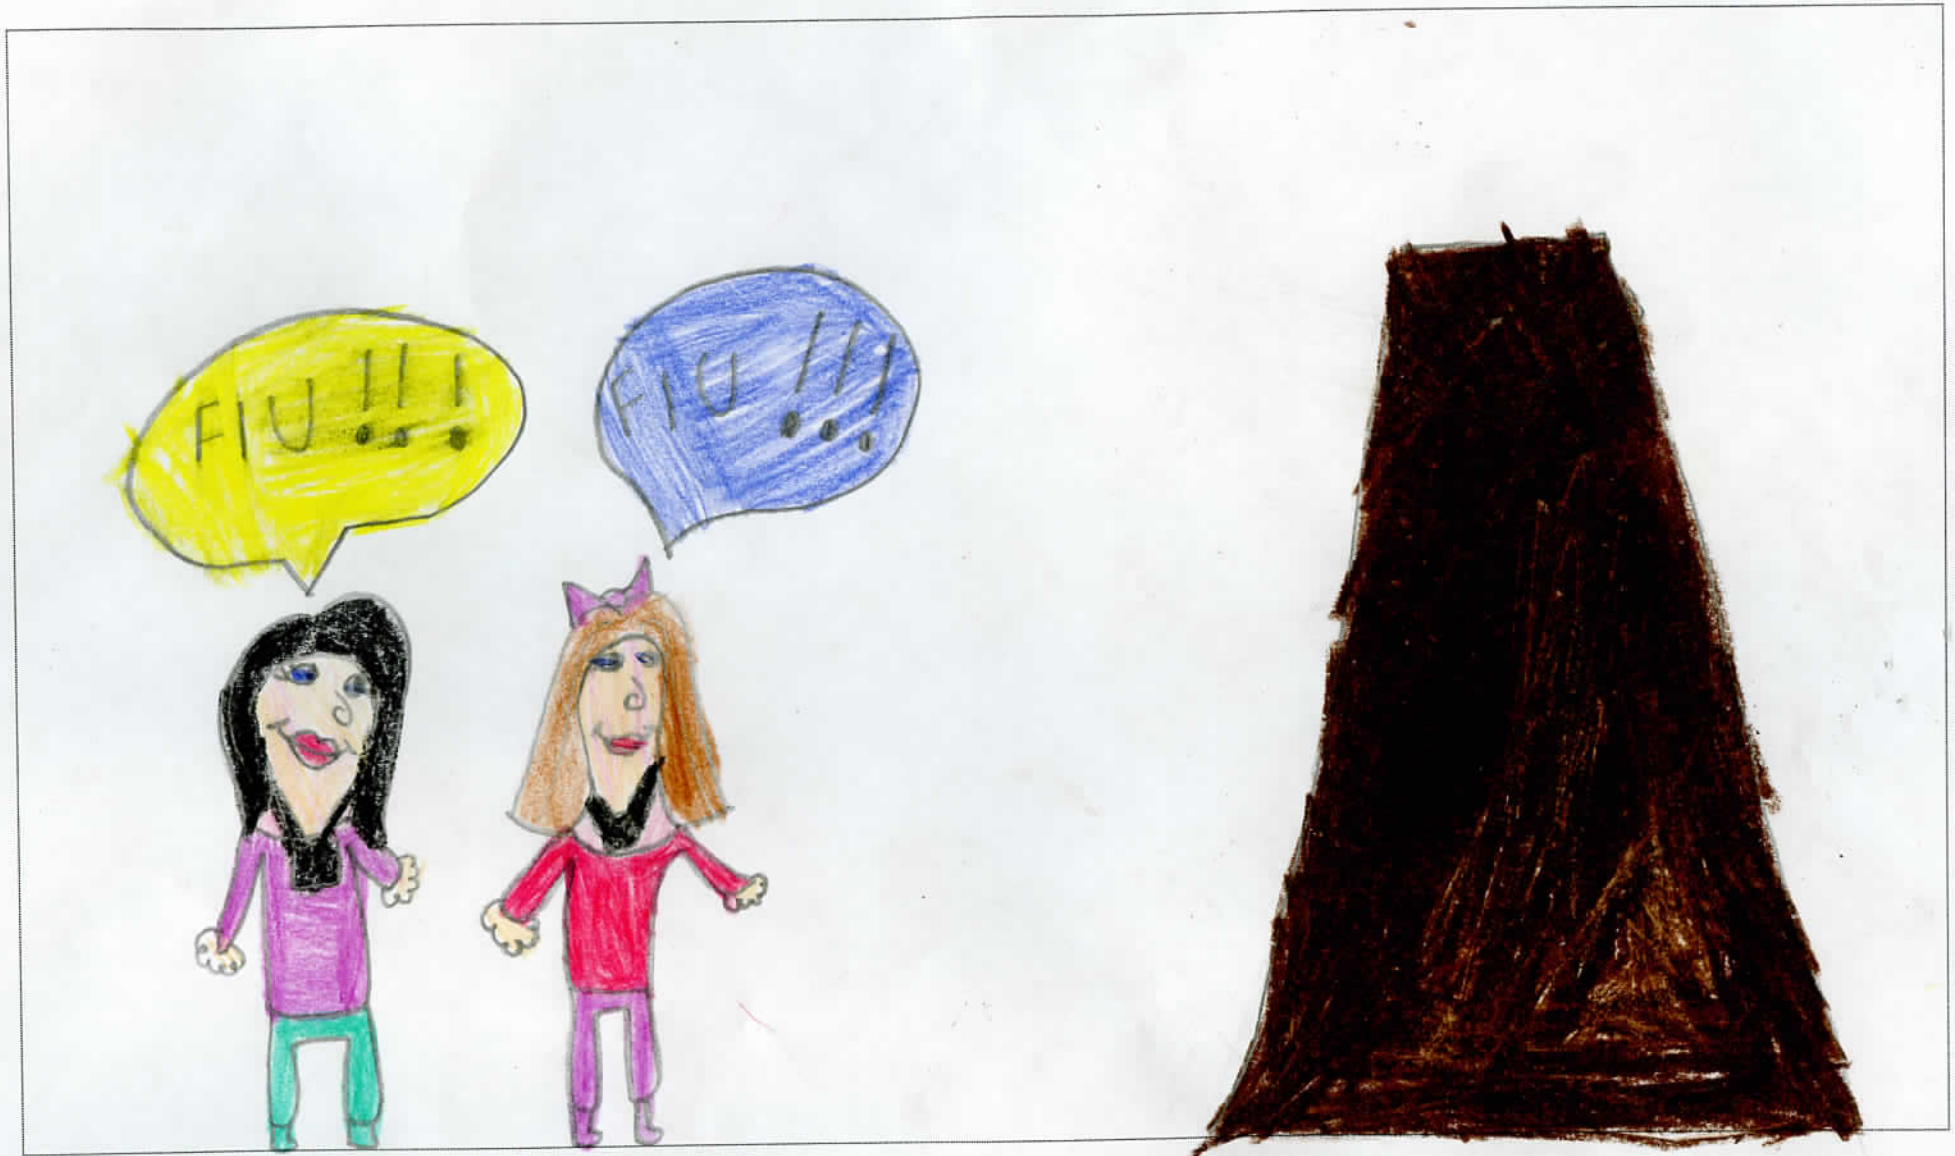

SCENA 4: Una nuova normalità -  $H^{\circ} \perp$  LE DUE GEOLOGHE, CONTENTE DELLA SCOPERTA, FOTOGRAFANO IL VULCANO ORMAI SPENTO.

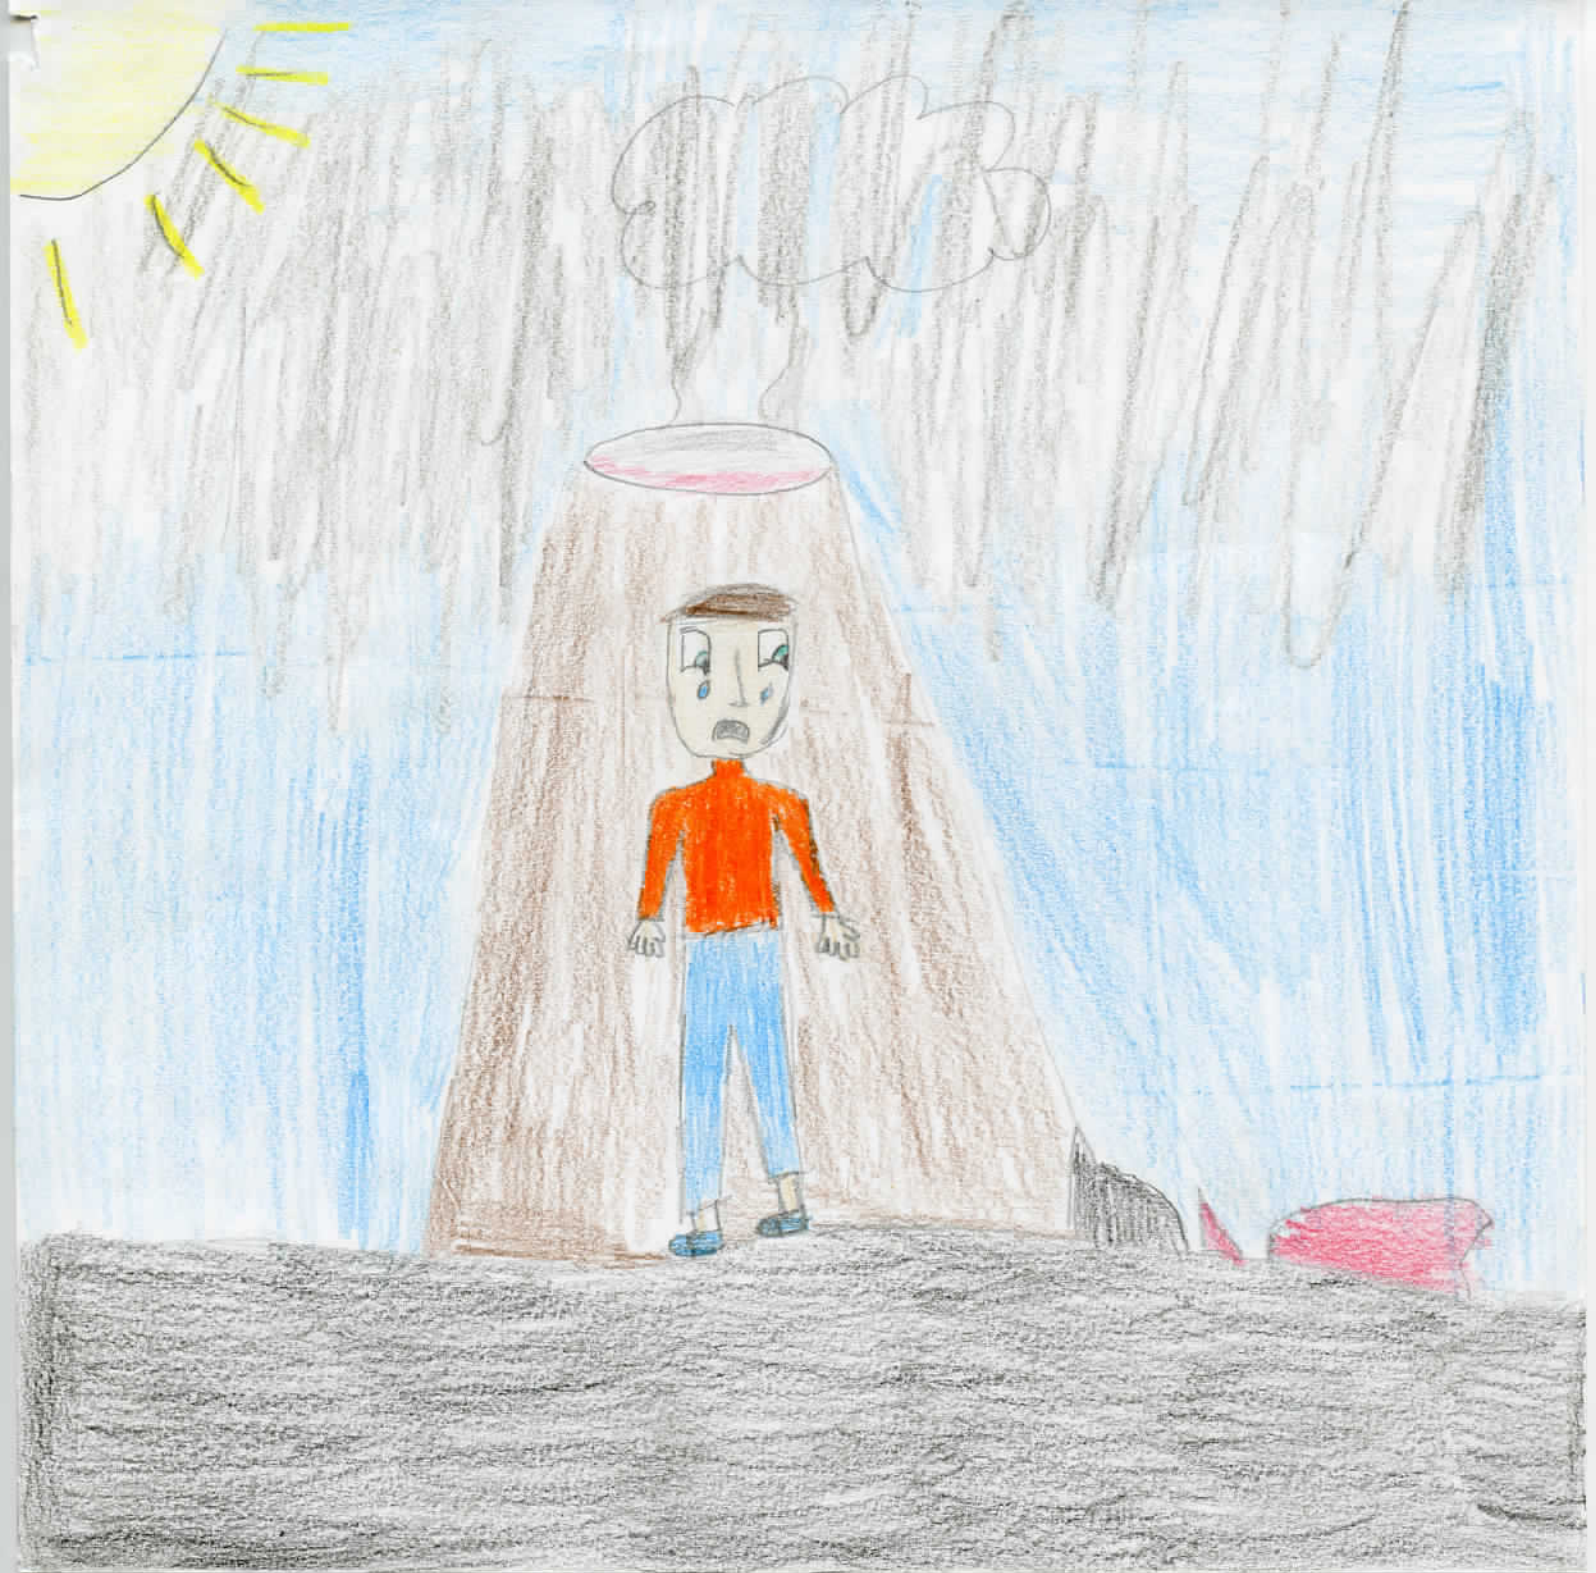

MARRY SI TROVA DI NUOVO DAVANTI A CASA SUA ED E' TRISTE PERCHE'  
LA SUA CASA E' STATA DISTRUTTA, L'AMBIENTE  
E' DISTRUTTA ALLORA LUI SI RIVOLGE A DELLE  
ASSOCIAZIONI PER NON FARE SUCCEDERE PIU' CIO' CHE  
E' SUCCESSO
